# Supplementary material for: The Mouse Blood-Brain Barrier Transcriptome: A New Resource for Understanding the Development and Function of Brain Endothelial Cells
Source: PLoS One. 2010 Oct 29;5(10):e13741. doi: 10.1371/journal.pone.0013741 (PMC2966423; doi:10.1371/journal.pone.0013741)
Supplement: Table S1 — Complete Excel spreadsheet. The Excel spreadsheet containing the comprehensive list of probe sets from the mouse 430-2 GeneChip, with expression values for adult brain GFP−, adult brain GFP+, adult brain GFP+PDGFRbeta−, liver GFP+, lung GFP+, and postnatal brain GFP+ samples. Each expression value is the average of at least three biological replicates. (9.96 MB XLS) [file pone.0013741.s001.xls]

## Sheet: S1-Full Data Table
Probe set	Brain Parenchyma	Brain Vascular	Brain Endothelial	Postnatal Brain GFP+	Liver GFP+	Lung GFP+	Gene Symbol	UniGene ID	Gene Title
1434332_at	1325.13	2086.7	2064.13	2298.2	1824.27	2098	Zzz3	Mm.379292	zinc finger, ZZ domain containing 3
1438487_s_at	1080.87	1453.13	2147.6	878.62	990	1717.07	Zzz3	Mm.379292	zinc finger, ZZ domain containing 3
1441748_at	117.967	212.8	336.9	127.46	120.433	133.6	Zzz3	Mm.379292	Zinc finger, ZZ domain containing 3
1434192_at	221.967	265.4	225.967	186.04	329.133	307.367	Zzef1	Mm.272030	zinc finger, ZZ-type with EF hand domain 1
1438691_at	1391.27	1801.57	1375.63	1147.26	1755.4	2175.27	Zzef1	Mm.272030	zinc finger, ZZ-type with EF hand domain 1
1446081_at	174.6	137.567	133.4	106.1	133.533	115.433	Zzef1	Mm.272030	Zinc finger, ZZ-type with EF hand domain 1
1453583_at	457.067	306.2	252.033	166.4	383.567	827.9	Zzef1	Mm.272030	zinc finger, ZZ-type with EF hand domain 1
1417240_at	1239	1086.53	1138.93	2716.2	2295.63	2149.43	Zyx	Mm.282303	zyxin
1438552_x_at	96.8	108.967	61.7333	87.58	100.433	66.3333	Zyx	Mm.282303	zyxin
1435754_at	1153.13	783.767	749.667	672.76	569.133	656.7	Zyg11b	---	zyg-ll homolog B (C. elegans)
1446244_at	324.3	188.733	318.167	218.26	144.267	255.333	Zyg11b	---	zyg-ll homolog B (C. elegans)
1447207_at	48.3667	28.4333	66.8333	42.38	59.4	33.1333	Zyg11b	Mm.259506	zyg-ll homolog B (C. elegans)
1427647_at	14.9333	25.0333	27.2333	6.54	9.23333	12.7667	Zyg11a	Mm.301798	zyg-11 homolog A (C. elegans)
1417158_at	369.5	411.8	546.8	210.66	489.9	303.267	Zxdc	Mm.100116	ZXD family zinc finger C
1433869_at	426.533	367.133	245.733	308.68	336.633	228.733	Zxdc	Mm.100116	ZXD family zinc finger C
1455817_x_at	412.9	636.467	700.933	323.26	436.4	756	Zxdb	Mm.426145	zinc finger, X-linked, duplicated B
1460441_at	306.9	613.633	667.7	635.26	443.5	533.167	Zxdb	Mm.426145	zinc finger, X-linked, duplicated B
1439077_at	75.3667	208	166.367	141.8	131.133	231.067	Zxda	Mm.426134	zinc finger, X-linked, duplicated A
1444595_at	36.6333	98.0667	103.367	60.94	50.9667	72.1	Zxda	Mm.426134	zinc finger, X-linked, duplicated A
1423724_at	7706.27	2111.83	2000.97	4101.52	3072.8	3257.47	Zwint	Mm.62876	ZW10 interactor
1427539_a_at	463.333	922.1	1042.3	2828.6	1046.23	2644.07	Zwint	Mm.62876	ZW10 interactor
1427540_at	125.2	263.233	311.2	761.24	210.2	1063.6	Zwint	Mm.62876	ZW10 interactor
1429786_a_at	487.7	95.6	58.8667	317.34	181.833	154.1	Zwint	Mm.62876	ZW10 interactor
1429787_x_at	621.767	535.167	534.5	1370.7	676.967	1306.2	Zwint	Mm.62876	ZW10 interactor
1444717_at	131.5	94.7667	127.667	103.06	87.7333	163.867	Zwint	Mm.62876	ZW10 interactor
1455382_at	21.8667	18.9667	31.4667	31.3	31.7333	34.8667	Zwint	Mm.62876	ZW10 interactor
1416757_at	258.7	76.5667	51.2667	367.36	145.2	140.9	Zwilch	Mm.335237	Zwilch, kinetochore associated, homolog (Drosophila)
1424891_a_at	930.333	1223.37	1267.37	1054.48	993.3	1188.03	Zw10	Mm.24791	ZW10 homolog (Drosophila), centromere/kinetochore protein
1431747_at	44.7	24.2667	58.1333	23.32	37.9667	36.7667	Zw10	Mm.24791	ZW10 homolog (Drosophila), centromere/kinetochore protein
1445206_at	31.3	12.8	17.6667	19.48	12.6333	37.2333	Zw10	Mm.24791	ZW10 homolog (Drosophila), centromere/kinetochore protein
1454668_at	1518.3	1728	1232.13	1746.32	1530.1	1747.8	Zubr1	Mm.318691	zinc finger, UBR1 type 1
1434967_at	1498.3	933.3	894.567	1051.74	3749.6	2883.33	Zswim6	Mm.219433	zinc finger, SWIM domain containing 6
1444227_at	3.6	1.16667	0.9	6.72	4.33333	5.86667	Zswim6	Mm.219433	Zinc finger, SWIM domain containing 6
1451819_at	81.3667	109.7	65.1	149.5	402.4	144.967	Zswim6	Mm.219433	zinc finger, SWIM domain containing 6
1459722_at	541.9	232.833	499	154.52	743.233	1205.97	Zswim6	Mm.219433	Zinc finger, SWIM domain containing 6
1431891_at	12.7667	23.7333	38.2	39.06	24.9	15.2333	Zswim5	Mm.218946	zinc finger, SWIM domain containing 5
1438224_at	163.567	28.6667	44.3333	27.8	13.2667	73.7	Zswim5	Mm.218946	zinc finger, SWIM domain containing 5
1436710_at	90.4667	78.1	56.1	177.5	123.833	164.833	Zswim4	Mm.436722	zinc finger, SWIM domain containing 4
1428313_at	72.8667	111.667	52.3667	16.58	185.433	43.5667	Zswim3	Mm.33184	zinc finger, SWIM domain containing 3
1444571_at	24.2667	38.9333	23.3333	21	36.2333	15.9667	Zswim3	Mm.33184	Zinc finger, SWIM domain containing 3
1457785_at	57.2	33.5	72.6333	25.96	13.1	37.8667	Zswim3	Mm.33184	Zinc finger, SWIM domain containing 3
1429751_at	29.0667	51.4	61.5667	61.78	70.8333	51.0333	Zswim2	Mm.116957	zinc finger, SWIM domain containing 2
1432201_a_at	6.46667	6.06667	13.3333	3.46	13.5667	16.7	Zswim2	Mm.116957	zinc finger, SWIM domain containing 2
1451189_at	305.033	283.133	192.567	211.9	285.633	139.8	Zswim1	Mm.161149	zinc finger, SWIM domain containing 1
1424789_at	272	251.867	256.3	165.06	215.5	128.6	Zscan22	Mm.40706	zinc finger and SCAN domain containing 22
1436360_at	233.5	348.767	287	160.1	335.433	145.533	Zscan22	Mm.40706	zinc finger and SCAN domain containing 22
1416370_at	320.733	341.567	240.833	315.46	358.967	239.867	Zscan21	Mm.2760	zinc finger and SCAN domain containing 21
1420095_s_at	662.333	885.4	583.1	777.22	611.4	421.867	Zscan21	Mm.2760	zinc finger and SCAN domain containing 21
1420096_at	54.9	16.9	62	27.1	24.8333	22.0333	Zscan21	Mm.2760	Zinc finger and SCAN domain containing 21
1449732_at	890.933	1227.47	1701.3	1332.44	788	955.6	Zscan21	Mm.2760	zinc finger and SCAN domain containing 21
1436280_at	65.6	35.1333	41.9	26.74	63.6667	47.3333	Zscan20	Mm.153291	zinc finger and SCAN domains 20
1450514_at	6.13333	5.6	3.6	12.64	3.73333	3.46667	Zscan2	Mm.358645	zinc finger and SCAN domain containing 2
1438787_at	74.3	138.533	159.467	121.88	93.9667	96.7667	Zscan10	Mm.270315	zinc finger and SCAN domains 10
1421128_at	6.8	21.3667	19.1333	17.14	13.3	20.4333	Zrsr2	Mm.426178	zinc finger (CCCH type), RNA binding motif and serine/arginine rich 2
1442154_at	311.833	247.6	352.267	197.58	134.067	182.9	Zrsr2	Mm.426178	zinc finger (CCCH type), RNA binding motif and serine/arginine rich 2
1455727_at	690.533	2203.53	5703.13	2390.5	2849.17	2446.3	Zrsr2	Mm.426178	zinc finger (CCCH type), RNA binding motif and serine/arginine rich 2
1449354_at	1394.97	1783.2	1884.63	856.06	1660.67	1448.5	Zrsr1	Mm.29542	zinc finger (CCCH type), RNA binding motif and serine/arginine rich 1
1453617_at	27.2	27.2	52.8667	28.18	19.9333	31.4667	Zranb3	Mm.422265	zinc finger, RAN-binding domain containing 3
1455544_at	127.2	137.767	88.3	132.44	58.9333	127.4	Zranb3	Mm.422265	zinc finger, RAN-binding domain containing 3
1459436_at	14.1333	4.06667	20.5667	13.06	5.03333	6.96667	Zranb3	Mm.422265	Zinc finger, RAN-binding domain containing 3
1454652_at	5136.93	3125.7	2878.1	2171.6	2097.7	2601.47	Zranb2	Mm.259036	zinc finger, RAN-binding domain containing 2
1415712_at	740.433	646.3	805.9	604.42	358.267	863.6	Zranb1	Mm.397069	zinc finger, RAN-binding domain containing 1
1427200_at	757.567	593.833	818.467	625.34	391.7	857.5	Zranb1	Mm.397069	zinc finger, RAN-binding domain containing 1
1429512_at	40.6667	17.5667	60.5667	37.82	54.7667	41.6	Zpbp2	Mm.55996	zona pellucida binding protein 2
1460503_at	17.7667	26.7	23.6667	9.64	3.7	17.5333	Zpbp2	Mm.55996	zona pellucida binding protein 2
1450751_at	15.3667	21.6333	9.56667	18.68	7	26.8667	Zpbp	Mm.9500	zona pellucida binding protein
1453992_at	24.6333	49.9	15.5	35.86	15.3667	30.7	Zpbp	Mm.9500	zona pellucida binding protein
1417899_at	3.1	12.4333	3.6	12.14	5.86667	6.9	Zp3r	Mm.4644	zona pellucida 3 receptor
1445389_at	5.73333	7.6	1.7	2.44	2.9	7.36667	Zp3r	Mm.4644	Zona pellucida 3 receptor
1419007_at	28.6	35.6667	29.3667	37.96	33.6333	20.0667	Zp3	Mm.1381	zona pellucida glycoprotein 3
1449016_at	33.4333	30.9333	29.7667	28.5	23.5667	22.4667	Zp2	Mm.6510	zona pellucida glycoprotein 2
1450306_at	24.1667	20.1	62.8333	46.98	61.1333	57	Zp1	Mm.24767	zona pellucida glycoprotein 1
1449535_at	8.86667	5.8	15.2667	4.82	26.9	6.06667	Znrf4	Mm.76862	zinc and ring finger 4
1437646_at	82.9667	123.067	128.4	112.06	16.8	77.0667	Znrf3	Mm.216313	zinc and ring finger 3
1442447_at	20.1	69.8333	60.0333	25.68	35.1667	68.5	Znrf3	Mm.216313	Zinc and ring finger 3
1431154_at	7.86667	6.23333	10.6667	6.1	10.8667	9.66667	Znrf2	Mm.286149	zinc and ring finger 2
1434016_at	577.367	1104.17	1327.23	1018.78	874	1035.5	Znrf2	Mm.286149	zinc and ring finger 2
1455290_at	66.8333	102.067	76.4667	75.34	121.833	84.7333	Znrf2	Mm.392146	zinc and ring finger 2
1455291_s_at	402.3	734.767	581.2	324.58	564.933	507.933	Znrf2	Mm.392146	zinc and ring finger 2
1420949_at	106.533	146.8	153.033	125.76	153.733	140.067	Znrf1	Mm.271578	zinc and ring finger 1
1420950_at	206.7	283.133	526.9	217.58	305.2	310.433	Znrf1	Mm.271578	zinc and ring finger 1
1424384_a_at	421.133	2930.43	1932.97	3707.36	5028.53	2163.77	Znrf1	Mm.271578	zinc and ring finger 1
1422517_a_at	1073.7	1995.27	1519.87	2621.62	2284.67	1298.5	Znrd1	---	zinc ribbon domain containing, 1
1418657_at	83.7667	57.3333	94.4	110.62	118.033	60.7	Znhit4	Mm.27814	zinc finger, HIT type 4
1452880_at	546.833	376	282.133	230.72	576.533	535.1	Znhit3	Mm.379733	zinc finger, HIT type 3
1416651_at	435.9	427	378.767	556.14	494.067	252.333	Znhit2	Mm.2310	zinc finger, HIT domain containing 2
1425531_at	158.1	132.867	136.967	170.86	129.6	145.433	Znhit1	Mm.273147	zinc finger, HIT domain containing 1
1451745_a_at	1274.27	1217.83	1692.83	1351.36	1230.03	1052.33	Znhit1	Mm.273147	zinc finger, HIT domain containing 1
1436184_at	427.467	352.1	362	644.82	345.433	385.233	Znf512b	Mm.386888	zinc finger protein 512B
1441245_a_at	73.7	43.7	24.4	28.28	36.7333	63.8333	Znf512b	Mm.386888	zinc finger protein 512B
1419522_at	81.0667	67.8333	9.9	158.22	48.1	35.7667	Zmynd19	Mm.296106	zinc finger, MYND domain containing 19
1447403_a_at	87.3	70.4667	72.7	68.5	81.3333	35.3667	Zmynd19	Mm.296106	Zinc finger, MYND domain containing 19
1432001_at	66.8333	85.5	116.1	67.42	85.2333	244.267	Zmynd17	Mm.295241	zinc finger, MYND domain containing 17
1438498_at	48.5667	29.4333	37.4667	31.66	1173.9	197.167	Zmynd15	Mm.425692	zinc finger, MYND-type containing 15
1459815_at	31.9333	3.46667	2.3	11.18	8.53333	8.96667	Zmynd12	Mm.388911	zinc finger, MYND domain containing 12
1426531_at	2101.87	3166.73	3358.17	2788.96	2397.93	2440.1	Zmynd11	Mm.397307	zinc finger, MYND domain containing 11
1426532_at	363.3	419.333	460.467	389.42	306.633	417.367	Zmynd11	Mm.397307	zinc finger, MYND domain containing 11
1436153_a_at	8165.27	11242.1	18382.6	8572.84	7842.7	10214.7	Zmynd11	Mm.397307	zinc finger, MYND domain containing 11
1444461_at	64.6	28.6	30.5	22.06	36.0333	66.6	Zmynd11	Mm.397307	Zinc finger, MYND domain containing 11
1422750_a_at	71.0333	4.4	3.4	7.7	7.06667	5.43333	Zmynd10	Mm.28331	zinc finger, MYND domain containing 10
1434193_at	154.167	183	244.967	186.98	263.5	183.433	Zmym6	Mm.392655	zinc finger, MYM-type 6
1438685_at	806.233	717.9	620.467	263.62	945.367	502	Zmym6	Mm.276096	zinc finger, MYM-type 6
1429253_at	988.233	939.2	1134.53	877.7	652.933	743.733	Zmym4	Mm.165401	zinc finger, MYM-type 4
1438460_at	155.933	87.3667	157.567	63.58	80.6667	115.4	Zmym4	Mm.165401	zinc finger, MYM-type 4
1417794_at	518.8	189.367	150.8	284.84	250.2	140.2	Zmym3	Mm.23458	zinc finger, MYM-type 3
1447326_s_at	154.633	112.767	59.4333	93.32	121.6	59.4667	Zmym3	Mm.23458	zinc finger, MYM-type 3
1455017_a_at	187.1	84.9333	77.2667	134.42	154.5	113.967	Zmym3	Mm.23458	zinc finger, MYM-type 3
1459818_x_at	1157.23	425.733	432.433	276.4	390.933	414.7	Zmym3	Mm.23458	zinc finger, MYM-type 3
1428941_at	143.167	93.2667	83.4667	94.62	93.6333	105.067	Zmym2	Mm.31417	zinc finger, MYM-type 2
1452970_at	1558.6	2326.73	2594.73	1902.4	2162.07	1978.87	Zmym2	Mm.31417	zinc finger, MYM-type 2
1428052_a_at	280.3	365.8	311.067	125.86	338.933	115.133	Zmym1	Mm.273806	zinc finger, MYM domain containing 1
1427923_at	3921.47	7259.27	7511.83	5111.34	4492.1	6580.77	Zmpste24	Mm.34399	zinc metallopeptidase, STE24 homolog (S. cerevisiae)
1460739_at	686.2	529.8	499.267	545.78	545.867	451.8	Zmiz2	Mm.1144	zinc finger, MIZ-type containing 2
1441823_at	393.7	361.333	269.133	88.42	403	865.933	Zmiz1	Mm.227484	zinc finger, MIZ-type containing 1
1444505_at	48.8667	45.9	32.7	34.8	27.7333	46.4667	Zmiz1	Mm.227484	zinc finger, MIZ-type containing 1
1455984_at	30.4	8.96667	7.5	28.76	32.1333	26.7667	Zmiz1	Mm.227484	zinc finger, MIZ-type containing 1
1456816_at	187	235.133	156.933	98.68	302.5	362.4	Zmiz1	Mm.227484	Zinc finger, MIZ-type containing 1
1459305_at	144.5	107.267	120.467	38.94	127.5	198.2	Zmiz1	Mm.227484	Zinc finger, MIZ-type containing 1
1419366_at	174.4	89.1	109.133	146.82	139.833	105.767	Zmat5	Mm.271056	zinc finger, matrin type 5
1436141_at	91.9333	6.1	9.2	13.76	7	8.1	Zmat5	Mm.271056	zinc finger, matrin type 5
1433959_at	142.833	41.2667	20.9	23.04	13.4	7.16667	Zmat4	Mm.121274	zinc finger, matrin type 4
1438113_at	25.3	6.86667	7.66667	22.16	8.03333	18.9667	Zmat4	Mm.121274	zinc finger, matrin type 4
1459628_at	10.8333	2.83333	4.46667	8.96	10.8333	3.6	Zmat4	Mm.121274	Zinc finger, matrin type 4
1449353_at	1423.73	520.467	508.167	732.36	705.2	408.167	Zmat3	Mm.35705	zinc finger matrin type 3
1417536_at	3015.9	2132.27	2993.07	2060.84	1944.37	1358.63	Zmat2	Mm.251155	zinc finger, matrin type 2
1417537_at	109.233	139.433	163.5	117.02	167.4	105.167	Zmat2	Mm.251155	zinc finger, matrin type 2
1446079_at	257.367	278.833	290.067	107.54	185.167	303.6	Zmat2	Mm.251155	zinc finger, matrin type 2
1418033_s_at	130.533	137.8	135.267	130.18	182.533	188	Zkscan6	Mm.340052	zinc finger with KRAB and SCAN domains 6
1448920_at	98.7333	93.7333	145.033	89.48	111.3	107.933	Zkscan6	Mm.340052	zinc finger with KRAB and SCAN domains 6
1424892_at	239.367	198.033	107.267	187.66	190.7	163.167	Zkscan5	Mm.332842	zinc finger with KRAB and SCAN domains 5
1430562_at	9.1	30.3	28.6667	24.18	34.3333	19.9333	Zkscan5	Mm.332842	zinc finger with KRAB and SCAN domains 5
1415689_s_at	1486.27	2774.67	2028.83	1717.48	2669.17	1193.2	Zkscan3	Mm.296071	zinc finger with KRAB and SCAN domains 3
1422551_at	275.6	372.367	234.833	265.6	433.4	199	Zkscan3	Mm.296071	zinc finger with KRAB and SCAN domains 3
1437892_at	205.833	75.3333	74.6667	47.08	92.4	79.2	Zkscan3	Mm.296071	zinc finger with KRAB and SCAN domains 3
1434088_at	836.133	1812.03	1795.07	2342.52	1559.33	1506.8	Zkscan17	Mm.239793	zinc finger with KRAB and SCAN domains 17
1418607_at	202.633	233.167	149.633	217.9	308.367	107.833	Zkscan14	Mm.432480	zinc finger with KRAB and SCAN domains 14
1427948_a_at	84.8	131.467	157.7	148.22	136.167	91.7667	Zkscan14	Mm.432480	zinc finger with KRAB and SCAN domains 14
1452610_at	110.533	206.9	292.3	199.28	152.7	123.2	Zkscan14	Mm.432480	zinc finger with KRAB and SCAN domains 14
1418801_at	946.533	1223.8	1339.5	821.02	760.333	505.133	Zkscan1	Mm.213114	zinc finger with KRAB and SCAN domains 1
1429152_at	398.967	564.633	504.467	447.26	469.8	531.433	Zkscan1	Mm.213114	zinc finger with KRAB and SCAN domains 1
1439908_at	55.3667	62.1333	79.4667	52.52	57.1333	61.5	Zkscan1	Mm.213114	zinc finger with KRAB and SCAN domains 1
1440771_at	351.633	315.667	287.533	143.1	150.233	191.433	Zkscan1	Mm.213114	zinc finger with KRAB and SCAN domains 1
1447944_at	27.2333	13.3667	48.3333	14.82	34.7667	24.7	Zkscan1	Mm.213114	zinc finger with KRAB and SCAN domains 1
1453051_at	11.0667	9.36667	18.4333	14.28	8.03333	12.6	Zkscan1	Mm.213114	zinc finger with KRAB and SCAN domains 1
1427678_at	53.6	53.5	37.5333	48.48	83.8	41.4667	Zim3	Mm.381671	zinc finger, imprinted 3
1432297_at	24.8333	25.8	31.9333	15.26	36.1333	9	Zim2	Mm.159751	zinc finger, imprinted 2
1421405_at	25.7333	25.6	30.9333	9.54	22.6667	5.53333	Zim1	Mm.89976	zinc finger, imprinted 1
1421395_at	33.9	32.6667	39.1667	14.46	22.1333	29.3333	Zik1	Mm.49441	zinc finger protein interacting with K protein 1
1433946_at	344.033	120.067	90.2667	120.52	63.0333	87.7	Zik1	Mm.49441	zinc finger protein interacting with K protein 1
1421539_at	31.1667	46.5667	5.06667	30.34	5.86667	14.9333	Zic4	Mm.8062	zinc finger protein of the cerebellum 4
1456417_at	97.1667	53.6667	19.2	103.7	52.4333	37.9	Zic4	Mm.8062	zinc finger protein of the cerebellum 4
1423424_at	369.533	7205.7	11177.3	9043.34	16.4333	16.3333	Zic3	Mm.255890	zinc finger protein of the cerebellum 3
1438737_at	85.9333	2152.8	1612.8	2247.78	8.06667	7.83333	Zic3	Mm.255890	zinc finger protein of the cerebellum 3
1421301_at	138.867	611.033	662.867	358.96	4.76667	12.9	Zic2	Mm.308936	Zic finger protein of the cerebellum 2
1423477_at	1881.6	2429.5	183.333	2536.6	38.1	12.9	Zic1	Mm.335350	zinc finger protein of the cerebellum 1
1439627_at	3630.73	4240.33	497.4	1934.88	17.3667	24.8667	Zic1	Mm.335350	zinc finger protein of the cerebellum 1
1419791_at	25.3	27.5667	8.13333	15.44	14.5333	16.0333	Zhx3	---	zinc fingers and homeoboxes 3
1441454_at	156.4	300.533	275.467	206.62	297.4	200.467	Zhx3	Mm.431933	zinc fingers and homeoboxes 3
1442963_at	148.367	141.5	174.033	59.36	94.4333	204.533	Zhx3	---	zinc fingers and homeoboxes 3
1452977_at	700.333	1100.7	712.267	355.92	939.567	611.033	Zhx3	Mm.431933	zinc fingers and homeoboxes 3
1454289_at	5.86667	12.0667	7.63333	14.18	19.1667	6.1	Zhx3	Mm.431933	zinc fingers and homeoboxes 3
1456979_at	203.133	295.033	184.1	76.3	100.3	187.867	Zhx3	Mm.431933	Zinc fingers and homeoboxes 3
1457710_at	3.93333	4.63333	5	4.68	4.6	13.8667	Zhx3	Mm.431933	zinc fingers and homeoboxes 3
1455210_at	165	149.467	269.567	127.68	171.533	189.7	Zhx2	Mm.36557	zinc fingers and homeoboxes protein 2
1448875_at	1856.8	3108.93	2719.3	2012.4	1882.6	2295.17	Zhx1	Mm.244931	zinc fingers and homeoboxes protein 1
1458382_a_at	12.6667	267.867	166.067	16.1	102.867	231.133	Zhx1	Mm.244931	zinc fingers and homeoboxes protein 1
1429118_a_at	10.7333	26.1	7.53333	23.58	12.9	9.9	Zh2c2	Mm.86090	zinc finger, H2C2 domain containing
1429728_at	320.133	299.6	202.367	211.02	265.3	291.733	Zh2c2	Mm.86090	zinc finger, H2C2 domain containing
1424548_at	395.8	452.6	290.4	409.14	504.033	191.7	Zgpat	Mm.272712	zinc finger, CCCH-type with G patch domain
1440348_at	469.533	706.167	943.4	599.34	595.533	697.167	Zfyve9	---	zinc finger, FYVE domain containing 9
1434504_at	214.267	26.8333	64.6333	39.52	65.7667	81.4	Zfyve28	Mm.113388	zinc finger, FYVE domain containing 28
1443669_at	142.733	46.5	48.2667	39.76	48.5667	93.5667	Zfyve28	Mm.113388	Zinc finger, FYVE domain containing 28
1424550_at	571.633	312.2	214.6	308.44	307.367	289.433	Zfyve27	Mm.287359	zinc finger, FYVE domain containing 27
1424551_at	3.6	6.53333	5.66667	8.76	14.0333	10.1333	Zfyve27	---	zinc finger, FYVE domain containing 27
1439841_at	141.233	95.3667	84.0667	36.74	64.2333	104.5	Zfyve27	Mm.103731	zinc finger, FYVE domain containing 27
1460026_s_at	936.933	435.9	835.2	229.94	429.333	578.9	Zfyve27	Mm.103731	zinc finger, FYVE domain containing 27
1452306_at	699.167	364.6	247.3	240.26	544.4	397.5	Zfyve26	Mm.297919	zinc finger, FYVE domain containing 26
1424669_at	428.267	131.8	62.1333	240.14	252.067	160.767	Zfyve21	Mm.390497	zinc finger, FYVE domain containing 21
1424670_s_at	2277.93	1135.4	636.167	1271.04	1304.97	1030.77	Zfyve21	Mm.390497	zinc finger, FYVE domain containing 21
1429517_at	64.0333	55	114.833	25.46	27.2667	87.1333	Zfyve20	Mm.290734	zinc finger, FYVE domain containing 20
1435093_at	969.567	1045.9	807.567	881.7	1085.43	840.167	Zfyve20	Mm.290734	zinc finger, FYVE domain containing 20
1456754_at	657.367	686.467	617.433	488.2	819.067	448.4	Zfyve20	Mm.290734	zinc finger, FYVE domain containing 20
1451380_at	469.467	459.133	421.233	374.98	516	281.9	Zfyve19	Mm.386807	zinc finger, FYVE domain containing 19
1447947_at	286.567	328.9	207.733	115.1	253	262.933	Zfyve16	Mm.259585	zinc finger, FYVE domain containing 16
1435071_at	109.6	72.3667	58.7333	87.42	126.533	34.7	Zfyve1	Mm.59257	zinc finger, FYVE domain containing 1
1435072_at	271.567	225.8	259.867	212.3	439.3	195.667	Zfyve1	Mm.59257	zinc finger, FYVE domain containing 1
1449978_at	8.43333	3.6	29.3	5.46	2.33333	8.06667	Zfy2	Mm.411381	zinc finger protein 2, Y linked
1420759_s_at	5.53333	9.1	4.6	7.02	2.66667	18.6333	Zfy1 /// Zfy2	Mm.411381	zinc finger protein 1, Y linked /// zinc finger protein 2, Y linked
1421630_at	23.5333	13.6	26.9333	13.78	19.4	29.9333	Zfy1 /// Zfy2	Mm.411381	zinc finger protein 1, Y linked /// zinc finger protein 2, Y linked
1419565_a_at	163.167	286.767	222.2	208.94	341.533	293.467	Zfx	Mm.919	zinc finger protein X-linked
1425972_a_at	525.233	1241.7	1046.4	734.42	948.7	868.433	Zfx	Mm.919	zinc finger protein X-linked
1428046_a_at	104.967	444.567	519.567	199.02	357.4	455.033	Zfx	Mm.919	zinc finger protein X-linked
1449512_a_at	31.2667	53.6	44.8	51.6	24.7667	68.3667	Zfx	Mm.919	zinc finger protein X-linked
1419650_at	3692.73	2144.37	1799.43	2261.16	2329	2237.03	Zfr	Mm.273496	zinc finger RNA binding protein
1442311_at	116.667	114.1	84.9333	41.42	98.9667	206.767	Zfr	Mm.273496	Zinc finger RNA binding protein
1443002_at	120.867	85.5667	77.5	23.72	72.6333	114.367	Zfr	Mm.273496	zinc finger RNA binding protein
1443353_at	36.5333	28.5667	16.7	32.66	43.4	63.6333	Zfr	Mm.273496	Zinc finger RNA binding protein
1443357_at	20.8667	24.3333	14.3	6.56	5.4	20.1667	Zfr	Mm.273496	Zinc finger RNA binding protein
1444096_at	186.9	183.8	118.833	116.56	132	322.7	Zfr	Mm.273496	Zinc finger RNA binding protein
1449552_at	151.433	118.733	149.633	170.78	249.433	236	Zfr	Mm.273496	zinc finger RNA binding protein
1458450_at	49.6	20	24.2667	14.62	38.9	72.5	Zfr	Mm.273496	zinc finger RNA binding protein
1419012_at	51.2	39.2333	18.6	56.18	82.1333	31.6667	Zfpm2	Mm.39496	zinc finger protein, multitype 2
1444803_at	24.5667	3.76667	5.16667	16.88	17.0667	13.6	Zfpm2	Mm.39496	Zinc finger protein, multitype 2
1447020_at	81.5667	9.96667	11.7333	5.2	28.2667	51.4	Zfpm2	Mm.39496	Zinc finger protein, multitype 2
1449314_at	526.367	14.8	42.0333	49.94	613.367	426.133	Zfpm2	Mm.39496	zinc finger protein, multitype 2
1423603_at	36.0333	76.3333	38.0667	72.78	181.1	43.2667	Zfpm1	Mm.390068	zinc finger protein, multitype 1
1451046_at	440.5	1160.3	1061.23	1027.94	2780.9	661.7	Zfpm1	Mm.390068	zinc finger protein, multitype 1
1417119_at	224.867	227.367	198.233	253.5	310.633	240.9	Zfpl1	Mm.289471	zinc finger like protein 1
1444149_at	59.4333	29.1667	31.1333	21.54	31	25.2667	Zfp96	Mm.24124	zinc finger protein 96
1451281_at	115.3	185.3	144.533	114.72	162.767	84.8667	Zfp96	Mm.24124	zinc finger protein 96
1419521_at	135.833	92.1	46.6	40.18	54.3333	21.8333	Zfp94	Mm.295762	zinc finger protein 94
1418955_at	199.833	219.933	153.8	143.7	229.6	97.3333	Zfp93	Mm.5066	zinc finger protein 93
1441876_x_at	149.667	141.667	110.267	52.24	103.1	43.7	Zfp93	Mm.5066	Zinc finger protein 93
1421710_at	103.833	39.3	48.0333	61.7	28.6667	55.2667	Zfp92	Mm.5060	zinc finger protein 92
1426326_at	1035	1922.87	3366.37	2470.34	1115.27	2002.3	Zfp91	Mm.290924	zinc finger protein 91
1429615_at	1769	2141.8	2701.37	2018.88	1438.77	1808	Zfp91	Mm.290924	zinc finger protein 91
1429616_at	145.6	128.467	228.7	182.34	93.5333	233.4	Zfp91	Mm.290924	zinc finger protein 91
1459444_at	33.3	23.8333	28.1	11.28	30.6667	62.9	Zfp91	Mm.290924	zinc finger protein 91
1440334_at	57.8333	20.1	44.0333	24.7	30.9	40.8	Zfp90	Mm.295582	Zinc finger protein 90
1449126_at	267.933	181.7	146.133	152.96	281.3	131.167	Zfp90	Mm.295582	zinc finger protein 90
1456483_at	308.167	174.6	92.0667	200.34	262.233	92.8333	Zfp9	Mm.106970	zinc finger protein 9
1418291_at	211.9	196.1	117.867	96.6	191.633	51.6333	Zfp87	Mm.315879	zinc finger protein 87
1425209_at	76.5333	137.733	92.9333	128.78	143.467	123.333	Zfp84	Mm.251083	zinc finger protein 84
1425210_s_at	112.833	293.2	113.2	122.84	325.767	81.1	Zfp84	Mm.251083	zinc finger protein 84
1435916_at	262.367	201.267	73.3667	102.32	161.5	115.967	Zfp84	Mm.251083	zinc finger protein 84
1452319_at	238.333	330.567	234.433	94.26	217	100.633	Zfp82	Mm.295906	zinc finger protein 82
1458925_at	12.1333	8.43333	38.6	17.62	36.1333	22.6	Zfp82	Mm.295906	zinc finger protein 82
1455945_at	118.567	65.2333	56.2667	24.8	64.2667	31.3667	Zfp817	---	zinc finger protein 817
1443930_at	62.1667	12	12.3333	14.36	20.0333	10.0667	Zfp811	Mm.390960	zinc finger protein 811
1451566_at	351.867	676.2	566.933	509.6	327.233	432.233	Zfp810	Mm.306038	zinc finger protein 810
1444076_at	372.3	231.267	181.3	139.76	189.933	105.4	Zfp81	---	zinc finger protein 81
1457685_at	4.76667	10.9667	9.7	11.3	15.6667	13.3667	Zfp81	Mm.170029	zinc finger protein 81
1437694_at	24.8667	36.2333	23.5	21.38	31.4667	37.9	Zfp809	Mm.290849	Zinc finger protein 809
1440890_a_at	439.7	870.933	645.467	215.56	463.067	356.433	Zfp809	Mm.290849	zinc finger protein 809
1443036_at	236.667	7.96667	5.03333	10.22	8.36667	19.9333	Zfp804a	Mm.119383	zinc finger protein 804A
1457361_at	84.2333	10.5333	21.4	4.74	11.8333	7.63333	Zfp804a	Mm.119383	zinc finger protein 804A
1435015_at	181.633	191.6	141.533	369.86	276.267	136.533	Zfp787	Mm.3254	zinc finger protein 787
1437925_at	29.1333	57	53.6667	30.34	69.0667	63.6667	Zfp787	Mm.3254	Zinc finger protein 787
1441703_at	35.8	46.3	48.8667	59.98	51.1	54.2333	Zfp787	Mm.3254	zinc finger protein 787
1456869_at	36.7	52.6667	58.8667	58.36	53	53.1	Zfp787	Mm.3254	zinc finger protein 787
1457592_x_at	73.9667	103.267	161.067	157.6	131.667	131.533	Zfp787	Mm.3254	zinc finger protein 787
1458214_at	19.0333	20.6	41.1333	40.54	43	38.4667	Zfp786	Mm.128149	zinc finger protein 786
1438689_at	83.9	70.0333	87.4667	59.84	53.1	47.4667	Zfp784	Mm.333548	zinc finger protein 784
1446349_at	29.5333	39.7	69.9333	17.94	28.1667	24.1333	Zfp78	Mm.136456	zinc finger protein 78
1458412_at	76.1333	84.7333	79.0667	23.1	115.067	46.4667	Zfp78	Mm.136456	zinc finger protein 78
1429541_at	416.667	274.667	310.667	251.42	336.7	238.7	Zfp777	Mm.381553	zinc finger protein 777
1444359_at	52.7333	97.5	75	85.62	28.8	12.6	Zfp777	Mm.381553	Zinc finger protein 777
1454873_at	196.033	257.367	164.933	120.66	175.333	104.633	Zfp775	Mm.437087	zinc finger protein 775
1440817_x_at	2771.6	3134.87	2826.07	1281.12	1575.03	1007.27	Zfp771	Mm.41038	zinc finger protein 771
1440971_x_at	544.967	502.867	325.333	291.98	254.567	140.367	Zfp771	Mm.41038	zinc finger protein 771
1447587_at	32.1667	8.63333	10.3	21.68	9.56667	3.56667	Zfp771	Mm.41038	Zinc finger protein 771
1447588_x_at	24.7	28.4667	6.46667	11.66	15.3667	11.5333	Zfp771	Mm.41038	Zinc finger protein 771
1456757_at	21.5	17.4667	6.86667	8.46	19.3667	13.9	Zfp771	Mm.41038	zinc finger protein 771
1460078_at	21.5	17.0333	3.7	31.18	8.13333	5.96667	Zfp771	Mm.41038	zinc finger protein 771
1434682_at	867.367	250.167	250.1	125.16	159.467	200.667	Zfp770	Mm.132523	zinc finger protein 770
1437305_at	107.733	66.5333	91.6667	55.3	72.8667	73.1667	Zfp770	Mm.132523	zinc finger protein 770
1424506_at	133.533	157.933	173.233	174.8	182.4	85.1333	Zfp768	Mm.23031	zinc finger protein 768
1424916_x_at	362.2	790.633	958.367	402.18	833.133	837.1	Zfp764	Mm.297097	zinc finger protein 764
1440226_at	744.033	647.267	388.133	272.2	360.267	187.467	Zfp760	Mm.34723	zinc finger protein 760
1445270_at	74.7333	35.7	23.0333	12.76	7.9	7.33333	Zfp759	Mm.56274	Zinc finger protein 759
1452623_at	118.833	134.133	47.5	23.3	67.3667	41	Zfp759	Mm.56274	zinc finger protein 759
1451902_at	314.3	563.9	510.667	173.5	436.4	396.033	Zfp758	Mm.390945	zinc finger protein 758
1437469_at	8.23333	7.1	15	7.62	28.0667	2.73333	Zfp750	Mm.11395	zinc finger protein 750
1439558_at	319.9	290.467	290.133	116.66	107.1	173.7	Zfp75	Mm.67366	zinc finger protein 75
1456324_at	112.133	82	88.2	19.7	70.2667	68.1333	Zfp748	Mm.422831	zinc finger protein 748
1435243_at	324.733	803.1	505.833	505.98	837.933	303.667	Zfp746	Mm.207555	zinc finger protein 746
1441041_at	88.7667	34.1	33.5333	44.58	40	78	Zfp746	Mm.207555	Zinc finger protein 746
1453013_at	1146.43	867.367	682.8	681.38	907.833	638.9	Zfp740	Mm.352945	zinc finger protein 740
1453230_at	433	392.5	411.667	212.6	284.633	208.2	Zfp74	Mm.371648	zinc finger protein 74
1424752_x_at	802.933	641.567	443.1	288.4	454.3	377.267	Zfp71-rs1	---	zinc finger protein 71, related sequence 1
1436594_at	196.667	206.233	170.567	126.34	235.8	155.033	Zfp719	Mm.234422	zinc finger protein 719
1443985_at	111.4	43.9333	61.3667	30.98	52.0667	54.3667	Zfp719	Mm.234422	zinc finger protein 719
1432439_at	16.3	56.7	52.4333	38.98	154.167	26.4333	Zfp715	Mm.45367	zinc finger protein 715
1434461_at	1510.37	3476.4	2814.87	1943.52	7306.37	1680.6	Zfp715	Mm.45367	zinc finger protein 715
1430212_at	61.2667	72.5333	48.8333	16.38	62.5333	35.7667	Zfp712	Mm.297247	zinc finger protein 712
1440778_x_at	289.967	363.2	351.667	125.48	209.233	108.533	Zfp712	Mm.297247	Zinc finger protein 712
1432750_at	468.767	187.9	276.933	572.76	15.6	429	Zfp711	Mm.259846	zinc finger protein 711
1454334_at	6.66667	2.93333	14.6	1.66	5.03333	18.9333	Zfp711	Mm.259846	zinc finger protein 711
1435168_at	316.033	204.1	209.6	315.06	1134.33	322	Zfp710	Mm.290925	zinc finger protein 710
1435954_at	52.1	36.2667	11.1333	60.52	74.7	9.5	Zfp710	Mm.290925	zinc finger protein 710
1453601_at	193.7	103.433	111.033	115.72	558.533	248.833	Zfp710	Mm.290925	zinc finger protein 710
1451518_at	79.5667	38.4333	29.3333	10.66	33.2333	29.6333	Zfp709	Mm.290790	zinc finger protein 709
1459386_at	54.1333	36.3	35.1333	39.14	59.1333	41.8	Zfp709	Mm.290790	zinc finger protein 709
1435471_at	23.7	27.4667	27.4	7.24	34	11.2333	Zfp708	Mm.124021	zinc finger protein 708
1439751_at	83.4	64.9667	138.6	29.48	133.867	39.1333	Zfp708	Mm.124021	Zinc finger protein 708
1427093_at	141.467	122	155.867	142.06	125.633	58.7	Zfp707	Mm.294295	zinc finger protein 707
1441842_s_at	172.6	327.467	545.767	204.86	193.4	105.133	Zfp707	Mm.294295	zinc finger protein 707
1426678_at	5358.43	2842.83	1923.07	2704.12	3241.6	2112.33	Zfp706	Mm.371631	zinc finger protein 706
1426679_at	1811	1004.73	759.467	1707.74	1729.93	1359.5	Zfp706	Mm.371631	zinc finger protein 706
1436686_at	17.7667	28.1	24.3	13.16	17.9333	36.2333	Zfp706	Mm.371631	zinc finger protein 706
1436687_x_at	128.7	50.9	61.0667	72	44.6333	122.8	Zfp706	Mm.371631	zinc finger protein 706
1440710_at	22.2	38.0333	10.2	48.82	40.4333	29.2667	Zfp706	Mm.371631	zinc finger protein 706
1456177_x_at	12129	8642.17	8324.67	7531.7	8846.77	7158.87	Zfp706	Mm.371631	zinc finger protein 706
1417848_at	1320.83	675.9	598.667	925.78	484.567	1169.37	Zfp704	Mm.212908	zinc finger protein 704
1417849_at	720.533	470.7	419.833	630.12	275.233	532.367	Zfp704	Mm.212908	zinc finger protein 704
1459462_at	47.1333	44.6	34.7333	21.7	18.7	96.8	Zfp704	Mm.212908	Zinc finger protein 704
1436026_at	881.167	1498.87	1112.57	2821.96	701.5	1475.93	Zfp703	Mm.212469	zinc finger protein 703
1439891_at	11.2333	10.2	21	20.18	11.3333	12.4667	Zfp703	Mm.212469	Zinc finger protein 703
1444202_at	5.96667	8.93333	27.6	9.9	11.1667	8.86667	Zfp703	Mm.212469	zinc finger protein 703
1451323_at	72.9	206.733	161.067	71.66	32.3333	37.1667	Zfp7	Mm.38948	zinc finger protein 7
1427594_at	70.4333	25	60.1333	24.58	11.2333	52.2333	Zfp697	Mm.402718	zinc finger protein 697
1440999_at	175.933	270.633	172.5	249.06	699.967	594.467	Zfp697	Mm.402718	zinc finger protein 697
1434031_at	879.633	510.4	268.767	352.22	465.3	733.467	Zfp692	Mm.41440	zinc finger protein 692
1456912_at	378.033	281.3	373.867	414.78	333.367	162.267	Zfp691	Mm.169620	zinc finger protein 691
1458274_at	199.733	640.5	752.567	1530.26	1771.13	369.733	Zfp69	Mm.331840	zinc finger protein 69
1427970_at	96.3333	77.9667	66.1	52.58	63.9	43.0333	Zfp689	Mm.389962	zinc finger protein 689
1438733_at	55.1333	45.4333	43.6333	57.58	59.8667	54.4667	Zfp689	---	zinc finger protein 689
1453116_at	119.1	124.2	75.2333	59.48	144.467	47.6667	Zfp689	Mm.389962	zinc finger protein 689
1456723_at	45.9667	61	40.0333	40.34	60.8667	23.0667	Zfp689	Mm.423237	Zinc finger protein 689
1452588_at	174.867	75.7	22.8333	14.74	33.3333	14.4333	Zfp688	Mm.20301	zinc finger protein 688
1428687_at	280.167	188.8	179.4	244.22	273.133	219.533	Zfp687	Mm.389478	zinc finger protein 687
1417549_at	339.9	727.4	715.267	344.54	307.733	349.7	Zfp68	Mm.27575	zinc finger protein 68
1448760_at	291.233	956.467	949	425.72	419.1	530.167	Zfp68	Mm.27575	zinc finger protein 68
1457571_at	169.667	306.533	310.067	87.16	123.033	97.9667	Zfp68	Mm.27575	zinc finger protein 68
1459979_x_at	91.7	133.467	109.967	72.2	126.3	122.167	Zfp68	Mm.27575	Zinc finger protein 68
1424261_at	522.2	694.733	474.567	364.76	466.4	452.733	Zfp672	Mm.72124	zinc finger protein 672
1441135_at	32.3667	44.3	30.1333	18.5	33.2667	27.4	Zfp672	Mm.72124	Zinc finger protein 672
1445182_at	2.46667	3.6	4.9	2.56	19.2667	2.23333	Zfp672	Mm.72124	Zinc finger protein 672
1454986_at	106.2	91.6	69.6	161.44	79.7	58.9667	Zfp668	Mm.207872	zinc finger protein 668
1458563_at	34.2	51.4	67.2667	51.72	34.7333	49.8333	Zfp668	Mm.207872	zinc finger protein 668
1436122_at	385.8	334.667	308.2	289.58	412.1	227.067	Zfp667	Mm.276279	zinc finger protein 667
1434063_at	2368.17	3114.33	2480.43	2524.76	1083.03	1654.33	Zfp664	Mm.138617	zinc finger protein 664
1437047_at	77.9667	42.3333	59.8333	76.16	14.0667	55.8667	Zfp664	Mm.138617	zinc finger protein 664
1428704_at	126.067	67.5	56.2667	101.38	95.8	66.2	Zfp661	Mm.46715	zinc finger protein 661
1428341_at	935.867	1676.7	2236.67	1346.9	1147.87	1131.77	Zfp655	Mm.206555	zinc finger protein 655
1429217_at	394.867	387.867	454.033	328.22	413.6	409.933	Zfp655	Mm.206555	zinc finger protein 655
1431252_a_at	88.8	153.267	195.3	174	157.3	162.1	Zfp655	Mm.206555	zinc finger protein 655
1427969_s_at	317	263.433	216.233	109.92	194.9	182.333	Zfp654	Mm.25960	zinc finger protein 654
1435481_at	308.667	236.267	239.367	298.96	302.533	313.5	Zfp653	Mm.347707	zinc finger protein 653
1434720_at	100.7	95.8667	94.3	89.2	313.267	76.4	Zfp652	Mm.389038	zinc finger protein 652
1442770_at	23.3	41.3333	88.7333	30	62.1	22.8333	Zfp652	Mm.389038	zinc finger protein 652
1456520_at	413.567	728.067	909.3	668.12	1820.83	1004.37	Zfp652	Mm.389038	zinc finger protein 652
1435360_at	623.933	183.5	164.067	284.1	66.9667	150.2	Zfp651	Mm.436587	zinc finger protein 651
1439542_at	396.7	36.1667	49.1667	53.16	12.7667	48.1333	Zfp651	Mm.436587	zinc finger protein 651
1443453_at	41.5	44.7	22.8667	56.3	43.2	30.6333	Zfp651	Mm.436587	zinc finger protein 651
1429107_at	445.267	516.933	393.033	598.12	644.8	722.5	Zfp650	Mm.314576	zinc finger protein 650
1444469_at	52.9	75.4333	47.3	48.32	73.2333	42.5	Zfp650	Mm.314576	zinc finger protein 650
1453029_s_at	2866.6	3356.17	4014	3116.42	2390.43	3619.97	Zfp650	Mm.314576	zinc finger protein 650
1460455_at	1606	927.367	873.4	691.26	623.133	840.833	Zfp650	Mm.314576	zinc finger protein 650
1455633_at	473.133	963.3	670.5	555.96	783.333	352.133	Zfp647	Mm.183650	zinc finger protein 647
1439212_at	30.3667	45.3	45.6	19	23.5	23.6	Zfp646	---	zinc finger protein 646
1459901_at	137.333	198.733	208.467	169.8	334.967	136.333	Zfp646	---	zinc finger protein 646
1419983_at	50.4333	20.1	24.1	13.56	16.9333	17.1	Zfp644	Mm.249474	zinc finger protein 644
1419984_s_at	1180.1	1037.83	686.267	625.72	735.3	1043.6	Zfp644	Mm.249474	zinc finger protein 644
1429623_at	752.2	536.3	377.367	384.9	451.567	597.533	Zfp644	Mm.249474	zinc finger protein 644
1436985_at	460.8	318.333	396.067	540.22	384.7	465	Zfp644	Mm.249474	zinc finger protein 644
1439769_at	60.7	135.233	162.9	55.72	80.2667	104.1	Zfp644	Mm.249474	Zinc finger protein 644
1449691_at	55.2	39.1667	35.6667	50.38	32.5667	72.5667	Zfp644	Mm.249474	Zinc finger protein 644
1459162_at	25	26.1667	13.4	15.06	6.93333	15.5	Zfp644	Mm.249474	Zinc finger protein 644
1421030_at	373.2	293.233	384.567	409.28	368.567	343.767	Zfp64	Mm.2095	zinc finger protein 64
1430117_a_at	50.5667	37.3	58	93.24	34.7	74.2667	Zfp64	Mm.2095	zinc finger protein 64
1430938_at	55.6667	23.5333	36.3	52.18	49.8667	15.6333	Zfp64	Mm.2095	zinc finger protein 64
1438140_a_at	89.7	35.6667	54.7333	73.06	75.5	64.2	Zfp64	Mm.2095	zinc finger protein 64
1440251_s_at	11.8667	3.43333	16.9	5.84	4.16667	3.66667	Zfp64	Mm.2095	zinc finger protein 64
1441492_at	44.6333	5.5	65.5333	9.94	47.1	47.2	Zfp64	Mm.2095	Zinc finger protein 64
1451696_at	63.1333	28.7667	102.133	35	20.4667	43.9667	Zfp64	Mm.2095	zinc finger protein 64
1456431_at	93.0667	97.6667	118.233	105.26	117.033	120.8	Zfp64	Mm.2095	zinc finger protein 64
1424237_at	846.8	880.2	648.933	615.64	995.8	666.333	Zfp639	Mm.285620	zinc finger protein 639
1434689_at	1388.83	874.233	469.767	969.38	782.633	386.233	Zfp637	Mm.290847	zinc finger protein 637
1436537_at	451.4	398.067	354.033	301.9	402.133	251	Zfp629	Mm.156718	zinc finger protein 629
1438742_at	4.76667	2.86667	16.7	5.46	4.83333	4.16667	Zfp629	Mm.156718	zinc finger protein 629
1419787_a_at	504.033	487.367	728	570.56	561	789.767	Zfp628	Mm.27442	zinc finger protein 628
1426625_at	602.367	749.9	846.5	590.28	780.033	373.667	Zfp623	Mm.273264	zinc finger protein 623
1425030_at	313.667	339.767	474.867	573.1	693.333	349	Zfp622	Mm.29145	zinc finger protein 622
1438000_x_at	7122.03	11659.3	19702.9	9911.2	12418.8	11286.1	Zfp622	Mm.29145	zinc finger protein 622
1446477_at	42.5	13.9	20.8333	22.28	16.3	16.7	Zfp622	Mm.29145	zinc finger protein 622
1447775_x_at	248.8	388.333	510.567	379.64	583.667	333.067	Zfp622	Mm.29145	zinc finger protein 622
1453158_at	19.5	22.3667	16.4333	8.9	5.8	46.7	Zfp622	Mm.29145	zinc finger protein 622
1425495_at	497.467	469.967	269.8	102.12	366.167	483.333	Zfp62	Mm.16650	zinc finger protein 62
1451730_at	100.533	106.267	67.4	25.94	105.967	103.567	Zfp62	Mm.16650	zinc finger protein 62
1436190_at	124.3	190.933	122.967	733.28	143.467	26.2333	Zfp618	Mm.26479	zinc fingerprotein 618
1453247_at	95.0333	91.1667	52.9	638.42	75.1	12.0333	Zfp618	Mm.26479	zinc fingerprotein 618
1454087_at	25.4	42.9	36.1333	88.26	39.1333	43.5	Zfp618	Mm.26479	zinc fingerprotein 618
1434355_at	972.3	1007.13	602.067	620.88	366.733	335.733	Zfp617	Mm.251482	zinc finger protein 617
1443640_at	123.733	56.0333	70.9333	40.36	41.0333	33.3667	Zfp617	Mm.251482	Zinc finger protein 617
1443931_at	48	53.3333	52.6667	26.5	36.8667	46.2	Zfp617	Mm.251482	Zinc finger protein 617
1449546_a_at	559.1	279.667	346.367	185.82	127.133	173.467	Zfp617	Mm.251482	zinc finger protein 617
1427104_at	1087	22.6667	24.8667	23.74	24.1333	33.6333	Zfp612	Mm.87487	zinc finger protein 612
1456824_at	217.667	12.2667	11.1333	8.2	14.4333	31.8333	Zfp612	Mm.403714	zinc finger protein 612
1459066_at	27.4	10.4	12.3667	16.86	5.53333	9.16667	Zfp612	---	zinc finger protein 612
1417363_at	230.167	175.367	164.967	147.08	151.733	103.067	Zfp61	Mm.12832	zinc finger protein 61
1442535_at	127.833	81.8333	46.7333	83.72	113.167	225.967	Zfp609	Mm.139231	Zinc finger protein 609
1447010_at	31.5333	33.3	42.6333	30.36	45.4333	49.7667	Zfp609	Mm.139231	Zinc finger protein 609
1459417_at	69.5	31.9333	65.2	35.44	22	58.9333	Zfp609	Mm.139231	Zinc finger protein 609
1442784_at	31.2	28.1	63.5667	35.58	27.7667	60.5	Zfp608	Mm.192984	Zinc finger protein 608
1429799_at	52.4667	57.4333	46.8333	58.78	29	43.8333	Zfp606	Mm.98929	zinc finger protein 606
1436429_at	66.1	56.5667	58.3667	35.16	25.7667	67	Zfp606	Mm.98929	zinc finger protein 606
1454951_at	286.9	167.9	149.633	138.88	94.4	75.7667	Zfp606	Mm.98929	zinc finger protein 606
1422954_at	20.6	20.4667	19.3	10.1	15.1667	33.0333	Zfp60	Mm.66913	zinc finger protein 60
1430187_at	121.633	61.1	43.8667	46.2	38.9333	24.8333	Zfp60	Mm.348021	zinc finger protein 60
1460691_at	832.433	1385.3	1266.7	1508.86	1339.47	1832.33	Zfp598	Mm.219581	zinc finger protein 598
1430184_at	27.9333	59.4	32.3	32.74	86.1333	65.7667	Zfp597	Mm.379190	zinc finger protein 597
1435556_at	393.6	351.933	572.7	427.46	326.333	519	Zfp597	Mm.379190	zinc finger protein 597
1443102_at	13.2667	9.06667	2.93333	16.88	4.96667	19.3	Zfp597	Mm.379190	zinc finger protein 597
1460589_at	89.0333	152.067	148.133	76.58	93.4667	134.8	Zfp597	Mm.379190	zinc finger protein 597
1447703_x_at	306.367	189.533	311.167	243.06	179.467	299.867	Zfp593	Mm.300404	zinc finger protein 593
1449946_a_at	136.1	117.067	164.067	77.86	130.8	157.733	Zfp593	Mm.300404	zinc finger protein 593
1434160_at	366.933	503.6	569.8	565.1	624.7	611.033	Zfp592	Mm.29525	zinc finger protein 592
1454864_at	200.1	351.867	227.167	306.68	362.367	263.967	Zfp592	Mm.29525	zinc finger protein 592
1460620_at	239.633	332.333	360.2	212.56	369.1	393.4	Zfp592	Mm.392676	zinc finger protein 592
1421703_at	13.5333	24.1667	16.3	20.16	12.9667	17.9333	Zfp59	Mm.379046	zinc finger protein 59
1444779_s_at	144.2	169.133	169.467	80.7	158.8	117.6	Zfp59	Mm.379046	zinc finger protein 59
1458288_at	7.43333	33.3333	10.0333	15.62	8.1	17.6	Zfp59	Mm.379046	Zinc finger protein 59
1439861_at	69.7333	60.8333	74.9667	35.02	104.5	40.2333	Zfp583	Mm.333558	zinc finger protein 583
1429634_at	184.867	155.867	228.333	221.38	192.9	131.2	Zfp580	Mm.41484	zinc finger protein 580
1456707_at	20.4667	32.1667	43.4667	21.46	18.6	28.8	Zfp580	Mm.41484	Zinc finger protein 580
1428564_at	672.833	167.067	134.867	220	243.533	193.233	Zfp579	Mm.76400	zinc finger protein 579
1447359_at	35.5667	13.4667	8.6	11.02	15.5333	9.2	Zfp575	Mm.20117	zinc finger protein 575
1434128_a_at	1123.33	1202.33	1388.93	643	1206.07	1037.7	Zfp574	Mm.41568	zinc finger protein 574
1435202_at	196.3	199.967	156.733	161.66	248	156.833	Zfp574	Mm.41568	zinc finger protein 574
1456486_at	50.9333	49	31.7	58.88	73.4333	38.9667	Zfp574	Mm.41568	zinc finger protein 574
1450929_at	4.93333	9.3	6.06667	25.86	19.6667	24.6	Zfp57	Mm.305561	zinc finger protein 57
1435091_at	182.867	403.033	472.967	675	298.1	348.8	Zfp568	Mm.322432	zinc finger protein 568
1439879_at	18.8	25.1333	20.0333	14.92	15.3333	18.3667	Zfp568	Mm.322432	Zinc finger protein 568
1459929_at	15.7667	14.7	23.2667	23.78	24.1	11.4	Zfp568	Mm.322432	zinc finger protein 568
1425007_at	208.733	237.633	333.267	169.24	276.167	161.133	Zfp566	---	zinc finger protein 566
1442648_at	151.3	157.533	72.8333	45.1	70.8667	47.1333	Zfp563	Mm.121392	zinc finger protein 563
1438026_at	678.7	605.267	760	854.58	455.767	369.367	Zfp560	Mm.379669	zinc finger protein 560
1458820_at	90.9333	175	104.8	32.08	81.7	39.2667	Zfp560	Mm.379669	zinc finger protein 560
1430973_at	5.06667	3.53333	4.26667	9.3	5.46667	6.06667	Zfp558	Mm.289689	zinc finger protein 558
1453912_at	8.83333	11.4333	1.76667	9.72	21.1333	8.1	Zfp558	Mm.289689	zinc finger protein 558
1426563_at	46.6667	46.9	23.8	18.7	34.7333	13.3	Zfp553	Mm.258371	zinc finger protein 553
1426564_at	291.867	197.867	277.867	128.32	190.3	98.8	Zfp553	Mm.258371	zinc finger protein 553
1437705_at	50.7	91.3667	36.8333	49.74	7.9	7.76667	Zfp551	Mm.361832	zinc fingr protein 551
1419239_at	70.4333	110.1	100.767	64.64	40.2333	86.8	Zfp54	Mm.12916	zinc finger protein 54
1456093_at	764.533	55.7	54.8	30.84	11.6	15.6667	Zfp536	Mm.72619	zinc finger protein 536
1436731_at	514.767	63.7667	40.0333	93.16	7.4	25	Zfp533	Mm.126649	zinc finger protein 533
1438327_at	49.9333	29.2333	40.5667	24.94	37.1333	24.1	Zfp533	Mm.126649	Zinc finger protein 533
1457704_at	46.6	20.3667	46.8333	26.36	44.0667	32.7333	Zfp533	Mm.126649	zinc finger protein 533
1435669_at	745	603.367	590	1000.44	708.967	755.133	Zfp532	Mm.286232	zinc finger protein 532
1441243_at	95.7667	33.7667	28.8667	25.66	28.2333	42.7667	Zfp532	Mm.286232	Zinc finger protein 532
1444851_at	114.3	67.4333	57.9	27.92	57.1333	43.3	Zfp532	Mm.286232	Zinc finger protein 532
1456705_at	159.867	92.5667	83.3333	36.82	82.0667	90.8667	Zfp532	Mm.286232	Zinc finger protein 532
1458530_at	59.5667	71.3	45	51.42	52.2333	41.1667	Zfp532	Mm.286232	Zinc finger protein 532
1444425_at	64.2667	25	27.7333	14.52	45.7333	18.8667	Zfp53	Mm.42140	Zinc finger protein 53
1445201_at	52.3	4.96667	27.0333	4.8	18.4333	26.0333	Zfp53	Mm.42140	zinc finger protein 53
1449414_at	167.7	272.767	178	87.74	223.967	224.5	Zfp53	Mm.42140	zinc finger protein 53
1439584_at	6.36667	6.33333	6.86667	6.04	9.4	4.63333	Zfp526	Mm.129371	zinc finger protein 526
1443585_at	8.73333	24.7	20.4	23.88	21.1667	21.0333	Zfp526	Mm.129371	zinc finger protein 526
1448915_at	170.333	303.6	183.967	168.92	244.433	169.133	Zfp524	Mm.19974	zinc finger protein 524
1434085_at	526.7	309.467	380.533	351.68	433.567	280.6	Zfp523	Mm.267359	zinc finger protein 523
1442446_at	86.8333	29.9333	38.6667	38.16	35.2333	40.9667	Zfp523	Mm.267359	Zinc finger protein 523
1439909_at	121.633	139.667	182.433	783.48	187.833	352.033	Zfp521	Mm.40325	zinc finger protein 521
1442709_at	29.3	23.2	29.0333	22	7.93333	9.56667	Zfp521	Mm.40325	Zinc finger protein 521
1451332_at	650.067	559.433	673.8	3304.9	874.033	1606.87	Zfp521	Mm.40325	zinc finger protein 521
1457206_at	38.3	43.2	44.8	51.44	33.4333	69.3667	Zfp521	Mm.40325	Zinc finger protein 521
1459168_at	42.2667	50.5	71.6333	49.02	83.3667	51.2667	Zfp521	Mm.40325	Zinc finger protein 521
1426471_at	343.067	1494.1	1545.43	713.86	435.067	1314.67	Zfp52	Mm.296100	zinc finger protein 52
1426472_at	42.4	249.967	156.7	78.16	60.4	102.633	Zfp52	Mm.296100	zinc finger protein 52
1459383_at	44.3	13.7	40.7	50.2	42.6667	19.1333	Zfp52	Mm.296100	Zinc finger protein 52
1428629_at	258.067	296.3	341.433	108.78	294.467	184.8	Zfp518	Mm.313523	zinc finger protein 518
1437921_x_at	309.467	244.167	327.8	358.62	329.7	343.867	Zfp516	Mm.326526	zinc finger protein 516
1455944_at	93.1667	90.5667	139.1	160.64	129.7	159.033	Zfp516	Mm.326526	zinc finger protein 516
1437483_at	378.5	445.9	419.3	631.5	718	536.633	Zfp513	Mm.45033	zinc finger protein 513
1452689_at	1563.5	1321.93	1068.13	1063.88	975.3	683.633	Zfp512	Mm.259127	zinc finger protein 512
1429610_a_at	171.867	370.033	256.533	294.22	343.033	221.867	Zfp511	Mm.200818	zinc finger protein 511
1434858_x_at	111.933	185.533	141.567	90.7	150.4	138.4	Zfp511	Mm.200818	zinc finger protein 511
1460572_a_at	276.233	465.467	469.733	356.86	485.367	403.167	Zfp511	Mm.200818	zinc finger protein 511
1424706_at	128.067	183.333	160.1	144.42	122.333	136.167	Zfp51	Mm.293030	zinc finger protein 51
1428627_at	60.9	26.8667	20.4667	51.6	166.9	41.2	Zfp509	Mm.258741	zinc finger protein 509
1440136_at	73.1333	69.0333	49.9667	42.8	71.7667	29.1667	Zfp509	Mm.258741	Zinc finger protein 509
1444950_at	14.1667	8.53333	15.2	22.84	32.7	7.9	Zfp509	Mm.258741	zinc finger protein 509
1426262_at	165.7	220.467	224.967	178.68	358.633	171.2	Zfp508	Mm.26594	zinc finger protein 508
1446463_at	67.1	63.8333	89.2	58.8	79.9333	262.833	Zfp508	Mm.26594	Zinc finger protein 508
1452002_at	207.467	183.9	261.867	92.9	329.467	145.433	Zfp508	Mm.26594	zinc finger protein 508
1435002_at	729.733	812.2	921.867	590.24	1256.47	691.567	zfp507	Mm.286296	zinc finger protein 507
1445879_at	4.93333	11.9667	17.1333	3.06	4.66667	10.8	zfp507	Mm.286296	zinc finger protein 507
1423835_at	336.033	1079.67	1673.73	800.42	3721.97	3415.87	Zfp503	Mm.292401	zinc finger protein 503
1423836_at	68.0333	167.9	296.4	356.94	1226.2	854.867	Zfp503	Mm.292401	zinc finger protein 503
1451059_at	34	23.8333	23.1667	11.12	28.3	34.6	Zfp474	Mm.251599	zinc finger protein 474
1457078_at	47.8667	60.9	112.6	70.86	158.6	115.767	Zfp473	Mm.382935	zinc finger protein 473
1425058_at	172.767	287.533	277.433	168	390.233	282.867	Zfp472	Mm.328953	zinc finger protein 472
1427267_at	165.867	110.9	330.3	74.9	95.9	121.5	Zfp469	Mm.354649	zinc finger protein 469
1419564_at	252.733	93.3667	96.1	191.38	509.167	123.167	Zfp467	Mm.2464	zinc finger protein 467
1441727_s_at	486.467	249	128.8	405.56	1028.4	216.2	Zfp467	Mm.2464	zinc finger protein 467
1449510_at	184.1	81.4333	68.2333	176.08	324	120.133	Zfp467	Mm.2464	zinc finger protein 467
1439106_at	801.333	238.467	305.833	124.1	330.6	239.767	Zfp462	Mm.102904	zinc finger protein 462
1456789_at	1216.87	277.967	216.8	106.5	278.667	242.9	Zfp462	Mm.102904	zinc finger protein 462
1458026_at	48.2333	5.23333	4.83333	5.94	7.96667	14.9333	Zfp462	Mm.102904	zinc finger protein 462
1421169_at	24.3	11.9667	31.0667	32.88	36.7333	69.1333	Zfp46	Mm.1504	zinc finger protein 46
1425231_a_at	1657.73	2499.27	3993.73	2495.98	4025.17	8875	Zfp46	Mm.1504	zinc finger protein 46
1445824_at	546.967	383	248.1	50.08	73.8333	163.833	Zfp458	Mm.306358	zinc finger protein 458
1457129_at	15.3333	30.9	32.2	17.82	27.3	29.2333	Zfp458	Mm.306358	Zinc finger protein 458
1427217_at	39.6333	37.7667	29.2	13.64	48.5333	27.7667	Zfp455	Mm.82396	zinc finger protein 455
1456507_at	147.333	131.833	119.833	110.8	106.533	73.4667	Zfp454	Mm.74335	zinc finger protein 454
1427208_at	704.667	1148.07	1339.1	592.72	843.9	719.5	Zfp451	Mm.289103	zinc finger protein 451
1451816_at	27.7333	26.6667	37.6	35.46	25.1	22.1333	Zfp451	Mm.289103	zinc finger protein 451
1455943_at	641.933	198.967	201.567	216.14	245.633	246.433	Zfp451	Mm.289103	zinc finger protein 451
1456350_at	371.867	193.8	113.133	173.68	120.2	175	Zfp451	Mm.289103	zinc finger protein 451
1456415_at	527.233	327.333	283.067	212.32	310.767	274.933	Zfp451	Mm.289103	zinc finger protein 451
1439945_at	145.967	192.367	138.233	104.78	136.967	110.333	Zfp449	Mm.207345	zinc finger protein 449
1439025_at	210.567	152.167	169.3	203.24	135.933	100.033	Zfp446	Mm.62083	zinc finger protein 446
1427254_at	1533.73	1176.43	1388.37	719.28	784.3	655.1	Zfp445	Mm.326477	zinc finger protein 445
1427255_s_at	177.1	126.067	165.767	103.8	123.133	159.8	Zfp445	Mm.326477	zinc finger protein 445
1454774_at	4882.6	3592.97	2993.8	2302.14	3902.5	3585.87	Zfp445	Mm.326477	zinc finger protein 445
1430851_at	317.5	209.667	250.167	215.3	208.333	361.967	Zfp444	Mm.274089	zinc finger protein 444
1452376_at	102.433	85.9	13.3667	77.6	91.1333	7.86667	Zfp444	Mm.274089	zinc finger protein 444
1456154_at	33.6667	36.6	45.1667	48.8	33.2	32.1667	Zfp444	Mm.274089	Zinc finger protein 444
1457059_at	608.433	511.8	540.067	239.24	281.367	511.167	Zfp438	Mm.118257	zinc finger protein 438
1424490_at	178.4	41.7	48.9	145.14	51.9667	36.4667	Zfp428	Mm.181332	zinc finger protein 428
1451997_at	407.867	431.9	391.733	287.38	355.1	312.267	Zfp426	Mm.297660	zinc finger protein 426
1419380_at	128.4	684.933	1303.8	1070.3	87.2333	198.933	Zfp423	Mm.23452	zinc finger protein 423
1429560_at	488.033	389.8	378.367	207.02	167.967	251.733	Zfp422-rs1	Mm.276296	zinc finger protein 422, related sequence 1
1434896_at	1407.4	1176.63	1136.3	654.28	776.967	316.5	Zfp422-rs1	Mm.276296	zinc finger protein 422, related sequence 1
1441348_at	300.167	127	139.567	108.18	90.9667	157	Zfp422-rs1	Mm.276296	Zinc finger protein 422, related sequence 1
1453198_at	403.833	309.933	353.3	276.9	281.667	378.367	Zfp422-rs1	Mm.276296	zinc finger protein 422, related sequence 1
1451244_a_at	1179.2	2772.47	1800.13	2697.62	884.767	959	Zfp422	Mm.18810	zinc finger protein 422
1437212_at	273.733	169.367	83.4667	43.84	115.367	63.8333	Zfp420	Mm.297657	zinc finger protein 420
1418362_at	8.8	7.16667	13.8333	9.04	27.7667	4.13333	Zfp42	Mm.285848	zinc finger protein 42
1424974_at	44.0667	66.6	66.2667	30.56	78.8667	50.2667	Zfp418	Mm.184857	zinc finger protein 418
1436081_a_at	828.733	447.667	632.9	673.68	599.333	406.533	Zfp414	Mm.181488	zinc finger protein 414
1444631_at	6.1	13.0333	25.0667	6.74	16.3	21.5667	Zfp410	Mm.255150	Zinc finger protein 410
1451150_at	383.333	372.2	223.267	437.24	473.367	360.4	Zfp410	Mm.255150	zinc finger protein 410
1451151_s_at	1402.2	1605.93	1382.93	1480.58	1980.6	1260.13	Zfp410	Mm.255150	zinc finger protein 410
1454927_at	468.8	219.233	296.167	234.06	280.2	178.233	Zfp41	Mm.87210	zinc finger protein 41
1457002_at	269.233	250.067	289.733	518.88	486.567	235	Zfp408	Mm.330401	zinc finger protein 408
1439228_at	11.8	17.3333	32.5	21.44	20	29.6	Zfp407	Mm.329575	zinc finger protein 407
1446098_at	50.4333	49.6	77.4667	38.9	49.5667	141.667	Zfp407	Mm.329575	Zinc finger protein 407
1457908_at	34	37.6333	31.8667	22.1	44.7333	132.333	Zfp407	Mm.329575	Zinc finger protein 407
1458094_at	44.7	31.0667	41.8	31.68	43.8333	112.467	Zfp407	Mm.329575	Zinc finger protein 407
1459998_at	497.4	860.533	1218.07	657.88	675.933	874.6	Zfp407	Mm.329575	zinc finger protein 407
1421251_at	82.0667	64.0333	70.3	44.12	45.7667	35.4667	Zfp40	Mm.21025	zinc finger protein 40
1430626_at	45.4667	39.0667	53.3667	25.2	31.5333	29.0667	Zfp398	Mm.169059	zinc finger protein 398
1439979_at	210.233	180.667	146.733	125.98	142.667	111.267	Zfp398	Mm.395440	zinc finger protein 398
1443105_at	17.3	14.6333	9.36667	15.74	9.46667	17.5667	Zfp398	Mm.169059	Zinc finger protein 398
1447959_at	43.4	64.0667	31.5333	30.44	52.9	40.1667	Zfp398	Mm.395440	zinc finger protein 398
1456639_at	188.8	175.933	233.2	62.22	88.2333	113.2	Zfp398	Mm.169059	zinc finger protein 398
1457688_at	68.1667	42.4	89.5333	34.3	82.4	50.5	Zfp398	Mm.169059	zinc finger protein 398
1458003_at	115.833	43.9	51.2333	20.46	29.7	52.0667	Zfp398	Mm.169059	zinc finger protein 398
1425361_at	177.133	112.967	114.4	115.08	95.6	87.7333	Zfp397	Mm.218343	zinc finger protein 397
1435664_at	228.267	192.1	193.867	104.3	111.633	99.5667	Zfp397	Mm.218343	zinc finger protein 397
1443956_at	48.1333	32.4	45.3667	29.4	38.9	57.2	Zfp397	Mm.218343	zinc finger protein 397
1441324_at	89.8333	22.7	3.43333	15.82	24.3667	14.7667	Zfp395	Mm.270087	Zinc finger protein 395
1427590_at	60.1	73.4333	58	28.92	50.3333	27.5333	Zfp39	Mm.127646	zinc finger protein 39
1441198_at	103.1	155.6	159.933	59.34	91.1333	70	Zfp39	Mm.127646	zinc finger protein 39
1421139_a_at	239.3	318.433	229.7	254.9	181.633	155.3	Zfp386	Mm.254997	zinc finger protein 386 (Kruppel-like)
1418865_at	209.667	53.6333	67.6	75.82	44.5	63.8	Zfp385	Mm.14099	zinc finger protein 385
1438047_at	1403.47	3231.7	3607.6	2506.12	3475.27	3558.97	Zfp384	Mm.108677	zinc finger protein 384
1453212_at	979.367	596	564.767	305.42	349.933	347.6	Zfp383	Mm.333743	zinc finger protein 383
1459785_at	14.8333	22.4	12.2667	18.58	9.2	14.3	Zfp383	Mm.333743	Zinc finger protein 383
1449543_at	44.2	43.5667	75.5	59.04	60.5333	27.2333	Zfp371	Mm.155595	zinc finger protein 371
1419207_at	1120.7	509.167	469.833	140.04	372.333	443.667	Zfp37	Mm.5011	zinc finger protein 37
1449391_at	159.933	154.1	162.633	87.12	190.667	263.467	Zfp37	Mm.5011	zinc finger protein 37
1437626_at	3659.33	4830.77	6145.2	3113.42	8615.67	5497.37	Zfp36l2	Mm.259321	zinc finger protein 36, C3H type-like 2
1439054_at	64.0667	105.267	147	92.08	199.267	138.267	Zfp36l2	Mm.259321	zinc finger protein 36, C3H type-like 2
1451034_at	99.1333	52.7667	77.2333	63.42	92.8	48	Zfp36l2	Mm.259321	zinc finger protein 36, C3H type-like 2
1422528_a_at	178.667	325.067	576.933	300.5	318.9	263.033	Zfp36l1	Mm.235132	zinc finger protein 36, C3H type-like 1
1450644_at	7839.93	22705.6	23425.2	15736.7	14746.5	14748.2	Zfp36l1	Mm.235132	zinc finger protein 36, C3H type-like 1
1427538_at	9.83333	4.46667	6.63333	8.08	4.43333	5.56667	Zfp369	Mm.151546	zinc finger protein 369
1455681_at	785.5	826.267	667.667	551.78	733.7	583.7	Zfp369	Mm.151546	zinc finger protein 369
1433623_at	942.4	835.933	804.767	570.46	689	603.433	Zfp367	Mm.300065	zinc finger protein 367
1438772_at	23.1667	33.5667	36.1333	19.14	18.8333	20.3	Zfp367	Mm.300065	zinc finger protein 367
1435615_at	329.433	28.9333	13.6667	15.86	28.5	19.1333	Zfp365	Mm.268346	zinc finger protein 365
1423615_at	1181.27	1790.53	1636.4	1971.36	3160.2	2032.73	Zfp364	Mm.386792	zinc finger protein 364
1437009_a_at	2982.63	4295.9	5190.9	2608.22	4948.17	3777.73	Zfp364	Mm.386792	zinc finger protein 364
1452519_a_at	4231.37	20395	21008.5	11303.4	30582.1	13693.8	Zfp36	Mm.389856	zinc finger protein 36
1451011_at	177.6	180.733	182	296.42	168.4	96.9	Zfp358	Mm.299073	zinc finger protein 358
1456151_at	27.3	8.06667	41.9	38.6	21.1667	46.8333	Zfp358	Mm.299073	zinc finger protein 358
1439044_at	620.4	290.233	280.333	266.28	143.033	160.967	Zfp354c	Mm.103674	zinc finger protein 354C
1450321_at	43	25.4333	27.6	33.88	39.9	43.9667	Zfp354c	Mm.103674	zinc finger protein 354C
1421379_at	111.233	136.367	106.967	58.68	83.9333	52.1	Zfp354b	Mm.74670	zinc finger protein 354B
1420390_s_at	195.5	138.3	122.067	233.24	80.4333	100.867	Zfp354a	Mm.4792	zinc finger protein 354A
1425976_x_at	8.6	4.66667	7.76667	3.3	15.5667	4.16667	Zfp353	---	zinc finger protein 353
1425879_at	56.8667	45	37.6	83.66	103.3	88.4667	Zfp352	Mm.214642	zinc finger protein 352
1425880_x_at	30.7667	32.6333	13.7	31.2	23.2333	38.1333	Zfp352	Mm.214642	zinc finger protein 352
1417778_at	315.067	307.133	352.2	162.26	270.4	187.1	Zfp35	Mm.290596	zinc finger protein 35
1445906_at	4.4	19.9333	3.3	6.42	3.96667	9.9	Zfp35	Mm.290596	Zinc finger protein 35
1417088_at	773.9	483.067	368.267	337.18	363.233	417.733	Zfp346	Mm.22795	zinc finger protein 346
1448581_at	80.8	48.6333	55.2	42.64	37.1	87.7	Zfp346	Mm.22795	zinc finger protein 346
1434234_at	138.9	141.433	99.5	107.06	130.767	61.2	Zfp341	Mm.103555	zinc finger protein 341
1453039_at	441.367	485.967	394.433	479.06	501.867	733.167	Zfp335	Mm.330776	zinc finger protein 335
1420110_s_at	416.7	241.333	140.833	193.58	225.5	159.433	Zfp334	Mm.26316	zinc finger protein 334
1420111_at	5.33333	8.56667	5.8	3.24	6.8	5.26667	Zfp334	Mm.26316	Zinc finger protein 334
1451216_at	1846.2	2529.13	2788.7	2809.72	2144.23	1868.9	Zfp330	Mm.269248	zinc finger protein 330
1422094_a_at	887.567	759.533	638.167	251.84	241.533	275.3	Zfp329	Mm.333574	zinc finger protein 329
1431830_at	686.367	452.067	331.933	147.04	166.3	125.267	Zfp329	Mm.333574	zinc finger protein 329
1419181_at	1570.03	1361.9	2291.43	1706.06	1126.43	2708.43	Zfp326	Mm.248876	zinc finger protein 326
1437959_at	65.1	107.867	104.767	80.46	75.4333	48.3667	Zfp324	Mm.133086	zinc finger protein 324
1452374_at	453.4	762.333	766.167	387.12	417.133	299.933	Zfp322a	Mm.286454	zinc finger protein 322a
1422022_at	12.8	8.66667	18.5	5.62	27.9333	15.2333	Zfp319	Mm.350514	zinc finger protein 319
1436284_s_at	95.0667	187.233	127.767	189.38	281.6	155.167	Zfp319	Mm.436577	zinc finger protein 319
1439008_at	221	489.6	191.367	415.5	682.033	411.6	Zfp319	Mm.350514	zinc finger protein 319
1455638_at	394.433	757.267	436.633	572.28	690.7	440.667	Zfp319	Mm.436577	zinc finger protein 319
1421478_a_at	182.667	99.6333	89.7333	66.54	56.3	64.5	Zfp318	Mm.4950	zinc finger protein 318
1421479_at	240.133	101.4	162.067	72.3	92.2667	74.9667	Zfp318	Mm.4950	zinc finger protein 318
1425346_at	692.1	604.667	849.8	662.42	714.9	464.267	Zfp318	Mm.4950	zinc finger protein 318
1425347_a_at	57.2667	38.8667	84.7667	62.48	46.7333	33.1333	Zfp318	Mm.4950	zinc finger protein 318
1430558_at	812.167	632.033	764.967	530.72	815.767	644.2	Zfp318	Mm.4950	zinc finger protein 318
1450151_at	65.7333	39.6667	31.3	37.32	33.7333	21.8667	Zfp316	---	zinc finger protein 316
1450152_at	7.56667	5.63333	11.9667	7.44	7.03333	16.1	Zfp316	---	zinc finger protein 316
1422959_s_at	193.033	158.733	150.9	172.14	231.6	159.733	Zfp313	Mm.22225	zinc finger protein 313
1427874_at	970.733	1009.43	732.833	926.78	1235.93	932.833	Zfp313	Mm.22225	zinc finger protein 313
1437949_x_at	91.1	50.7333	42.0333	33.42	12.2333	35.9	Zfp313	Mm.22225	zinc finger protein 313
1438257_at	137.667	149.5	122.5	98.36	278.167	240.733	Zfp313	Mm.22225	Zinc finger protein 313
1445585_at	6.46667	2.96667	5.73333	9.36	8.4	6.33333	Zfp313	Mm.22225	zinc finger protein 313
1455975_x_at	2582.47	3199.73	3161.27	1889.84	3466.83	4003.03	Zfp313	Mm.22225	zinc finger protein 313
1446313_at	100.2	39.7667	55.3	75.44	28.8333	37.4333	Zfp30	Mm.292690	zinc finger protein 30
1449813_at	234.367	205.033	214.633	200.78	108.133	155.133	Zfp30	Mm.292690	zinc finger protein 30
1439563_at	164.667	135.5	93.5	208.92	169.333	57.3667	Zfp3	Mm.40966	zinc finger protein 3
1449231_at	51.3667	74.6333	115.067	38.82	33.7	83	Zfp296	Mm.23310	zinc finger protein 296
1425305_at	504.167	1355.67	3633.03	816.5	1079.73	1884.2	Zfp295	Mm.1465	zinc finger protein 295
1441973_at	118.833	151.433	239.8	93.56	86.1333	188.567	Zfp295	Mm.1465	zinc finger protein 295
1446243_at	6.73333	17.6667	37.2667	24.9	31.2333	21.8333	Zfp295	Mm.1465	Zinc finger protein 295
1457552_at	453.933	941.667	1436.1	555.36	608.1	1425.17	Zfp295	Mm.1465	zinc finger protein 295
1427949_at	924.567	831.833	668.433	661.4	642.7	623.033	Zfp294	Mm.249005	zinc finger protein 294
1427950_at	76.9333	41.5667	75.3667	87.32	75.9	63.6667	Zfp294	Mm.249005	zinc finger protein 294
1429886_at	24.5	20.9	3.76667	19	11.8667	7.8	Zfp294	Mm.249005	zinc finger protein 294
1447523_at	127.5	68.1	97.9	55.14	83.6	95	Zfp294	Mm.249005	Zinc finger protein 294
1452611_at	258.233	110	93.1	144.98	198.9	146.4	Zfp294	Mm.249005	zinc finger protein 294
1452612_at	380.733	725.033	625.533	686.52	1065.5	808.667	Zfp294	Mm.249005	zinc finger protein 294
1459594_at	9	6.5	23.5	4.72	14.2667	15.0333	Zfp294	Mm.249005	zinc finger protein 294
1419574_at	496.033	358.333	385.1	206.02	346.267	335.233	Zfp292	Mm.38193	zinc finger protein 292
1419575_s_at	623.267	668.667	759.233	396.52	530.7	572.333	Zfp292	Mm.38193	zinc finger protein 292
1430216_at	74.5667	87.0333	145.2	74.24	40.3	110.233	Zfp292	Mm.38193	zinc finger protein 292
1430961_at	67.0667	35.1	38.2333	33.44	25.0333	19.5333	Zfp292	Mm.38193	zinc finger protein 292
1436308_at	677.4	1300.03	1214.63	824.7	807.867	488.233	Zfp292	Mm.38193	zinc finger protein 292
1443659_at	0.866667	5.96667	1.03333	3.88	5.53333	6.43333	Zfp292	Mm.38193	Zinc finger protein 292
1449515_at	770.533	943.3	1388.7	641.88	508	935.2	Zfp292	Mm.38193	zinc finger protein 292
1457842_at	365.633	270.733	188.633	105.78	119.467	250.233	Zfp292	Mm.38193	Zinc finger protein 292
1458301_x_at	1.76667	7.6	9	2.38	3.06667	14.0667	Zfp292	Mm.38193	Zinc finger protein 292
1435930_at	1140.7	718.767	932.533	380.2	517.333	453.6	Zfp291	Mm.86588	zinc finger protein 291
1437657_at	97	107.2	78.9	64.36	63.1	78.5333	Zfp291	Mm.86588	zinc finger protein 291
1446000_at	94.9333	32.6667	38.8333	25.24	40.8667	72.3667	Zfp291	Mm.86588	Zinc finger protein 291
1439460_a_at	4394.77	5210.27	4215.1	3415.06	4329.17	4372.97	Zfp289	Mm.43636	zinc finger protein 289
1447228_at	232.133	285.667	547.3	162.86	262.1	290.633	Zfp289	Mm.386861	Zinc finger protein 289
1447229_x_at	244.367	146.867	407.233	133.96	163.2	182.833	Zfp289	Mm.386861	Zinc finger protein 289
1448672_a_at	1879.5	1619.17	1388.23	1559.46	1472.1	916.233	Zfp289	Mm.43636	zinc finger protein 289
1425816_at	27.3333	29.5667	18.9	32.26	30.2667	40.7667	Zfp287	Mm.339982	zinc finger protein 287
1436220_at	995.667	715.967	849.867	694.32	714.567	454.4	Zfp287	Mm.339982	zinc finger protein 287
1439842_at	110.033	48.6	57.2667	88.5	56.1333	49.4	Zfp287	Mm.339982	Zinc finger protein 287
1444352_at	70.8333	17.3333	41.2	37.94	13.1	24.1333	Zfp287	Mm.339982	zinc finger protein 287
1425080_at	131.233	40.8333	60.4	36.24	9.8	42.8	Zfp286	Mm.168530	zinc finger protein 286
1425081_at	64.9667	41.3333	32.1333	49.64	48.1	31.4	Zfp286	Mm.168530	zinc finger protein 286
1424297_at	176.8	248.167	128.9	354.8	337.1	112.833	Zfp282	Mm.196782	zinc finger protein 282
1424298_at	100.3	113.733	113.667	105.78	145.667	84.6	Zfp282	Mm.196782	zinc finger protein 282
1426377_at	1356	975.2	1618.67	838.42	1319.87	2013.4	Zfp281	Mm.37867	zinc finger protein 281
1452045_at	1109	798.733	1167.2	678.54	1091.17	1422.03	Zfp281	Mm.62521	zinc finger protein 281
1460085_at	493.3	214.4	287.567	116.86	203.567	234.5	Zfp281	Mm.37867	Zinc finger protein 281
1427587_at	23.8333	14.5667	11.8	24.92	36.5	33.8667	Zfp28	Mm.127014	zinc finger protein 28
1431265_at	53.3333	26.6	46.1333	21.64	44.5	26.8667	Zfp28	Mm.127014	zinc finger protein 28
1439503_at	142.067	81.0333	93.1667	60.72	253.5	102.967	Zfp28	Mm.127014	zinc finger protein 28
1439504_s_at	108.433	91.9	81.1667	68.9	212.467	125.233	Zfp28	Mm.127014	zinc finger protein 28
1433953_at	720.467	1258.9	880.967	2307.34	1307.6	903.433	Zfp277	Mm.26852	zinc finger protein 277
1443362_at	169.767	126.733	147.1	94.9	146.267	211.033	Zfp277	Mm.26852	zinc finger protein 277
1418312_at	431.967	341.333	268.9	250.8	457.033	352.533	Zfp276	Mm.379084	zinc finger protein (C2H2 type) 276
1418313_at	298.533	152.5	100.233	135.62	328.4	153.567	Zfp276	Mm.379084	zinc finger protein (C2H2 type) 276
1439698_at	128.867	82.6333	63.1	40.4	83.2333	77.3333	Zfp276	Mm.379084	Zinc finger protein (C2H2 type) 276
1444934_at	357.033	211.433	225.133	137.92	231.8	230.267	Zfp276	Mm.379084	zinc finger protein (C2H2 type) 276
1418397_at	1202.13	975.167	975.7	834.52	1048.33	629.3	Zfp275	Mm.26595	zinc finger protein 275
1455503_at	192	177.7	123.067	84.72	134.667	61.9667	Zfp273 /// Zfp85-rs1	Mm.288396	zinc finger protein 85, related sequence 1 /// zinc finger protein 273
1438346_at	6.6	5.43333	7.3	17.9	10.0667	11.3667	Zfp273	Mm.358842	Zinc finger protein 273
1440835_at	178.467	145.9	89.3333	100	102.567	65.5333	Zfp27	Mm.86747	zinc finger protein 27
1427684_at	27.5667	31.1667	26.6667	16.96	22.2333	26.9667	Zfp264	---	zinc finger protein 264
1447432_s_at	469.867	834.933	902.667	1009.42	1267.7	661.267	Zfp263	Mm.29081	zinc finger protein 263
1453105_at	238.367	190.033	187.9	262.58	380.933	177.4	Zfp263	Mm.29081	zinc finger protein 263
1419164_at	388.3	567.733	501.5	420.88	481.367	305.667	Zfp260	Mm.195092	zinc finger protein 260
1427830_at	3.36667	2.36667	6.26667	8.78	3.7	3.26667	Zfp260	Mm.195092	zinc finger protein 260
1436495_s_at	1367.27	1794.9	1241.9	965.8	1359.63	1017.5	Zfp260	Mm.195092	zinc finger protein 260
1427120_at	1021.47	1327.73	821.467	632.94	730.033	537.1	Zfp26	Mm.107441	zinc finger protein 26
1419281_a_at	788.5	817.4	766.367	688.96	1358.63	648.3	Zfp259	Mm.17519	zinc finger protein 259
1428294_at	208.9	145.033	238	202.76	300.233	322.9	Zfp259	Mm.17519	zinc finger protein 259
1453034_at	754.1	427.967	376.933	236.74	190.833	241.9	Zfp251	Mm.38195	zinc finger protein 251
1436473_at	81.4	54.2333	27.2	22.44	37.1	9.76667	Zfp248	Mm.212572	zinc finger protein 248
1439534_at	11.3667	10.6	29.7667	24.34	17.2333	11	Zfp248	Mm.212572	zinc finger protein 248
1453531_at	78.1333	162.533	173.133	98.88	129.533	71.1667	Zfp248	Mm.212572	zinc finger protein 248
1458267_at	21.6	20	38.5667	24.28	35.4	18.4333	Zfp248	Mm.212572	zinc finger protein 248
1416586_at	806.7	124.767	76.3	96.88	144.7	111.967	Zfp239	Mm.249661	zinc finger protein 239
1417010_at	4418.67	1663.9	1330.4	1951.8	969.833	1625.4	Zfp238	Mm.330700	zinc finger protein 238
1452426_x_at	12.1333	20.2333	8.43333	17.66	22.4667	41.5333	Zfp236	Mm.34438 /// Mm.394439	Zinc finger protein 236 /// CDNA clone IMAGE:4009820
1455153_at	761.767	1058.13	921.5	695.62	903.567	1157.43	Zfp236	Mm.34438	zinc finger protein 236
1455407_at	418.233	537.633	565.867	395.48	343.5	700.267	Zfp236	Mm.34438	zinc finger protein 236
1429988_at	105.7	133.067	146.167	191.56	113.567	47.4667	Zfp235	Mm.295595	zinc finger protein 235
1449329_at	82.5333	182.8	97.1333	43.74	214.633	41.0333	Zfp235	Mm.295595	zinc finger protein 235
1424301_at	324.867	286.6	331.433	322.64	365.467	270.3	Zfp219	Mm.9239	zinc finger protein 219
1437414_at	298.133	321.667	369.833	575.16	1229.83	641.967	Zfp217	Mm.22858	zinc finger protein 217
1433705_at	151.633	211.267	109.8	218.92	251.367	77.3667	Zfp213	Mm.268582	zinc finger protein 213
1438479_at	45.5	38.1333	52.2333	38.14	47.8	40.5	Zfp213	Mm.268582	zinc finger protein 213
1451292_at	622.067	1223.97	1189.5	1464.18	1173.17	981.833	Zfp212	---	Zinc finger protein 212
1423545_a_at	950.667	1494.83	1041.33	1826.84	1523.73	1150.2	Zfp207	Mm.401332	zinc finger protein 207
1423546_at	18.0667	9.46667	30.8667	15.02	30.9	24.8667	Zfp207	Mm.401332	zinc finger protein 207
1434752_at	176.967	86.7	50	69.36	66.5333	221.133	Zfp207	Mm.401332	zinc finger protein 207
1438515_at	75.7667	36.8667	51.3667	36.3	30.9333	92.2667	Zfp207	Mm.401332	zinc finger protein 207
1438714_at	1906.7	954.3	811.8	739.64	908	1956.07	Zfp207	Mm.401332	zinc finger protein 207
1455092_at	1028.93	208.6	184.867	104.84	163.933	354.233	Zfp207	Mm.401332	zinc finger protein 207
1449915_at	217.933	180.367	286.7	161.76	118.967	165.267	Zfp202	Mm.132196	zinc finger protein 202
1449913_at	235.267	142.2	129.933	80.12	63.7	67.4667	Zfp2	Mm.259230	zinc finger protein 2
1452025_a_at	12.7667	2.66667	2.03333	19.68	1.66667	3.43333	Zfp2	Mm.259230	zinc finger protein 2
1430334_at	22.5667	30.8667	46.7667	31.94	24.8667	25.8667	Zfp192	Mm.290601	zinc finger protein 192
1455778_at	1211.63	1542.13	1889.37	623.44	650.1	580.6	Zfp192	Mm.290601	zinc finger protein 192
1457756_at	44.3667	42.1	70.3667	21.76	14.7	25.1667	Zfp192	Mm.290601	zinc finger protein 192
1422810_at	190.667	168.533	265.567	151.62	129.6	248.367	Zfp191	Mm.417427	zinc finger protein 191
1426895_at	2032.33	1354.97	1819.3	998.26	840.833	1236.87	Zfp191	Mm.417427	zinc finger protein 191
1426896_at	569.9	535.133	358.9	378	336.267	368.133	Zfp191	Mm.417427	zinc finger protein 191
1430650_at	391.567	211.867	142.033	144.4	153.133	130.1	Zfp191	Mm.417427	zinc finger protein 191
1430651_s_at	594.767	393.967	339.7	363.82	277.167	242.233	Zfp191	Mm.417427	zinc finger protein 191
1450762_s_at	68.1333	82.5667	91.9333	93.26	38.4	50.8667	Zfp191	Mm.417427	zinc finger protein 191
1425287_at	107.4	147.833	105.867	114.22	372	72.6667	Zfp189	Mm.186994	zinc finger protein 189
1457285_at	1165.7	1794.57	1599.3	525.74	1830.57	1522.17	Zfp187	---	zinc finger protein 187
1420943_at	12.4	12.4333	35.9	11.62	13.7	14.2333	Zfp185	Mm.1161	zinc finger protein 185
1420944_at	79.6	79.3	55.5667	30.72	20.4	114.9	Zfp185	Mm.1161	zinc finger protein 185
1441997_at	58.5	50.4667	52.8667	224.26	9.8	17.1333	Zfp184	Mm.187446	zinc finger protein 184 (Kruppel-like)
1446820_at	102.567	110.7	88.9667	83.4	129.033	100.467	Zfp182	Mm.170163	zinc finger protein 182
1456504_at	123.533	138.867	108.333	52.58	151.167	160.3	Zfp182	Mm.170163	zinc finger protein 182
1459712_at	92.4333	71.1667	53.0333	25.22	48.2	37.4333	Zfp182	Mm.170163	zinc finger protein 182
1418360_at	1371.47	2.93333	7	27.56	5.4	4.86667	Zfp179	Mm.89201	zinc finger protein 179
1456108_x_at	971.933	2.36667	12.8667	17.76	6.8	2.2	Zfp179	Mm.89201	zinc finger protein 179
1460385_a_at	70.9333	31.2333	23.1	20	26.2333	23.1333	Zfp179	Mm.89201	zinc finger protein 179
1430664_at	29.8667	27.6667	45.3333	21.26	33.7333	17.4667	Zfp169	Mm.251375	zinc finger protein 169
1420864_at	64.8	138.467	77.3	83.68	124.233	52.5667	Zfp161	Mm.29434	zinc finger protein 161
1420865_at	696.333	1140.4	1337.53	533.22	666.833	416.2	Zfp161	Mm.29434	zinc finger protein 161
1420866_at	153.133	190.733	186.333	172.16	192.567	89.9333	Zfp161	Mm.29434	zinc finger protein 161
1437585_x_at	761.2	1849.67	1430.23	1147.58	1160.7	431.167	Zfp161	Mm.29434	zinc finger protein 161
1452126_at	436.3	418.5	289.1	128.28	307.367	183	Zfp160	---	zinc finger protein 160
1418381_at	549.767	905.333	1097.87	641.06	735.867	862	Zfp148	Mm.392667	zinc finger protein 148
1427730_a_at	206.267	380.7	310.967	359.3	331.933	271.533	Zfp148	Mm.392667	zinc finger protein 148
1436217_at	370.9	544	486.4	384.32	426.833	426.233	Zfp148	Mm.391907	zinc finger protein 148
1441612_at	52.3667	27.7333	35.8333	24.48	45.1333	102.1	Zfp148	Mm.392667	Zinc finger protein 148
1441701_at	73.3	21.2333	33.6333	9.24	16.0667	26.3	Zfp148	Mm.392667	Zinc finger protein 148
1449068_at	1644.53	2532.67	1907.67	1990.1	1937	1650.83	Zfp148	Mm.392667	zinc finger protein 148
1449069_at	1181.37	2822.37	1855.17	2427.88	3251.47	2299.3	Zfp148	Mm.392667	zinc finger protein 148
1455483_at	454.533	574.733	676.933	598.24	559.533	553.067	Zfp148	Mm.391907	zinc finger protein 148
1422599_s_at	293.2	783.367	589.267	296.12	494.833	423.867	Zfp143	Mm.10815	zinc finger protein 143
1450681_at	88.1	198.533	145.567	93.16	189.3	104.4	Zfp143	Mm.10815	zinc finger protein 143
1425356_at	118.067	115.7	74.6667	118.26	179.433	122.333	Zfp142	Mm.207298	zinc finger protein 142
1441767_at	75	66.6667	79.6	60.06	154.967	83.1667	Zfp142	Mm.207298	zinc finger protein 142
1445649_x_at	26.7667	68.7	27.6	23.96	47.7	43.2	Zfp142	Mm.207298	zinc finger protein 142
1451682_at	29.2667	32.6333	43.1	36.6	39.2	41.1	Zfp142	Mm.207298	zinc finger protein 142
1454007_a_at	16.6333	15.4	9.83333	26.3	27.2667	7.56667	Zfp142	Mm.207298	zinc finger protein 142
1458187_at	56.2333	82.6667	65.9	57.38	120.7	79.3667	Zfp142	Mm.207298	zinc finger protein 142
1459048_s_at	355.3	402.533	444.733	198.24	399.667	323.5	Zfp142	Mm.207298	zinc finger protein 142
1441619_at	204.167	133.8	66.5333	34.84	72.5333	81.7	Zfp14	Mm.347644	zinc finger protein 14
1456770_at	258.4	106.667	129.367	21.06	86.6	85.4333	Zfp14	Mm.347644	zinc finger protein 14
1427796_at	16.6	8.46667	15.2333	7.98	4.13333	7.06667	Zfp133	---	zinc finger protein 133
1460421_at	88.4333	99.4667	113.467	86.94	148.1	134.367	Zfp133	---	zinc finger protein 133
1428616_at	1797.53	2010.4	2642.77	1832.14	1596.5	3265.03	Zfp131	Mm.139115	zinc finger protein 131
1435131_at	155.9	93.6667	57.2333	150.9	143.2	48.4667	Zfp13	Mm.40326	zinc finger protein 13
1439875_at	141.033	131.367	147.367	102.58	174.567	99.4667	Zfp128	Mm.293823	zinc finger protein 128
1458515_at	79.9333	45.3333	63.0667	23.1	12.7	29.9	Zfp128	Mm.293823	zinc finger protein 128
1421519_a_at	156.833	222.433	182.833	116.18	175.9	99.8667	Zfp120	Mm.254018	zinc finger protein 120
1457433_x_at	76.2333	164.633	259.833	148.64	222.933	110.6	Zfp120	Mm.254018	Zinc finger protein 120
1437023_at	353.4	414.267	377.767	329.66	509.733	216.833	Zfp12	Mm.55211	zinc finger protein 12
1425010_at	47.0667	127	88.6667	37.8	76.5333	44.3667	Zfp119	Mm.294853	zinc finger protein 119
1420675_at	99.3667	108.533	86.8667	25.86	109.233	33.4667	Zfp113	---	zinc finger protein 113
1421458_at	232.733	55.2	102.367	84.54	56.5	111	Zfp112	Mm.82678	zinc finger protein 112
1421130_at	36.0333	22.2667	50.7667	13.2	41.8	21.6667	Zfp111	Mm.333655	zinc finger protein 111
1421131_a_at	44.7667	182.033	108.5	89	206.4	87.6667	Zfp111	Mm.333655	zinc finger protein 111
1437236_a_at	1320.77	2082.8	2499.1	805.44	1382.97	2490.6	Zfp110	Mm.292297	zinc finger protein 110
1437237_x_at	1166.97	2049.4	2410.93	859.2	1703.2	2453.47	Zfp110	Mm.292297	zinc finger protein 110
1450998_at	214.5	352.833	266.5	150.04	295.267	306.1	Zfp110	Mm.292297	zinc finger protein 110
1455413_at	218.367	210	138.733	42.84	171.467	77.1	Zfp11	Mm.135067	zinc finger protein 11
1421711_at	65	72.4	81.8667	71.26	92	64.4667	Zfp109	Mm.103751	zinc finger protein 109
1421454_at	15.2333	3.73333	4.6	20.54	24.5667	6.03333	Zfp108	---	zinc finger protein 108
1425097_a_at	105.767	57.4667	100.1	86.16	63.0333	105.367	Zfp106	Mm.195877	zinc finger protein 106
1425098_at	38.4	84.3	60.1667	22.54	38.8333	89	Zfp106	Mm.195877	zinc finger protein 106
1425331_at	201.267	237.767	268	205.74	158.967	172.7	Zfp106	Mm.195877	zinc finger protein 106
1425332_at	2749.17	2401.77	2395.4	1670.76	1830.93	2144.17	Zfp106	Mm.195877	zinc finger protein 106
1450190_at	19.6667	7.33333	30.6667	22.96	12.8333	9.33333	Zfp106	Mm.195877	zinc finger protein 106
1460252_s_at	270.833	716.567	666.1	291.38	236.533	212.467	Zfp105	Mm.290595	zinc finger protein 105
1425831_at	72.3	48.9	22.5667	51.86	62.6	47.2667	Zfp101	Mm.4417	zinc finger protein 101
1450090_at	362	249.067	163.333	111.9	139.1	233.267	Zfp101	Mm.4417	zinc finger protein 101
1427702_at	455.533	276.533	439.567	416.08	489.067	501.8	Zfp1	Mm.4184	zinc finger protein 1
1417791_a_at	1447.8	1660.57	1425.63	894.38	1580.27	1305.57	Zfml	Mm.132392	zinc finger, matrin-like
1417792_at	364.8	312.9	422.367	194.38	237.9	442.433	Zfml	Mm.132392	zinc finger, matrin-like
1447983_at	6.23333	13.5	18.6	12.88	17.7667	22.5667	Zfml	Mm.132392	Zinc finger, matrin-like
1458523_at	57.8	68.7667	30.6667	34.7	43.4	51.3333	Zfml	Mm.132392	zinc finger, matrin-like
1421433_at	86.2667	2.63333	12.4	14.72	11.7667	28.9667	Zfhx4	Mm.41522	zinc finger homeodomain 4
1437556_at	494.167	14.5667	3.7	23.9	16.9333	51.1	Zfhx4	Mm.41522	zinc finger homeodomain 4
1446215_at	124.4	29.2333	48.8333	30.22	46.8	36.8667	Zfhx2as	---	zinc finger homeobox 2, antisense
1441676_at	139.333	121.533	109.9	177.36	152.267	138.333	Zfat1	Mm.309526	ZFAT zinc finger 1
1443774_at	23.5333	8.06667	17.1	35.86	14.7	26	Zfat1	Mm.309526	ZFAT zinc finger 1
1443775_x_at	20.7667	5.76667	21.1667	25.46	12.1667	5.3	Zfat1	Mm.309526	ZFAT zinc finger 1
1422031_a_at	458.133	513.833	619.433	655.34	504.4	404.4	Zfand6	Mm.209349	zinc finger, AN1-type domain 6
1422032_a_at	5091.93	9333.5	8632	7471.06	5903.27	5274.57	Zfand6	Mm.209349	zinc finger, AN1-type domain 6
1442236_at	7.8	17.0333	9.06667	13.58	29.0667	17.7333	Zfand6	Mm.209349	zinc finger, AN1-type domain 6
1416083_at	6273.4	6212.5	6470.9	5744.56	8157.97	6885.4	Zfand5	Mm.292405	zinc finger, AN1-type domain 5
1416084_at	620.233	635.4	751.233	796.98	1621.47	1406.6	Zfand5	Mm.292405	zinc finger, AN1-type domain 5
1416085_s_at	9092.87	12382.3	20283.3	10210.8	19299.1	21962.2	Zfand5	Mm.292405	zinc finger, AN1-type domain 5
1429657_at	183.6	357.733	258.433	116.76	129.833	511.967	Zfand5	Mm.292405	zinc finger, AN1-type domain 5
1441106_at	77.4	89.8	106.533	60.7	90.0333	83.2333	Zfand5	Mm.379919	zinc finger, AN1-type domain 5
1453224_at	57	30.1333	48.8333	30.62	15.8	26.4667	Zfand5	Mm.292405	zinc finger, AN1-type domain 5
1453374_at	126	116.667	104.367	117.62	238.267	227.3	Zfand5	---	zinc finger, AN1-type domain 5
1419954_s_at	1145.9	1577.73	1315.37	1656.14	1570.97	1264.67	Zfand3	Mm.220972	zinc finger, AN1-type domain 3
1419955_at	26.7	49.6667	21.6	27.54	49.6667	21.7	Zfand3	Mm.220972	Zinc finger, AN1-type domain 3
1426998_at	839.667	1201	1026.27	1332.9	980.067	963.5	Zfand3	Mm.220972	zinc finger, AN1-type domain 3
1441948_x_at	5671.27	8161.53	11692	5982.16	4809.13	7377.57	Zfand3	Mm.220972	zinc finger, AN1-type domain 3
1447850_x_at	113.8	194.4	148.367	121.54	173.233	116.967	Zfand3	Mm.220972	zinc finger, AN1-type domain 3
1452274_at	354.5	794	828.767	1220.72	655.767	848.8	Zfand3	Mm.220972	zinc finger, AN1-type domain 3
1452275_at	8.46667	26.3	9.33333	27.42	41.2667	39.6667	Zfand3	Mm.220972	zinc finger, AN1-type domain 3
1424521_at	233.067	248.767	266.9	248.42	237.833	203.533	Zfand2b	Mm.32646	zinc finger, AN1 type domain 2B
1451390_s_at	415.567	566.567	621.3	504.02	502.367	489.4	Zfand2b	Mm.32646	zinc finger, AN1 type domain 2B
1415940_at	2214.17	8581.97	10228.7	9647.86	5469	3754.17	Zfand2a	Mm.24521	zinc finger, AN1-type domain 2A
1415941_s_at	1563.1	6791.83	7973.4	6584.32	4033.07	3242.7	Zfand2a	Mm.24521	zinc finger, AN1-type domain 2A
1449702_at	1404.6	6520.33	10477.2	6515.74	3321.2	2994.07	Zfand2a	Mm.24521	zinc finger, AN1-type domain 2A
1449703_at	67.2333	94.4333	139.867	104.16	65.0333	97.4667	Zfand2a	Mm.24521	Zinc finger, AN1-type domain 2A
1418408_at	482.333	334	356.533	357.82	224.367	276.233	Zfand1	Mm.371617	zinc finger, AN1-type domain 1
1422249_s_at	10	36.6333	29.7667	17.38	17.2667	16.5333	Zfa /// Zfx	Mm.390269	zinc finger protein, autosomal /// zinc finger protein X-linked
1428047_s_at	131.433	530.167	631.1	209.6	403.133	492.333	Zfa /// Zfx	Mm.390269	zinc finger protein, autosomal /// zinc finger protein X-linked
1439404_x_at	192.333	356.433	488.633	265.24	372.567	238.9	Zfa /// Zfx	Mm.390269	zinc finger protein, autosomal /// zinc finger protein X-linked
1456771_at	227.367	78.4667	47.0667	41.02	29.5	56.9667	Zer1	Mm.44526	zer-1 homolog (C. elegans)
1422748_at	3091.83	187.533	320.067	240.72	592.4	1426.93	Zeb2	Mm.259595	zinc finger E-box binding homeobox 2
1434298_at	1508.8	128.1	62.1333	167.66	651.2	534.067	Zeb2	Mm.259595	zinc finger E-box binding homeobox 2
1442393_at	51.5333	13.6333	21.8	14.4	32.2	17.7	Zeb2	Mm.259595	Zinc finger E-box binding homeobox 2
1445518_at	296.3	16.2333	42.7	26.34	150.7	202.633	Zeb2	Mm.259595	Zinc finger E-box binding homeobox 2
1454200_at	170.167	16.4	24.9333	12.32	91.3333	78.8	Zeb2	Mm.259595	zinc finger E-box binding homeobox 2
1456389_at	1803.2	192.3	74.1	233.6	643.7	671.833	Zeb2	Mm.259595	zinc finger E-box binding homeobox 2
1458941_at	430.1	67.4667	93.9667	104.06	274.5	381.667	Zeb2	Mm.259595	zinc finger E-box binding homeobox 2
1418926_at	4070.17	7858.47	6019.63	6779.74	6292.5	6932.6	Zeb1	Mm.3929	zinc finger E-box binding homeobox 1
1420243_at	17.2333	7.33333	22.2667	21.48	37.6	23.2333	Zeb1	Mm.3929	zinc finger E-box binding homeobox 1
1443005_at	183	451.367	452.067	479.2	371.333	414.333	Zeb1	Mm.3929	zinc finger E-box binding homeobox 1
1443203_at	35	28.1	26.5667	11.38	55.2	74.5333	Zeb1	Mm.3929	Zinc finger E-box binding homeobox 1
1446127_at	365.533	233.067	235.133	205.66	370.333	490.267	Zeb1	Mm.3929	Zinc finger E-box binding homeobox 1
1456686_at	278.667	196.867	138	131.12	180.733	445.333	Zeb1	Mm.3929	Zinc finger E-box binding homeobox 1
1454787_at	1500.63	561.5	1046.97	514.6	162.033	399.367	Zdhhc9	Mm.207367	zinc finger, DHHC domain containing 9
1458142_at	177.3	81.1667	89.6667	47.42	35.5333	31.4	Zdhhc9	Mm.207367	zinc finger, DHHC domain containing 9
1436468_at	101.8	45.6333	26.3	36.04	100.067	74.6	Zdhhc8	Mm.326263	zinc finger, DHHC domain containing 8
1451476_at	499.033	575.933	579.067	779.78	897.333	473.6	Zdhhc8	Mm.326263	zinc finger, DHHC domain containing 8
1416545_at	862.1	1829.9	1139.33	1898.62	2698.67	1003.03	Zdhhc7	Mm.240076	zinc finger, DHHC domain containing 7
1449786_at	27.7333	44.2667	26.4333	36.34	22.9333	27.1333	Zdhhc7	Mm.240076	zinc finger, DHHC domain containing 7
1423300_at	318.5	335.233	188.9	359.68	308.933	292.033	Zdhhc6	Mm.386789	zinc finger, DHHC domain containing 6
1438463_x_at	965.9	868.433	1121.4	1009.5	1203.57	535.933	Zdhhc6	Mm.386789	zinc finger, DHHC domain containing 6
1439057_x_at	1174.8	2183.53	2004.2	2447.54	2167.97	1235.13	Zdhhc6	Mm.386789	zinc finger, DHHC domain containing 6
1441763_at	46.6	35.2333	34.9333	8.68	30.2333	30.6	Zdhhc6	Mm.386789	zinc finger, DHHC domain containing 6
1444231_at	50.0667	24.9667	38.3667	13.78	9.53333	41.3333	Zdhhc6	Mm.386789	Zinc finger, DHHC domain containing 6
1426310_at	126.433	153.5	116.6	174.7	214.2	145.867	Zdhhc5	Mm.288508	zinc finger, DHHC domain containing 5
1426311_s_at	310.333	613.867	528.767	556.14	744.333	575.833	Zdhhc5	Mm.288508	zinc finger, DHHC domain containing 5
1432136_s_at	877.633	1301.17	1269.47	1530.94	1086.33	871.933	Zdhhc4	Mm.261606	zinc finger, DHHC domain containing 4
1423646_at	308.233	354.7	338.433	653.56	491.367	291.2	Zdhhc3	Mm.28300	zinc finger, DHHC domain containing 3
1423647_a_at	168.233	155.333	143.867	275.94	225.533	170.3	Zdhhc3	Mm.28300	zinc finger, DHHC domain containing 3
1438897_at	70.7667	86.7	71.3	93.38	106.1	83.9333	Zdhhc3	Mm.28300	Zinc finger, DHHC domain containing 3
1455368_at	233.3	158	246.2	242.86	167.133	158.1	Zdhhc3	Mm.28300	zinc finger, DHHC domain containing 3
1430611_at	20.2667	14.5667	12.4333	21.1	22.5667	23.6333	Zdhhc25	Mm.45306	zinc finger, DHHC domain containing 25
1428278_at	142.9	163.933	161.967	148.02	155.467	89.3	Zdhhc24	Mm.36885	zinc finger, DHHC domain containing 24
1441069_at	264.3	30.4	20.9	5.64	52.5667	28.8	Zdhhc23	Mm.327852	zinc finger, DHHC domain containing 23
1459723_at	439.933	37.6	35.2	46.26	57.8333	49.6333	Zdhhc22	Mm.185890	zinc finger, DHHC-type containing 22
1429488_at	717.267	746.933	563	714.02	881.9	432	Zdhhc21	Mm.384407	zinc finger, DHHC domain containing 21
1435104_at	301.867	320.633	311.533	386.68	480.667	305.033	Zdhhc21	Mm.32047	zinc finger, DHHC domain containing 21
1431218_at	566.467	622.367	571.9	221.5	175.933	586.767	Zdhhc20	Mm.29044	zinc finger, DHHC domain containing 20
1434236_at	1092.3	291.233	342.7	284.8	241.8	392.967	Zdhhc20	---	zinc finger, DHHC domain containing 20
1451437_at	741	848.567	878.367	1228.52	649.967	978.967	Zdhhc20	---	zinc finger, DHHC domain containing 20
1459724_at	91.4667	15.2667	78.3333	42.64	31.9667	39.3667	Zdhhc20	Mm.29044	zinc finger, DHHC domain containing 20
1452655_at	121.367	10.5	24.9333	15.5	5.56667	46.5667	Zdhhc2	Mm.34326	zinc finger, DHHC domain containing 2
1452656_at	188.233	3.7	3.3	3.9	8.23333	27.5333	Zdhhc2	Mm.34326	zinc finger, DHHC domain containing 2
1453481_at	97.7667	26.8	27.9	37.64	48.5667	75.9333	Zdhhc2	Mm.34326	zinc finger, DHHC domain containing 2
1457204_at	91.4333	50.5333	29.7667	27.48	17.2	48.4	Zdhhc2	Mm.34326	Zinc finger, DHHC domain containing 2
1438607_at	1.73333	16.7333	15.5	10.12	8.2	3.9	Zdhhc19	Mm.76859	zinc finger, DHHC domain containing 19
1433748_at	1077.57	1992.3	2366.93	1583.86	2921.43	3920.13	Zdhhc18	Mm.331948	zinc finger, DHHC domain containing 18
1434397_at	3843.63	1389.3	1172.7	938.86	2046.57	1473.53	Zdhhc17	Mm.339281	zinc finger, DHHC domain containing 17
1447656_at	12.4333	19.2	26.8333	35.12	19.5333	18.9667	Zdhhc17	Mm.339281	zinc finger, DHHC domain containing 17
1455986_at	119.633	43.0333	50.5333	38.16	34.6667	62	Zdhhc17	Mm.339281	zinc finger, DHHC domain containing 17
1458084_at	168.2	125.067	82.6333	79.84	158.233	249.967	Zdhhc17	Mm.339281	Zinc finger, DHHC domain containing 17
1458363_at	42.9333	11.7333	20.0667	22.2	18.8333	14.5333	Zdhhc17	Mm.339281	zinc finger, DHHC domain containing 17
1421115_a_at	669.5	820.133	801.3	1294.3	835.433	659.033	Zdhhc16	Mm.20387	zinc finger, DHHC domain containing 16
1436582_at	100.8	83.9333	32.0333	154.62	46.1667	102.333	Zdhhc15	Mm.30574	zinc finger, DHHC domain containing 15
1442274_at	24.8333	13.2667	10.8333	10.78	17.3333	10.0667	Zdhhc15	Mm.30574	zinc finger, DHHC domain containing 15
1423668_at	1176.4	209.767	190.733	105.64	306.667	275	Zdhhc14	Mm.399660	zinc finger, DHHC domain containing 14
1437614_x_at	6127.27	1152	1347.73	650.44	1667.7	1383.2	Zdhhc14	Mm.399660	zinc finger, DHHC domain containing 14
1437616_x_at	195.967	296.233	361.933	217.54	214.133	215.9	Zdhhc14	Mm.399660	zinc finger, DHHC domain containing 14
1438151_x_at	3381.57	1187.63	2126.8	861	1717.83	2100.63	Zdhhc14	Mm.399660	zinc finger, DHHC domain containing 14
1438619_x_at	7539.1	1491.9	1757.73	764.52	1860.8	1674.63	Zdhhc14	Mm.399660	zinc finger, DHHC domain containing 14
1438975_x_at	6064.93	1183.7	1432.63	632.6	1703.1	1311	Zdhhc14	Mm.399660	zinc finger, DHHC domain containing 14
1428307_at	376.1	197.833	139.8	200.62	170.2	273.067	Zdhhc13	Mm.279116	zinc finger, DHHC domain containing 13
1460048_at	190.567	26.2667	52.2333	18.42	37.9667	52.6667	Zdhhc13	Mm.279116	Zinc finger, DHHC domain containing 13
1448857_a_at	280.6	258.267	454.6	206.58	211.867	208.967	Zdhhc12	Mm.22538	zinc finger, DHHC domain containing 12
1430349_at	39.4	29.7667	29.9667	43.84	16.1333	23.3667	Zdhhc11	Mm.66995	zinc finger, DHHC domain containing 11
1460413_s_at	220.433	169.3	86.3	322.42	289.4	194.9	Zdhhc1	Mm.100917	zinc finger, DHHC domain containing 1
1454097_at	34.7	50.6	23.8	34.88	42.9	28.8333	Zcwpw2	Mm.335517	zinc finger, CW type with PWWP domain 2
1428489_at	3957.27	4913.83	7175.8	3857.98	2859.3	5428.73	Zcrb1	Mm.293181	zinc finger CCHC-type and RNA binding motif 1
1437896_at	167.4	62.9333	67.0667	29.86	36.6	112.2	Zcrb1	Mm.293181	Zinc finger CCHC-type and RNA binding motif 1
1446789_at	25.7333	11	11.7667	18.14	13.0333	16.8333	Zcrb1	Mm.293181	Zinc finger CCHC-type and RNA binding motif 1
1428441_at	1280.1	950.533	1172.53	891.14	454.8	698.033	Zcd2	Mm.269993	zinc finger, CDGSH-type domain 2
1429283_at	56.8	45.9	44.1	48.28	54.4667	30.0667	Zcd2	Mm.269993	zinc finger, CDGSH-type domain 2
1430992_s_at	164.3	97.7667	83.6667	109.38	80.1667	87.1667	Zcd2	Mm.269993	zinc finger, CDGSH-type domain 2
1416849_at	914.067	228.067	176.933	392.28	227.667	159.867	Zcd1	Mm.254114	zinc finger, CDGSH-type domain 1
1416850_s_at	5596.8	2852.33	2291.83	3596.36	1880.7	1511.23	Zcd1	Mm.254114	zinc finger, CDGSH-type domain 1
1424557_at	566.6	695.933	628.367	897.4	647.167	557.467	Zcchc9	Mm.52356	zinc finger, CCHC domain containing 9
1423755_at	1179.13	1573.97	1610.33	1532.36	1787.8	1651.37	Zcchc8	Mm.279427	zinc finger, CCHC domain containing 8
1441639_at	35.7	85.9333	9.76667	25.76	71.4667	38.7667	Zcchc8	Mm.279427	zinc finger, CCHC domain containing 8
1438580_at	311.867	224.467	126.667	62.36	138.133	309.367	Zcchc7	Mm.331576	zinc finger, CCHC domain containing 7
1439033_at	246.467	103.2	99.6333	35.16	39.5333	155.233	Zcchc7	Mm.331576	zinc finger, CCHC domain containing 7
1433910_at	1965.7	5352.07	4939.17	4365.58	7030.7	7931.43	Zcchc6	Mm.233082	zinc finger, CCHC domain containing 6
1441986_at	284.267	1043.33	2053.27	490.02	948.533	927.833	Zcchc6	Mm.233082	zinc finger, CCHC domain containing 6
1448037_at	107.3	626.367	899.333	280.04	988.3	536.967	Zcchc6	Mm.233082	Zinc finger, CCHC domain containing 6
1437355_at	4.66667	7.63333	8.1	9.84	11.2667	8.3	Zcchc5	Mm.85581	zinc finger, CCHC domain containing 5
1429716_at	61.9667	83.1333	95.7333	52.46	94.2667	47.8	Zcchc4	Mm.266886	zinc finger, CCHC domain containing 4
1437831_at	17.3667	20.0667	18.2333	12.56	5.73333	6.56667	Zcchc4	Mm.266886	Zinc finger, CCHC domain containing 4
1428401_at	551	350.067	155	273.46	439.433	491.833	Zcchc3	Mm.391810	zinc finger, CCHC domain containing 3
1428402_at	287.133	116.7	63.2333	81.26	167.667	148.1	Zcchc3	Mm.427626	zinc finger, CCHC domain containing 3
1434401_at	790.633	1012.63	991.433	497.36	1186	970.533	Zcchc2	Mm.210188	zinc finger, CCHC domain containing 2
1437979_at	33.1333	63	118.8	40.5	32.8667	66.0667	Zcchc2	Mm.210188	Zinc finger, CCHC domain containing 2
1425293_a_at	1679.33	40.1333	45.6667	102.1	43.7667	41.0333	Zcchc18	Mm.276518	zinc finger, CCHC domain containing 18
1446066_at	65.6	47.2333	58.7667	36.94	47.1	51.7	Zcchc17	Mm.297196	zinc finger, CCHC domain containing 17
1452084_at	1481.67	1198.67	1170.8	1140	1056.73	763.4	Zcchc17	Mm.297196	zinc finger, CCHC domain containing 17
1418168_at	1357.47	1945.07	1923.7	1479.82	2565.77	3104.13	Zcchc14	Mm.435502	zinc finger, CCHC domain containing 14
1418169_at	165.3	245.5	173.333	306.56	479.767	373.267	Zcchc14	Mm.435502	zinc finger, CCHC domain containing 14
1418170_a_at	409.633	509.967	559.167	580.8	629.433	785.167	Zcchc14	Mm.435502	zinc finger, CCHC domain containing 14
1441017_at	201.133	197.1	163.167	209.58	272.6	383.167	Zcchc14	Mm.435502	zinc finger, CCHC domain containing 14
1428434_at	3130.7	19.9333	18.2	122.68	74.0667	53.2667	Zcchc12	Mm.297698	zinc finger, CCHC domain containing 12
1437395_at	986.4	1736.23	1445.77	2420.52	1709.83	1879.17	Zcchc11	Mm.25181	zinc finger, CCHC domain containing 11
1441359_at	54.6667	38.2333	29.0667	20.52	21.7667	47.9333	Zcchc11	Mm.25181	zinc finger, CCHC domain containing 11
1441545_at	251.3	196.8	171.7	120.1	82.2333	226.833	Zcchc11	Mm.25181	zinc finger, CCHC domain containing 11
1456553_at	226.6	212.233	138.767	120.12	218.4	240.3	Zcchc11	Mm.25181	Zinc finger, CCHC domain containing 11
1456668_at	66.5333	19.7333	44.4	32.46	27.2	63.9	Zcchc11	Mm.25181	Zinc finger, CCHC domain containing 11
1418820_s_at	309.267	597.3	556.533	371.66	359.533	345.433	Zcchc10	Mm.288072	zinc finger, CCHC domain containing 10
1426654_at	391.167	361	284.533	643.82	503	398.3	Zc3hc1	Mm.29780	zinc finger, C3HC type 1
1428378_at	190	400.7	571.933	301	684.467	549.433	Zc3hav1	Mm.25243	zinc finger CCCH type, antiviral 1
1431909_at	70.9333	220.367	238.733	123.92	332.2	179.7	Zc3hav1	Mm.25243	zinc finger CCCH type, antiviral 1
1418495_at	228.133	282.433	303.333	169.68	315.833	162.1	Zc3h8	Mm.11675	zinc finger CCCH type containing 8
1448006_at	14.7667	11.0333	19.8667	6.5	16.3333	18.8	Zc3h7b	Mm.432075	zinc finger CCCH type containing 7B
1455547_at	949.433	1430.63	1610.67	1602.1	925.5	1039.23	Zc3h7b	Mm.432075	zinc finger CCCH type containing 7B
1419898_s_at	201.8	516.7	429.267	504.02	659.567	752.1	Zc3h7a	Mm.226860	zinc finger CCCH type containing 7 A
1419899_at	23.2333	7.7	24.5333	22.52	5.66667	26.7667	Zc3h7a	Mm.226860	Zinc finger CCCH type containing 7 A
1428682_at	260.633	184.067	281.8	135.98	179.1	209	Zc3h6	Mm.26377	zinc finger CCCH type containing 6
1453415_at	48.7667	79.4333	84.8333	109.5	35.9	86.6667	Zc3h6	Mm.404541	zinc finger CCCH type containing 6
1453477_at	22.4	11.9667	47.8333	7.82	22.7333	43.5333	Zc3h6	Mm.26377	zinc finger CCCH type containing 6
1435949_at	64.8333	34.4	88.1667	21.24	77.5667	73.3667	Zc3h3	Mm.209800	zinc finger CCCH type containing 3
1427876_at	1435.67	1343.1	1387.87	1573.88	1114.37	1113.17	Zc3h15	Mm.27804	zinc finger CCCH-type containing 15
1427877_at	2060.67	1646.67	3516.4	1915.06	1293.67	1853.77	Zc3h15	Mm.27804	zinc finger CCCH-type containing 15
1436412_at	163.467	169.133	205.567	90.46	86.1333	125.133	Zc3h15	Mm.27804	Zinc finger CCCH-type containing 15
1446512_at	50.5333	25.5	23.2	18.32	18.8333	76.0333	Zc3h15	Mm.27804	zinc finger CCCH-type containing 15
1453684_s_at	701.133	442.767	841.567	749.02	502.233	582.8	Zc3h15	Mm.27804	zinc finger CCCH-type containing 15
1457832_at	206.833	144.433	155.433	101.68	123.833	116.933	Zc3h15	Mm.27804	Zinc finger CCCH-type containing 15
1459325_at	149.067	140.967	120.8	55.38	20.6	75.2333	Zc3h15	Mm.27804	Zinc finger CCCH-type containing 15
1426999_at	1574.17	2155.33	2214.2	2001.08	1024.5	1866.5	Zc3h14	Mm.25549	zinc finger CCCH type containing 14
1431745_a_at	945.133	1306.17	1094.37	1645.92	1080.53	997.333	Zc3h14	Mm.25549	zinc finger CCCH type containing 14
1430568_at	324.167	339.967	702.167	278.2	284.1	405.667	Zc3h13	Mm.74704	zinc finger CCCH type containing 13
1434894_at	288.367	315.9	317.067	298.12	452.733	299.9	Zc3h13	Mm.74704	zinc finger CCCH type containing 13
1445499_at	736.6	763.7	1033.1	614.5	763.767	656.167	Zc3h13	Mm.74704	zinc finger CCCH type containing 13
1447581_at	60.6	40.3	52.8667	15.3	35.5	65.4	Zc3h13	Mm.74704	Zinc finger CCCH type containing 13
1459488_at	285.3	241.267	172.833	115.04	115.633	272.167	Zc3h13	Mm.74704	Zinc finger CCCH type containing 13
1458504_at	37.4333	41.8	68.7667	36.96	48.4	43.4	Zc3h12d	Mm.140055	zinc finger CCCH type containing 12D
1437111_at	898.9	628.767	623.033	696.66	777.7	1066.5	Zc3h12c	Mm.295686	zinc finger CCCH type containing 12C
1441787_at	69.6	68.3667	62.1667	123.7	69	63.5667	Zc3h12c	Mm.295686	Zinc finger CCCH type containing 12C
1444402_at	502.833	477.267	446.033	780.46	687.467	697.833	Zc3h12c	Mm.390172	zinc finger CCCH type containing 12C
1427348_at	161.4	97.2333	340.8	88.92	731.067	1025.3	Zc3h12a	Mm.402	zinc finger CCCH type containing 12A
1443993_at	51.5333	30.4667	33.1333	36.38	78.6	89.5667	Zc3h12a	Mm.402	zinc finger CCCH type containing 12A
1415764_at	5135	7735.17	10247.7	7359.84	8536.3	10015.4	Zc3h11a	Mm.245357	zinc finger CCCH type containing 11A
1426359_at	2255.97	4100	3292.27	4438.14	5229.33	4728.57	Zc3h11a	Mm.245357	zinc finger CCCH type containing 11A
1426360_at	647.033	833.867	1027.3	864.58	728.833	1373.63	Zc3h11a	Mm.245357	zinc finger CCCH type containing 11A
1426361_at	1247	1881.9	2860.57	2483.9	2018.6	3792.07	Zc3h11a	Mm.245357	zinc finger CCCH type containing 11A
1417833_at	561.3	909.967	1174.03	715.72	1918.1	714.033	Zc3h10	Mm.68289	zinc finger CCCH type containing 10
1429125_at	159.033	295.633	195.333	198.02	329.7	122.1	Zbtb9	Mm.328890	zinc finger and BTB domain containing 9
1426266_s_at	391.233	217.2	290.367	310.1	290.367	240.533	Zbtb8os	Mm.36575	zinc finger and BTB domain containing 8 opposite strand
1426267_at	44.4667	31.2	26.5333	22.76	31.4	23.6333	Zbtb8os	Mm.36575	zinc finger and BTB domain containing 8 opposite strand
1452006_x_at	23.4	28.1333	30.9667	12.4	20.4667	33.7667	Zbtb8os	Mm.36575	zinc finger and BTB domain containing 8 opposite strand
1455193_at	48.9333	17.4	15.2	8.92	36.9	31	Zbtb8	Mm.428660	zinc finger and BTB domain containing 8
1425819_at	59.9667	33.4333	54.0667	47.16	91.9	41.3667	Zbtb7c	Mm.159332	zinc finger and BTB domain containing 7C
1436365_at	104.367	38.4667	10.4333	39.3	15.5667	120.967	Zbtb7c	Mm.159332	zinc finger and BTB domain containing 7C
1420663_at	167.433	151.833	215.667	149.52	172.567	202.667	Zbtb7b	Mm.262184	zinc finger and BTB domain containing 7B
1455071_at	277.167	24.6	114.4	66.78	111.4	65.6	Zbtb7b	Mm.262184	zinc finger and BTB domain containing 7B
1437255_at	53.5	44.0333	46.4333	42.78	47.9333	73.4	Zbtb7a	Mm.20920	Zinc finger and BTB domain containing 7a
1450093_s_at	350.767	241.933	287.833	275.54	183.7	216.533	Zbtb7a	Mm.20920	zinc finger and BTB domain containing 7a
1452932_at	172.267	227.4	232.133	186.86	219.567	235.867	Zbtb7a	Mm.20920	zinc finger and BTB domain containing 7a
1437484_at	254.7	221.333	251.267	268.54	266.267	161.7	Zbtb5	Mm.44222	zinc finger and BTB domain containing 5
1418200_at	361.333	339.2	306.433	246.14	415.1	321.9	Zbtb48	Mm.24661	zinc finger and BTB domain containing 48
1435802_at	255.267	385.667	258	229.26	457.167	101.533	ZBTB45	Mm.279272	zinc finger and BTB domain containing 45
1427271_at	275.467	571.333	625.433	508.78	299.733	501.3	Zbtb44	Mm.239355	zinc finger and BTB domain containing 44
1427272_at	22.4	32.8667	49	37.74	14.5	28.3333	Zbtb44	Mm.239355	zinc finger and BTB domain containing 44
1431127_at	24.7333	36.8667	12.8	30.04	27.1667	19	Zbtb43	Mm.44186	zinc finger and BTB domain containing 43
1435900_at	1358.07	961.867	906.367	854.86	601.733	1197.37	Zbtb43	Mm.44186	zinc finger and BTB domain containing 43
1428779_at	2162.13	1612.37	1519.17	818.96	1466.17	1513.8	Zbtb41	Mm.395209	zinc finger and BTB domain containing 41 homolog
1439089_at	388.1	428.733	477.9	319.34	301.3	358.433	Zbtb41	Mm.395209	zinc finger and BTB domain containing 41 homolog
1429722_at	2120.27	5127.03	5636.7	1396.9	2908.13	6340.87	Zbtb4	Mm.426361	zinc finger and BTB domain containing 4
1457293_at	234.733	464.5	566.467	142.84	420.133	611.767	Zbtb4	Mm.426361	Zinc finger and BTB domain containing 4
1460488_at	96.8	81.8333	166.267	75.9	83.5	97.2667	Zbtb4	Mm.426361	zinc finger and BTB domain containing 4
1443880_at	125.967	349	468.633	232.36	434.633	316.933	Zbtb39	Mm.27258	zinc finger and BTB domain containing 39
1438269_at	47.9	31.6667	73.3	38.8	51.3667	21.8	Zbtb38	Mm.259909	zinc finger and BTB domain containing 38
1440423_at	81.4	66.5667	107.433	48.98	59.8333	103.867	Zbtb37	Mm.296127	zinc finger and BTB domain containing 37
1457810_at	54	33.4333	21.1	24.72	50.3333	39.3	Zbtb37	Mm.296127	zinc finger and BTB domain containing 37
1436085_at	480.6	782.567	418.467	1800.86	826.867	596.8	Zbtb34	Mm.296512	zinc finger and BTB domain containing 34
1447042_at	33.4667	55.1667	90.6333	68.9	44.7333	20	Zbtb34	Mm.296512	zinc finger and BTB domain containing 34
1421094_at	41.3667	70.0667	43.3	27.26	40.7	58	Zbtb33	Mm.391248	zinc finger and BTB domain containing 33
1434022_at	1683.6	1607.87	1110.5	1261.16	1290.1	1327.6	Zbtb33	Mm.391248	zinc finger and BTB domain containing 33
1432459_a_at	20.3333	26.7667	62.8667	42.7	50.8	24	Zbtb32	Mm.116789	zinc finger and BTB domain containing 32
1447330_at	35.0667	81.6667	76.5333	43.52	95.8333	81.3333	Zbtb32	Mm.116789	zinc finger and BTB domain containing 32
1427106_at	66.2333	45.0333	37	37.74	93.8333	70.2667	Zbtb3	Mm.23423	zinc finger and BTB domain containing 3
1440180_x_at	41.7667	42.6	31.1333	14.36	69.4	44.7	Zbtb3	Mm.23423	zinc finger and BTB domain containing 3
1434629_at	176.2	181	64.4667	66.1	124.3	55.5	Zbtb26	Mm.383299	zinc finger and BTB domain containing 26
1447721_at	3.46667	2.86667	2.66667	1.5	12.7	2.06667	Zbtb26	Mm.383299	zinc finger and BTB domain containing 26
1430344_at	34.7333	55.8667	58.9	42.1	52.2	56.6	Zbtb25	Mm.41880	zinc finger and BTB domain containing 25
1453175_at	218.1	172.7	201.5	137.06	236.767	158.067	Zbtb25	Mm.41880	zinc finger and BTB domain containing 25
1438218_at	455.067	819.2	723.867	344.88	823.867	332.1	Zbtb24	Mm.258475	zinc finger and BTB domain containing 24
1442567_at	42.2	57	61.5667	69.7	50.9	27.3667	Zbtb24	Mm.258475	zinc finger and BTB domain containing 24
1446628_at	58.4	60.2667	25.5	31.4	62.2667	65.4667	Zbtb24	---	zinc finger and BTB domain containing 24
1447074_at	15.1	30.5333	17.1	21.34	31	15.0667	Zbtb24	---	zinc finger and BTB domain containing 24
1448705_at	1136.9	2377.13	2020.4	2238.14	1740.57	2211.53	Zbtb22	---	zinc finger and BTB domain containing 22
1422064_a_at	1188.3	1401.7	1429.47	269.5	517.8	1448.1	Zbtb20	Mm.136238	zinc finger and BTB domain containing 20
1437065_at	929.333	770.767	549.533	224.02	327.167	753.7	Zbtb20	Mm.136238	zinc finger and BTB domain containing 20
1437066_at	1542.87	1799.47	1415.17	335.72	366.2	1245.3	Zbtb20	Mm.136238	zinc finger and BTB domain containing 20
1437598_at	2179.1	3478.67	1737.1	602.3	796.333	2474.07	Zbtb20	Mm.136238	zinc finger and BTB domain containing 20
1438443_at	3383.2	3477.47	4094.23	635.36	1123.17	3363.03	Zbtb20	Mm.136238	zinc finger and BTB domain containing 20
1439128_at	1452.97	2104	1465.5	728.14	1005.1	1784.23	Zbtb20	Mm.136238	zinc finger and BTB domain containing 20
1439278_at	801.233	952.467	736.1	232.28	691.967	825.967	Zbtb20	Mm.136238	zinc finger and BTB domain containing 20
1440565_at	133.5	110.833	105.867	40.18	72.2667	314.867	Zbtb20	Mm.136238	Zinc finger and BTB domain containing 20
1443471_at	396.6	507.067	569.5	133.28	296.667	1473.3	Zbtb20	Mm.136238	zinc finger and BTB domain containing 20
1451577_at	402.067	757.6	572.733	167.26	222.867	571.9	Zbtb20	Mm.136238	zinc finger and BTB domain containing 20
1434901_at	716.867	1440.27	2769.57	1608.18	1441.8	1298.07	Zbtb2	Mm.262466	zinc finger and BTB domain containing 2
1457037_at	18.9333	9.4	21.4	13.58	22.5667	16.1667	Zbtb2	Mm.262466	zinc finger and BTB domain containing 2
1416224_at	488.367	437.8	349.933	508.26	477.867	411.333	Zbtb17	Mm.389590	zinc finger and BTB domain containing 17
1443041_at	57.1	71.8333	69.6333	36.42	58.0667	62.5667	Zbtb17	Mm.389590	zinc finger and BTB domain containing 17
1419874_x_at	245.4	617.333	164.2	15.84	19.2333	476	Zbtb16	Mm.425561	zinc finger and BTB domain containing 16
1427638_at	126.867	329.7	83.7667	36.7	66	437.7	Zbtb16	Mm.425561	zinc finger and BTB domain containing 16
1439163_at	660.2	3044.2	696.6	42.4	74.0667	2003.6	Zbtb16	Mm.425561	zinc finger and BTB domain containing 16
1445562_at	77.0333	80.4333	28.5	25.52	41.2333	235.2	Zbtb16	Mm.425561	Zinc finger and BTB domain containing 16
1456986_at	16.5	24.9333	6.96667	5.42	10.5	59.9333	Zbtb16	Mm.425561	Zinc finger and BTB domain containing 16
1459557_at	58	96.6	28.6667	4.14	45.7	349.9	Zbtb16	Mm.425561	Zinc finger and BTB domain containing 16
1436382_at	49.4	39.9333	38.3333	52.58	26.8667	26.5	Zbtb12	Mm.161119	zinc finger and BTB domain containing 12
1454826_at	1581.47	1429.67	2172.73	1593.34	2274.5	3647.4	Zbtb11	Mm.391619	zinc finger and BTB domain containing 11
1458695_at	53.9333	75.8333	53.7	66.06	67.4	31.8333	Zbtb10	Mm.103262	Zinc finger and BTB domain containing 10
1424750_at	308.467	605.667	470	484.98	578.733	288.6	Zbtb1	Mm.77065	zinc finger and BTB domain containing 1
1438110_at	83.0667	64.6	83.6	67.92	51.5667	76.2667	Zbtb1	Mm.436765	Zinc finger and BTB domain containing 1
1419604_at	17.9667	11.5333	13.1	17.12	17.9333	25.9333	Zbp1	Mm.116687	Z-DNA binding protein 1
1429947_a_at	21.5667	40.9667	58.0333	20.26	11.2333	56.3667	Zbp1	Mm.116687	Z-DNA binding protein 1
1427090_at	194.667	205.133	149.333	334.46	208.733	111.667	Zbed4	Mm.422861	zinc finger, BED domain containing 4
1446809_at	28.0667	2.5	5.26667	10.82	17.3	9.63333	Zbed4	Mm.337647	Zinc finger, BED domain containing 4
1437097_at	26.6	10.7333	22.7	21.32	40.1	14.4667	Zbed3	Mm.3774	zinc finger, BED domain containing 3
1437830_x_at	144.2	186.2	227.3	223.18	161.667	128.167	Zbed3	Mm.3774	zinc finger, BED domain containing 3
1452088_at	14.3	27.1667	23.8333	19.26	35.6667	22.7333	Zbed3	Mm.3774	zinc finger, BED domain containing 3
1453848_s_at	422.067	714.8	863.633	1212.12	569.1	446.467	Zbed3	Mm.3774	zinc finger, BED domain containing 3
1458207_at	11.1	18.7333	12.0333	10.02	34.9333	37.4	Zbed3	Mm.3774	Zinc finger, BED domain containing 3
1434494_at	114.867	96.3	123.233	109.76	145.933	88.9667	Zar1	Mm.11934	zygote arrest 1
1422701_at	39.7333	230.2	111.5	359.56	37.3	28.0333	Zap70	Mm.8038	zeta-chain (TCR) associated protein kinase
1439749_at	509.767	338.2	581.767	311.06	390.5	456.833	Zap70	Mm.8038	zeta-chain (TCR) associated protein kinase
1440178_x_at	42.3	392.567	361.667	309.14	51.0667	15.9667	Zap70	Mm.8038	zeta-chain (TCR) associated protein kinase
1421614_at	4.16667	6.86667	5.43333	3.56	4.7	4.5	Zan	Mm.7984	zonadhesin
1451277_at	1809.53	2547.07	2743.5	2626.84	1868	919.4	Zadh2	Mm.147052	zinc binding alcohol dehydrogenase, domain containing 2
1429474_at	116.867	53.7	63.7667	72.98	30.4333	52.2667	Zadh1	Mm.246127	zinc binding alcohol dehydrogenase, domain containing 1
1433503_at	2138.87	1217.93	1310.7	1277.6	1082.33	1217.67	Zadh1	Mm.246127	zinc binding alcohol dehydrogenase, domain containing 1
1443244_at	41.4333	28.3667	5.7	25.78	31.9	33.0333	Zadh1	Mm.246127	zinc binding alcohol dehydrogenase, domain containing 1
1451744_a_at	382.633	234.533	291.367	298.74	243.333	137.867	Zadh1	Mm.246127	zinc binding alcohol dehydrogenase, domain containing 1
1453156_s_at	430.1	182.333	212.2	238.82	165.267	175.167	Zadh1	Mm.246127	zinc binding alcohol dehydrogenase, domain containing 1
1459291_at	48.9667	4	36.4667	19.44	19.9667	18.7333	Zadh1	Mm.246127	zinc binding alcohol dehydrogenase, domain containing 1
1422569_at	4366.27	9496.77	8430.4	9034.2	5533.63	9087.9	Yy1	Mm.3868	YY1 transcription factor
1435824_at	1700.2	2423.77	2880	2475.94	2252.1	2878.23	Yy1	Mm.3868	YY1 transcription factor
1457834_at	102.067	120.9	151.5	159.98	171.367	183.267	Yy1	Mm.3868	YY1 transcription factor
1416102_at	2296.87	2031.4	2102.97	3365.44	2395	1849.73	Ywhaz	Mm.3360	tyrosine 3-monooxygenase/tryptophan 5-monooxygenase activation protein, zeta polypeptide
1416103_at	509.433	622.267	474.6	717.16	762.5	617.333	Ywhaz	Mm.3360	tyrosine 3-monooxygenase/tryptophan 5-monooxygenase activation protein, zeta polypeptide
1436971_x_at	11187.1	13230.2	15876	9537.48	10751.5	12951.4	Ywhaz	Mm.3360	tyrosine 3-monooxygenase/tryptophan 5-monooxygenase activation protein, zeta polypeptide
1436981_a_at	1127.33	2137.3	1415.43	1000.64	2402.2	1957.13	Ywhaz	Mm.3360	tyrosine 3-monooxygenase/tryptophan 5-monooxygenase activation protein, zeta polypeptide
1439005_x_at	452.767	343.7	439.1	354.96	438.667	421.933	Ywhaz	Mm.3360	tyrosine 3-monooxygenase/tryptophan 5-monooxygenase activation protein, zeta polypeptide
1443893_at	61.4667	127.6	119.5	48.48	60.8	407.233	Ywhaz	Mm.3360	Tyrosine 3-monooxygenase/tryptophan 5-monooxygenase activation protein, zeta polypeptide
1447962_at	122.733	171.167	306.033	71.92	147.633	136.833	Ywhaz	Mm.3360	Tyrosine 3-monooxygenase/tryptophan 5-monooxygenase activation protein, zeta polypeptide
1448218_s_at	1215.57	661.733	1380.9	1131.32	773.367	1229.1	Ywhaz	Mm.3360	tyrosine 3-monooxygenase/tryptophan 5-monooxygenase activation protein, zeta polypeptide
1448219_a_at	5688	4843.9	5825.77	7994.2	5028.4	4580.83	Ywhaz	Mm.3360	tyrosine 3-monooxygenase/tryptophan 5-monooxygenase activation protein, zeta polypeptide
1420828_s_at	8692.03	3851.47	2498.17	5735.2	2417.4	2414.23	Ywhaq	Mm.289630	tyrosine 3-monooxygenase/tryptophan 5-monooxygenase activation protein, theta polypeptide
1420829_a_at	9522.67	8834.67	8337.2	5211.3	4243.83	4425.43	Ywhaq	Mm.289630	tyrosine 3-monooxygenase/tryptophan 5-monooxygenase activation protein, theta polypeptide
1420830_x_at	14255.1	14694.8	15632	8667.62	6752.03	7145.4	Ywhaq	Mm.289630	tyrosine 3-monooxygenase/tryptophan 5-monooxygenase activation protein, theta polypeptide
1432842_s_at	13459.6	12782.5	7430.73	13034.8	7061.4	6836.63	Ywhaq	Mm.289630	tyrosine 3-monooxygenase/tryptophan 5-monooxygenase activation protein, theta polypeptide
1437608_x_at	12089.2	11764.9	8847.1	5278.12	3944.9	4394.17	Ywhaq	Mm.289630	tyrosine 3-monooxygenase/tryptophan 5-monooxygenase activation protein, theta polypeptide
1454378_at	127.967	84.9333	118.933	81.04	95.9	109	Ywhaq	Mm.289630	Tyrosine 3-monooxygenase/tryptophan 5-monooxygenase activation protein, theta polypeptide
1460590_s_at	17355.6	19265.6	21285.2	13793.5	10867.7	13372.5	Ywhaq	Mm.289630	tyrosine 3-monooxygenase/tryptophan 5-monooxygenase activation protein, theta polypeptide
1460621_x_at	18190.7	21498	25155.7	13316.3	12351	14490.3	Ywhaq	Mm.289630	tyrosine 3-monooxygenase/tryptophan 5-monooxygenase activation protein, theta polypeptide
1416004_at	8955.87	5376.17	5061.53	6692.12	4054.73	3274.27	Ywhah	Mm.332314	tyrosine 3-monooxygenase/tryptophan 5-monooxygenase activation protein, eta polypeptide
1420816_at	17.2	7.83333	7.26667	5.46	6.63333	10.2333	Ywhag	Mm.233813	3-monooxygenase/tryptophan 5-monooxygenase activation protein, gamma polypeptide
1420817_at	1434.93	467	444.367	634.28	483.833	468.8	Ywhag	Mm.233813	3-monooxygenase/tryptophan 5-monooxygenase activation protein, gamma polypeptide
1450012_x_at	7206.13	2268.83	2231.73	2907.5	1679.07	2276.23	Ywhag	Mm.233813	3-monooxygenase/tryptophan 5-monooxygenase activation protein, gamma polypeptide
1459693_x_at	41.6333	46.0667	54.1667	54.94	47.0667	50.6333	Ywhag	Mm.233813	3-monooxygenase/tryptophan 5-monooxygenase activation protein, gamma polypeptide
1426384_a_at	6919.37	6543.6	7580.4	6761.72	4407.73	4542.37	Ywhae	Mm.234700	tyrosine 3-monooxygenase/tryptophan 5-monooxygenase activation protein, epsilon polypeptide
1426385_x_at	8707.3	10812.7	8910.43	11988.6	6771.9	6681.23	Ywhae	Mm.234700	tyrosine 3-monooxygenase/tryptophan 5-monooxygenase activation protein, epsilon polypeptide
1435702_s_at	3108.17	3444.7	4308.53	2310.82	1680.87	3023.67	Ywhae	Mm.234700	tyrosine 3-monooxygenase/tryptophan 5-monooxygenase activation protein, epsilon polypeptide
1438839_a_at	13804.9	14595.2	14336.8	16088.5	9607.3	8743.23	Ywhae	Mm.234700	tyrosine 3-monooxygenase/tryptophan 5-monooxygenase activation protein, epsilon polypeptide
1440841_at	252.233	195.767	181.433	107.3	138.7	314.767	Ywhae	Mm.234700	Tyrosine 3-monooxygenase/tryptophan 5-monooxygenase activation protein, epsilon polypeptide
1457173_at	87.7333	98.7	73.8	42.76	54.2	187.833	Ywhae	Mm.234700	Tyrosine 3-monooxygenase/tryptophan 5-monooxygenase activation protein, epsilon polypeptide
1420878_a_at	408.067	689.533	385.967	1342.94	1091.57	741.867	Ywhab	Mm.34319	tyrosine 3-monooxygenase/tryptophan 5-monooxygenase activation protein, beta polypeptide
1420879_a_at	4452.07	4655.47	4962.53	7073.76	6691.23	4801.8	Ywhab	Mm.34319	tyrosine 3-monooxygenase/tryptophan 5-monooxygenase activation protein, beta polypeptide
1420880_a_at	16186.6	21995.4	22729.5	18759.3	20861.9	18966.4	Ywhab	Mm.34319	tyrosine 3-monooxygenase/tryptophan 5-monooxygenase activation protein, beta polypeptide
1436783_x_at	12082.7	15298.2	16616.1	16716.9	16452.8	16123.2	Ywhab	Mm.34319	tyrosine 3-monooxygenase/tryptophan 5-monooxygenase activation protein, beta polypeptide
1438708_x_at	881.733	1300.77	1093.47	539.6	873.233	661.7	Ywhab	Mm.34319	tyrosine 3-monooxygenase/tryptophan 5-monooxygenase activation protein, beta polypeptide
1455815_a_at	20644.6	27794.6	34924.7	24787.8	26374.4	28360.4	Ywhab	Mm.34319	tyrosine 3-monooxygenase/tryptophan 5-monooxygenase activation protein, beta polypeptide
1426840_at	2280.27	1647.1	1238.3	1014.6	1378	1705.17	Ythdf3	Mm.23834	YTH domain family 3
1426841_at	708.633	1028.67	705.3	1352.2	1203.53	1185.63	Ythdf3	Mm.23834	YTH domain family 3
1426842_at	628.633	1133.27	1835.8	1996.84	1588.47	2105.3	Ythdf3	Mm.23834	YTH domain family 3
1445235_at	65.3333	153.433	131.5	68.76	66.8	226.1	Ythdf3	Mm.23834	YTH domain family 3
1451317_at	1634	2441.53	1829.83	2852.36	3540.23	2824.8	Ythdf2	Mm.23998	YTH domain family 2
1460357_at	1129.5	978.8	842.667	757.84	1306.2	1142.97	Ythdf2	Mm.23998	YTH domain family 2
1415767_at	1214.73	2156.37	2274.83	2972.06	1785.73	2114.5	Ythdf1	Mm.30205	YTH domain family 1
1437102_at	525.4	769.467	1098.53	1558.86	975.3	1816.83	Ythdf1	Mm.30205	YTH domain family 1
1437456_x_at	5255.97	8950	10339.4	10630.1	7548.7	9374.1	Ythdf1	Mm.30205	YTH domain family 1
1437357_at	671.567	657.8	364.967	392.68	297.767	492.4	Ythdc2	Mm.244482	YTH domain containing 2
1434744_at	482.133	706.1	792.533	1292.18	1609.33	960.2	Yrdc	Mm.258568	yrdC domain containing (E.coli)
1433593_at	721.4	657.067	726.6	694.46	537.467	720.233	Ypel5	Mm.277533	yippee-like 5 (Drosophila)
1451196_at	1796.73	2684.87	2893.13	3218.7	2466.1	1675.43	Ypel5	Mm.277533	yippee-like 5 (Drosophila)
1426624_a_at	2810.37	1959.93	1981.17	1438.64	1081.93	1478.73	Ypel3	Mm.27114	yippee-like 3 (Drosophila)
1434277_a_at	8280.9	2356.8	4629.83	3356.06	5899.7	2555.93	Ypel2	Mm.191894	yippee-like 2 (Drosophila)
1438331_at	931.833	329.267	313.167	190.72	299.167	492.767	Ypel2	Mm.191894	Yippee-like 2 (Drosophila)
1440560_at	241.867	100.1	125.6	63.84	106.1	149.4	Ypel2	Mm.191894	Yippee-like 2 (Drosophila)
1443709_at	11.2	11.4	3.26667	20.76	19.9667	16.1333	Ypel2	Mm.191894	Yippee-like 2 (Drosophila)
1453414_at	205.833	35.0333	67.9667	51.08	50.4333	53.5667	Ypel2	Mm.191894	yippee-like 2 (Drosophila)
1454901_at	2658.23	721.2	948.2	1005.8	1968.27	782.733	Ypel2	Mm.191894	yippee-like 2 (Drosophila)
1421048_a_at	258.467	70.8667	87.4	131.54	18.1667	79.5333	Ypel1	Mm.237941	yippee-like 1 (Drosophila)
1431781_at	51.9333	70.3333	131.7	66.52	87.0333	89.9	Ypel1	Mm.237941	yippee-like 1 (Drosophila)
1431782_s_at	50.7667	10.4	24	38.84	43	28.8333	Ypel1	Mm.237941	yippee-like 1 (Drosophila)
1442660_at	206.733	165	139.233	87.22	158.6	181.9	Ypel1	Mm.237941	Yippee-like 1 (Drosophila)
1436976_a_at	872.467	785.867	2088.4	451.92	353.133	873.3	Yod1	Mm.106553	YOD1 OTU deubiquitinating enzyme 1 homologue (S. cerevisiae)
1423360_at	192.3	382.2	359.7	271.48	268.367	235.333	Yme1l1	Mm.23335	YME1-like 1 (S. cerevisiae)
1423361_at	472.633	823.367	653.5	757.1	508.167	571.1	Yme1l1	Mm.23335	YME1-like 1 (S. cerevisiae)
1437822_at	131.3	74.9	58.7333	50.24	65.2	110.833	Yme1l1	---	YME1-like 1 (S. cerevisiae)
1450954_at	737.233	719.967	593	575.6	556.167	632.1	Yme1l1	Mm.23335	YME1-like 1 (S. cerevisiae)
1424532_at	1136.8	1232.9	1435.63	959.4	1148.93	1072.27	Ylpm1	Mm.153183	YLP motif containing 1
1443773_at	369.367	194.1	168.133	110.3	125.9	123.5	Ylpm1	Mm.153183	YLP motif containing 1
1457514_at	24.0667	34.8667	52.2	22.94	15.9667	23.7	Ylpm1	Mm.153183	YLP motif containing 1
1448464_at	1636.77	895.6	947.533	2000.18	1291.43	1029.83	Ykt6	Mm.294821	YKT6 homolog (S. Cerevisiae)
1460191_at	151.567	46.3	54.9667	87.74	87.4	59.2667	Ykt6	Mm.294821	YKT6 homolog (S. Cerevisiae)
1422927_at	80.7667	102.167	130.067	76.56	138.933	87.1667	Yipf7	Mm.154776	Yip1 domain family, member 7
1430024_at	109.733	136	206.467	279.02	149.167	176.167	Yipf6	Mm.212290	Yip1 domain family, member 6
1441485_at	89.4667	66.8333	56.2	51.3	35.2667	77.7667	Yipf6	Mm.212290	Yip1 domain family, member 6
1455111_at	2073.53	2718.43	3293.33	1952.32	1886.87	2328.43	Yipf6	Mm.212290	Yip1 domain family, member 6
1418576_at	2695	1961.17	1476.8	2956	2679.93	2184	Yipf5	Mm.270382	Yip1 domain family, member 5
1444289_at	228.867	377.867	302.267	274.56	317.667	238	Yipf5	Mm.270382	Yip1 domain family, member 5
1449142_a_at	1997.53	1790.9	1450	2710.54	2393	2097.03	Yipf5	Mm.270382	Yip1 domain family, member 5
1426416_a_at	960.933	1768.47	1144.17	1529.42	1382	983.433	Yipf4	Mm.41891	Yip1 domain family, member 4
1426417_at	400.733	322.233	380.067	172.46	230.2	298.867	Yipf4	Mm.41891	Yip1 domain family, member 4
1450418_a_at	916.067	1042	716.867	641.16	872.967	733.167	Yipf4	Mm.41891	Yip1 domain family, member 4
1444012_at	88.1667	106.433	82.7	117.76	67.4	84.1	Yipf3	Mm.248769	Yip1 domain family, member 3
1451284_at	1170.5	1162.5	1100.07	1602.78	1195.27	841.467	Yipf3	Mm.248769	Yip1 domain family, member 3
1420668_a_at	319.267	295.167	349.967	244.42	341	227.433	Yipf2	Mm.178115	Yip1 domain family, member 2
1438415_s_at	1081.77	1054.63	1700.17	861.08	987.233	748.433	Yipf2	Mm.178115	Yip1 domain family, member 2
1442245_at	80.7333	56.5	38.6667	24.22	43.7	29.0667	Yipf2	Mm.178115	Yip1 domain family, member 2
1424196_at	1496.53	1124.5	1283.4	1835.5	1471.6	880.4	Yipf1	Mm.29118	Yip1 domain family, member 1
1442647_at	59.7667	21.5	48.8667	22.02	17.9667	22.3	Yipf1	Mm.29118	Yip1 domain family, member 1
1428445_at	1659.17	1557.83	1721.37	2005.5	3415.63	1102.93	Yif1b	Mm.36699	Yip1 interacting factor homolog B (S. cerevisiae)
1423939_a_at	4063.67	3701.57	5033	4540.68	3698.17	2766.97	Yif1a	Mm.44202	Yip1 interacting factor homolog A (S. cerevisiae)
1423940_at	1274.7	838.8	627.467	1493.06	1181.77	462.567	Yif1a	Mm.44202	Yip1 interacting factor homolog A (S. cerevisiae)
1456134_x_at	319.333	292.5	386.433	304.44	357.933	280.433	Yif1a	Mm.44202	Yip1 interacting factor homolog A (S. cerevisiae)
1418470_at	34.0667	72.3667	47.8	118.02	96.3	72.9333	Yes1	Mm.4558	Yamaguchi sarcoma viral (v-yes) oncogene homolog 1
1449090_a_at	573.967	1430.87	1703.4	2624.86	2141.3	1711.03	Yes1	Mm.4558	Yamaguchi sarcoma viral (v-yes) oncogene homolog 1
1456843_at	73.8	138.1	224.3	164.72	351.567	359.633	Yes1	Mm.4558	Yamaguchi sarcoma viral (v-yes) oncogene homolog 1
1458878_at	35.1333	146.833	213.633	268.84	136.8	166.133	Yes1	Mm.4558	Yamaguchi sarcoma viral (v-yes) oncogene homolog 1
1423105_a_at	1416.2	1151.97	1796.3	1827.72	1576	1568.27	Yeats4	Mm.233529	YEATS domain containing 4
1447943_x_at	577.833	441.5	578.733	498.82	443.433	388.133	Yeats2	Mm.390895	YEATS domain containing 2
1459108_a_at	202.167	229.4	213.133	259.88	223.433	192.567	Yeats2	Mm.390895	YEATS domain containing 2
1420762_a_at	12.3667	43.9333	33.0667	12.92	50.9	16.1333	Ybx2	Mm.29286	Y box protein 2
1418624_at	6514.23	14566.9	13204.8	15609.5	13938.1	17165.5	Ybx1	Mm.258204	Y box protein 1
1430720_at	18.6	27.2667	20.4667	15.34	13.6667	22.5667	Ybx1	---	Y box protein 1
1438064_at	144.533	153.3	195.633	77.2	93.2333	257.067	Ybx1	Mm.258204	Y box protein 1
1430134_a_at	174.133	101.9	82.8333	139.9	135.567	146.5	Yars2	Mm.37486	tyrosyl-tRNA synthetase 2 (mitochondrial)
1439442_x_at	375.9	214.3	385.967	197.6	213.4	322.1	Yars2	Mm.37486	tyrosyl-tRNA synthetase 2 (mitochondrial)
1460638_at	978.9	757.167	458.633	1261.18	826.033	459.567	Yars	Mm.145488	tyrosyl-tRNA synthetase
1416487_a_at	62.0667	240.667	160.767	393.24	184.233	183.233	Yap1	Mm.221992	yes-associated protein 1
1448363_at	966.033	6635.43	5564.97	5684.5	4786.5	4223.57	Yap1	Mm.221992	yes-associated protein 1
1423399_a_at	1388.63	1318.2	1628.5	2866.76	1099.93	952.5	Yaf2	Mm.4714	YY1 associated factor 2
1429839_a_at	4636.73	6867.13	9907	9288.36	4267.47	5081.47	Yaf2	Mm.4714	YY1 associated factor 2
1446073_at	61.3667	91.5333	95.9667	84.14	61.4	116.3	Yaf2	Mm.4714	YY1 associated factor 2
1452515_a_at	59.3333	61.8	39.3667	177.98	164.033	53.0667	Xylt2	Mm.100638	xylosyltransferase II
1426706_s_at	49.1667	28.3667	3.73333	22.26	73.8333	35.4	Xylb	Mm.219497	xylulokinase homolog (H. influenzae)
1427221_at	1643.27	6880.37	364.467	2462.62	2.33333	6.76667	Xtrp3s1	Mm.41963	X transporter protein 3 similar 1 gene
1422842_at	453.433	523.333	832.933	684.12	410.667	729.5	Xrn2	Mm.3065	5'-3' exoribonuclease 2
1422843_at	141.767	153.667	150.9	128.72	140.633	170.833	Xrn2	Mm.3065	5'-3' exoribonuclease 2
1450777_at	508.3	697	467.1	1097.74	774.867	923.8	Xrn2	Mm.3065	5'-3' exoribonuclease 2
1450308_a_at	246	318.567	291.9	169.82	207.467	265.267	Xrn1	Mm.291179	5'-3' exoribonuclease 1
1453380_a_at	113.133	135.533	107.067	141.36	145.667	39.6333	Xrcc6bp1	Mm.276769	XRCC6 binding protein 1
1417437_at	744.067	339.167	240.6	525.26	395.767	291.6	Xrcc6	Mm.288809	X-ray repair complementing defective repair in Chinese hamster cells 6
1428504_at	2.8	19.5667	14.1	17.36	3.9	12.7333	Xrcc6	Mm.288809	X-ray repair complementing defective repair in Chinese hamster cells 6
1442250_at	62.5	55.6667	43.6	26.18	52.3333	47.7	Xrcc6	Mm.288809	X-ray repair complementing defective repair in Chinese hamster cells 6
1451968_at	216.067	48	45.4	204.26	36.6667	106.033	Xrcc5	Mm.246952	X-ray repair complementing defective repair in Chinese hamster cells 5
1424601_at	377.533	291.2	293.333	402.6	394	358.567	Xrcc4	Mm.37531	X-ray repair complementing defective repair in Chinese hamster cells 4
1424602_s_at	368.5	419.133	356.9	416.04	348.4	380.467	Xrcc4	Mm.37531	X-ray repair complementing defective repair in Chinese hamster cells 4
1445922_at	43.1	25.5667	25.6667	11.98	25	37.8	Xrcc4	Mm.37531	X-ray repair complementing defective repair in Chinese hamster cells 4
1437623_x_at	287.767	14.3667	8.63333	35.56	12.5	12.6667	Xrcc3	Mm.19082	X-ray repair complementing defective repair in Chinese hamster cells 3
1452748_at	340.867	18.4333	24.8	40.04	46.5667	44.8667	Xrcc3	Mm.19082	X-ray repair complementing defective repair in Chinese hamster cells 3
1453950_a_at	20.9	21.0333	29.0333	14.82	11.5333	12.2	Xrcc2	Mm.143767	X-ray repair complementing defective repair in Chinese hamster cells 2
1455335_at	210.833	277.4	229.4	110.52	212.067	175.767	Xrcc2	Mm.143767	X-ray repair complementing defective repair in Chinese hamster cells 2
1416587_a_at	690.067	665.433	647.9	717.32	741.733	511.267	Xrcc1	Mm.4347	X-ray repair complementing defective repair in Chinese hamster cells 1
1426053_a_at	67.8667	69.5333	49.6667	78.46	81.0667	64.5333	Xpr1	Mm.266215	xenotropic and polytropic retrovirus receptor 1
1426992_at	2274.6	2726.1	3255.47	2776.22	1338.17	1643.33	Xpr1	Mm.266215	xenotropic and polytropic retrovirus receptor 1
1426993_at	84.5667	88.8	90.6333	76.84	74.4667	71.9667	Xpr1	Mm.266215	xenotropic and polytropic retrovirus receptor 1
1437958_at	275.333	277.367	338.5	203.94	159.6	304.8	Xpr1	Mm.266215	xenotropic and polytropic retrovirus receptor 1
1444168_at	85.3333	117.967	69.2333	59.4	62.4667	85.3333	Xpr1	Mm.266215	xenotropic and polytropic retrovirus receptor 1
1444267_at	16.2	20.4	23.8667	15.28	18.2667	21.6333	Xpr1	Mm.266215	Xenotropic and polytropic retrovirus receptor 1
1450130_at	119.433	197.333	179.633	221.64	133.767	115	Xpr1	Mm.266215	xenotropic and polytropic retrovirus receptor 1
1452271_at	640.633	925.567	780.6	766.76	422.2	568.3	Xpr1	Mm.266215	xenotropic and polytropic retrovirus receptor 1
1428772_at	1308.1	1228.03	1249	1360.06	1837.23	1263.67	Xpot	Mm.25042	exportin, tRNA (nuclear export receptor for tRNAs)
1428949_at	1967.9	3454.8	2813.6	2854.34	2975.73	1840.4	Xpot	Mm.25042	exportin, tRNA (nuclear export receptor for tRNAs)
1441681_at	13.0667	24	13.2333	15.38	16.8	8.66667	Xpot	Mm.25042	exportin, tRNA (nuclear export receptor for tRNAs)
1441682_s_at	1753.23	1788.6	2007.47	1799.74	2320.6	1692.13	Xpot	Mm.25042	exportin, tRNA (nuclear export receptor for tRNAs)
1415682_at	419.467	415.033	428.933	390.96	313.033	309.6	Xpo7	Mm.152987	exportin 7
1432573_at	13.5333	27.1667	14.8667	14.24	11.1	34.4333	Xpo7	Mm.152987	exportin 7
1435814_at	61.8667	34.0667	31.6	28.22	31.5	26.8	Xpo7	Mm.152987	exportin 7
1439411_a_at	6308.87	8287.93	10951.9	5419.8	4791.63	5929.3	Xpo7	Mm.152987	exportin 7
1442836_at	9.33333	20.8667	26.2	17.48	4.36667	21.5333	Xpo7	Mm.152987	exportin 7
1443089_at	13.5667	27.5333	23.6333	8.46	13.5333	6.4	Xpo7	Mm.152987	exportin 7
1446826_at	12.3333	7.2	2.56667	3.38	7.76667	10.1333	Xpo7	Mm.152987	exportin 7
1454281_at	28.6667	8.3	15.6333	9.54	18.0667	10.7	Xpo7	Mm.152987	exportin 7
1422759_a_at	1386.1	790.1	723.8	879.3	1124.6	787.633	Xpo6	Mm.235663	exportin 6
1440492_at	61.5333	9.23333	16.2	12.5	7.33333	37.2333	Xpo6	Mm.235663	Exportin 6
1443737_at	110.3	17.1	47.6333	34.18	54.5333	25.8667	Xpo6	Mm.235663	Exportin 6
1428560_at	537.833	287.5	172.333	319.8	384.267	238.1	Xpo5	Mm.275039	exportin 5
1451468_s_at	205.367	165.367	161.533	194.12	198.533	106.567	Xpo5	Mm.275039	exportin 5
1421054_at	140.033	260.367	362.7	260.12	270.1	509.167	Xpo4	Mm.202747	exportin 4
1430797_at	25.3667	30.8667	42	22.78	30.9333	39.1333	Xpo4	Mm.202747	exportin 4
1440663_at	49.7333	70.2333	46.2333	43.42	28.7333	93.8667	Xpo4	Mm.202747	Exportin 4
1442528_at	77.2	22.4333	40.0667	16.68	40.1667	133.633	Xpo4	Mm.202747	exportin 4
1418442_at	2080.2	3658.77	2411.93	2144.9	2265.93	2213.6	Xpo1	Mm.217547	exportin 1, CRM1 homolog (yeast)
1418443_at	1329.17	2124.33	2129.6	2166.2	1623.73	1872.9	Xpo1	Mm.217547	exportin 1, CRM1 homolog (yeast)
1448070_at	22.9333	60.3	29.8333	19.5	29.8333	7.6	Xpo1	Mm.217547	exportin 1, CRM1 homolog (yeast)
1437926_at	417.133	553.733	430.867	430.88	451.267	302.567	Xpnpep3	Mm.410525	X-prolyl aminopeptidase (aminopeptidase P) 3, putative
1417805_at	32.7333	25.3333	53.0333	31.1	21.2	141.533	Xpnpep2	Mm.129279	X-prolyl aminopeptidase (aminopeptidase P) 2, membrane-bound
1422443_at	1894.17	2908.97	2546	5096.84	3537.43	2343.37	Xpnpep1	Mm.99776	X-prolyl aminopeptidase (aminopeptidase P) 1, soluble
1422532_at	693	1220.87	783.167	861.52	3557.93	669.133	Xpc	Mm.2806	xeroderma pigmentosum, complementation group C
1437320_s_at	58.2667	39.0333	8.56667	11.56	9.53333	22.3333	Xpa	Mm.247036	xeroderma pigmentosum, complementation group A
1456002_at	5.9	1.5	1.1	9.5	5	2.2	Xpa	Mm.247036	xeroderma pigmentosum, complementation group A
1460725_at	210.4	154.967	248.8	263.38	262.833	178.333	Xpa	Mm.247036	xeroderma pigmentosum, complementation group A
1443483_at	8.7	4.83333	8.36667	17.76	12.9	10.8667	Xlr5d	Mm.255790	X-linked lymphocyte-regulated 5D
1430226_at	62.3667	40.5333	22.4667	45.06	21.6667	35.0667	Xlr4c	Mm.391293	X-linked lymphocyte-regulated 4C
1449347_a_at	289.667	249.933	236.067	109.02	227.867	564.4	Xlr4a /// Xlr4b /// Xlr4c /// Xlr4e	Mm.391293	X-linked lymphocyte-regulated 4B /// X-linked lymphocyte-regulated 4C /// X-linked lymphocyte-regulated 4A /// X-linked lymphocyte-regulated 4E
1429379_at	59.7667	10.8333	25.8	24.98	10063.8	21142.8	Xlkd1	Mm.396078	extra cellular link domain-containing 1
1453128_at	61.3667	24.4	56.2667	35.56	3839.47	11230.7	Xlkd1	Mm.396078	extra cellular link domain-containing 1
1454762_at	83.6667	14.9	68.6333	37.06	34.4	58.5667	Xkrx	---	X Kell blood group precursor related X linked
1439590_at	118.6	277.433	234.8	103.46	354.433	154.733	Xkr8	Mm.44558	X Kell blood group precursor related family member 8 homolog
1455704_at	101.267	189.233	121.3	176.36	294.2	81.7333	Xkr8	Mm.44558	X Kell blood group precursor related family member 8 homolog
1425928_at	69.4	40.4333	16.6333	14.48	28.2333	13.6667	Xkr6	Mm.234674	X Kell blood group precursor related family member 6 homolog
1439265_at	363	21.5333	2.4	14.54	42.3667	26.1667	Xkr6	Mm.234674	X Kell blood group precursor related family member 6 homolog
1455127_at	55.4	43.8	84.6667	62.6	84.0667	60.2333	Xkr5	Mm.111354	X Kell blood group precursor-related family, member 5
1435850_at	253.1	14.0667	6.06667	27.8	26	26.6	Xkr4	Mm.169928	X Kell blood group precursor related family member 4
1450189_at	10.6333	8.7	6.5	16.34	5.96667	6.6	Xk	Mm.56468	Kell blood group precursor (McLeod phenotype) homolog
1453866_a_at	10.1	18.2	35.2667	20.32	8.46667	4.93333	Xk	Mm.56468	Kell blood group precursor (McLeod phenotype) homolog
1427262_at	7264.37	2782.27	3782.07	2820.28	1481.2	6264.77	Xist	---	inactive X specific transcripts
1427263_at	1500.1	209.8	276.3	132.78	130.633	253.333	Xist	---	inactive X specific transcripts
1436936_s_at	11803.6	5013.7	5041.73	5434.22	3259.83	7840.07	Xist	---	inactive X specific transcripts
1451006_at	59.5	1226.8	655.6	8.98	976.233	1951.4	Xdh	Mm.11223	xanthine dehydrogenase
1422294_at	42.1667	27.9333	35.8	28.3	14.0333	10.2333	Xcr1	---	chemokine (C motif) receptor 1
1419412_at	34.4	18.5667	18.2	26.26	79.6333	40.9	Xcl1	Mm.190	chemokine (C motif) ligand 1
1420011_s_at	1488.1	2372.73	1691.63	2028.82	2888.4	4255.4	Xbp1	Mm.434371	X-box binding protein 1
1420012_at	192.633	195.8	194.833	168.4	199.267	277.133	Xbp1	Mm.434371	X-box binding protein 1
1420886_a_at	2637.2	4285.97	3107.53	4427.9	5804.97	7393.33	Xbp1	Mm.434371	X-box binding protein 1
1437223_s_at	5707.7	9849.33	9914.1	7387.8	9644.77	16653.7	Xbp1	Mm.434371	X-box binding protein 1
1436886_x_at	753.8	644.4	778.533	539.88	707.7	690.067	Xab2	Mm.23739	XPA binding protein 2
1437281_x_at	1133.03	1049.37	1060.1	823.92	1164.53	1002	Xab2	Mm.23739	XPA binding protein 2
1448278_at	743.267	726.867	594.667	666.68	769.633	550.733	Xab2	Mm.23739	XPA binding protein 2
1417390_at	1391	1673.53	2134.77	1262.42	1834.37	1559.67	Xab1	Mm.348649	XPA binding protein 1
1442114_at	124.333	287.067	231.8	120.72	188.733	159.3	Xab1	Mm.348649	XPA binding protein 1
1444781_at	51.9	47.8	14.7	10.28	51.1667	26.1667	Xab1	Mm.348649	XPA binding protein 1
1448134_at	647.4	1789.7	609.8	3810.92	1029.57	1696.03	X99384	Mm.269699	cDNA sequence X99384
1417241_at	971.933	897.833	800.5	800.02	508.5	598.767	X83328	Mm.291901	EST X83328
1434964_at	220.933	190.733	182.533	285.44	115.967	73.7	X83328	Mm.291901	EST X83328
1417817_a_at	275.5	2579.5	2728.3	6418.62	1998.67	2585.27	Wwtr1	Mm.405029	WW domain containing transcription regulator 1
1417818_at	1220.3	13989.6	14226.5	18208.5	7808.23	11381.6	Wwtr1	Mm.405029	WW domain containing transcription regulator 1
1437155_a_at	301.667	3057.43	3380.33	6283.28	2036.13	3054.13	Wwtr1	Mm.405029	WW domain containing transcription regulator 1
1458655_at	111.7	166.967	349.1	156.4	272.067	718.8	Wwtr1	Mm.405029	WW domain containing transcription regulator 1
1438482_at	82.5	38.7	61.5	16.14	43.6667	27.7	Wwp2	Mm.390058	WW domain containing E3 ubiquitin protein ligase 2
1448145_at	325.467	389.033	376.367	504.84	496.467	357.267	Wwp2	Mm.390058	WW domain containing E3 ubiquitin protein ligase 2
1448146_at	720.533	713.633	772.433	618.32	856.1	521.7	Wwp2	Mm.390058	WW domain containing E3 ubiquitin protein ligase 2
1456714_at	66.2667	41.6333	78.4	40.04	70.1667	62.6667	Wwp2	Mm.390058	WW domain containing E3 ubiquitin protein ligase 2
1457499_at	30.8333	13.2	18.4667	23.74	56.7	21.9	Wwp2	Mm.390058	WW domain containing E3 ubiquitin protein ligase 2
1427097_at	484.967	627.433	648.8	787.64	739.9	1045.5	Wwp1	Mm.78312	WW domain containing E3 ubiquitin protein ligase 1
1427098_at	361.3	184.033	167.7	143.66	180.1	361.6	Wwp1	Mm.78312	WW domain containing E3 ubiquitin protein ligase 1
1452299_at	1027.73	979.8	1216.9	481.24	771.233	1786.3	Wwp1	Mm.78312	WW domain containing E3 ubiquitin protein ligase 1
1416334_at	243.533	87.6667	92.4667	239.18	112.733	57.3333	Wwox	Mm.222224	WW domain-containing oxidoreductase
1431942_at	54.4	78.5	51.0333	62.5	74.6333	54.2333	Wwox	Mm.222224	WW domain-containing oxidoreductase
1431960_at	130.967	146.767	146.833	70.82	186.233	190.3	Wwox	Mm.222224	WW domain-containing oxidoreductase
1438517_at	123.433	90.2667	192.4	74.58	39.1	76.9667	Wwox	Mm.222224	WW domain-containing oxidoreductase
1442651_at	41.7667	44	26.3333	16.78	49.6667	38.7667	Wwox	Mm.222224	WW domain-containing oxidoreductase
1446412_at	35.7	26.8333	21.6	14.56	27.6	48.1333	Wwox	Mm.222224	WW domain-containing oxidoreductase
1417195_at	215.3	1072.13	902.733	687.56	853.567	859.8	Wwc2	Mm.235074	WW, C2 and coiled-coil domain containing 2
1417196_s_at	786.9	3216.13	3647.1	1608.22	1962.13	2987.7	Wwc2	Mm.235074	WW, C2 and coiled-coil domain containing 2
1417197_at	102.733	470.9	375.8	305.84	305.533	390.4	Wwc2	Mm.235074	WW, C2 and coiled-coil domain containing 2
1417198_at	3.16667	22.1667	28.5	15.1	25.1	23.7667	Wwc2	Mm.235074	WW, C2 and coiled-coil domain containing 2
1442539_at	29.6	55.7667	49.4	22.98	52.8667	127.567	Wwc2	Mm.235074	WW, C2 and coiled-coil domain containing 2
1448611_at	944.6	3148	3229.4	2092.08	3035.17	2466.3	Wwc2	Mm.235074	WW, C2 and coiled-coil domain containing 2
1420007_at	26.5667	18.2667	26.7	11.14	17.1667	27.7333	Wwc1	Mm.31267	WW, C2 and coiled-coil domain containing 1
1420009_at	31.9667	17.4333	23.5667	21.3	11.9667	51.0333	Wwc1	Mm.31267	WW, C2 and coiled-coil domain containing 1
1427261_at	487.833	3.63333	34.8	51.7	17.9667	401.367	Wwc1	Mm.31267	WW, C2 and coiled-coil domain containing 1
1445080_at	41.6667	64.7333	19.8667	31	78.5333	22.9667	Wwc1	Mm.31267	WW, C2 and coiled-coil domain containing 1
1433651_at	932.8	883.5	541.033	1257.6	1596.5	770.367	Wtip	Mm.436698	WT1-interacting protein
1438471_at	26.6667	29.5333	23.4333	28.58	19.8667	45.8333	Wtap	Mm.275521	Wilms' tumour 1-associating protein
1452401_at	3965.83	5661.13	6533.97	5064.58	3646.27	4578.97	Wtap	Mm.275521	Wilms' tumour 1-associating protein
1454805_at	1071.23	2095.37	1746.17	2185.56	1932.87	1493.87	Wtap	Mm.275521	Wilms' tumour 1-associating protein
1425995_s_at	5.53333	34.1	17.5333	18.36	29.2667	20.7667	Wt1	Mm.389339	Wilms tumor homolog
1439320_at	141.433	10.2	12.4333	12.56	9.2	8.13333	Wscd1	Mm.48648	WSC domain containing 1
1455845_at	3930.23	215.267	192.6	1113.6	85.4667	655.567	Wscd1	Mm.48648	WSC domain containing 1
1421846_at	440.2	465.133	585.1	958.98	587.5	639.2	Wsb2	Mm.28489	WD repeat and SOCS box-containing 2
1421847_at	3605.67	2488.13	2544.47	5232.54	3968.1	2949.4	Wsb2	Mm.28489	WD repeat and SOCS box-containing 2
1438129_at	203.133	152.8	156.4	166.58	275.833	339.2	Wsb2	---	WD repeat and SOCS box-containing 2
1425241_a_at	3300.93	4022	5756.6	3838.08	7318.83	7376.8	Wsb1	Mm.307022	WD repeat and SOCS box-containing 1
1429638_at	54.8667	40.5	12.6	48.5	27.9667	11.6	Wrnip1	Mm.286680	Werner helicase interacting protein 1
1448376_at	1125.67	1143.5	792.7	1057.26	975.133	885.1	Wrnip1	Mm.286680	Werner helicase interacting protein 1
1425074_at	252.6	347.6	372.5	184.94	446.9	425.267	Wrn	Mm.228805	Werner syndrome homolog (human)
1425982_a_at	32.0667	36.7667	27.7333	14.84	40.0333	39.2667	Wrn	Mm.228805	Werner syndrome homolog (human)
1450163_a_at	40.2667	42.8667	58.8	38	75.2333	48.2	Wrn	Mm.228805	Werner syndrome homolog (human)
1430312_at	67.7667	51.6	38.1333	23.58	52.1333	65.9	Wrb	Mm.255063	tryptophan rich basic protein
1460446_at	1308.6	885.1	766.233	682.5	675.8	544.933	Wrb	Mm.255063	tryptophan rich basic protein
1443197_at	39.9333	73.1	23.8333	17.16	1997.57	122.833	Wnt9b	Mm.215161	wingless-type MMTV integration site 9B
1451711_at	15.5	10.7333	12.3667	17.54	38.1	37.5	Wnt9b	Mm.215161	wingless-type MMTV integration site 9B
1425889_at	17.4667	24.4333	35.9667	31.42	25.8333	23.5667	Wnt9a	Mm.218794	wingless-type MMTV integration site 9A
1436978_at	116.467	88.1333	68	32.68	47.5	72.7333	Wnt9a	Mm.218794	wingless-type MMTV integration site 9A
1421439_at	5.2	1.8	10.6	11.26	14.0667	2.5	Wnt8b	Mm.88365	wingless related MMTV integration site 8b
1422228_at	39.2667	23.5667	38.2	22.24	23.1333	42	Wnt8a	Mm.558	wingless-related MMTV integration site 8A
1420891_at	57.0667	25.3	11.6667	22.78	14	6.13333	Wnt7b	Mm.306946	wingless-related MMTV integration site 7B
1420892_at	745.667	85.5667	127.1	127.68	96.0333	107.733	Wnt7b	Mm.306946	wingless-related MMTV integration site 7B
1423367_at	950.8	25.1	41.2333	35.7	9.33333	183.667	Wnt7a	Mm.56964	wingless-related MMTV integration site 7A
1447647_at	53.4667	50.8667	249.3	124.22	93.0333	130.833	Wnt7a	Mm.56964	wingless-related MMTV integration site 7A
1458334_at	7.2	23.6667	6	15.24	14.7333	21.2333	Wnt7a	Mm.56964	wingless-related MMTV integration site 7A
1419708_at	123.433	60.9667	118.767	91.86	125	115.233	Wnt6	Mm.268282	wingless-related MMTV integration site 6
1435980_x_at	21.6333	15.7667	8.53333	10.74	8.66667	12.9667	Wnt6	Mm.268282	wingless-related MMTV integration site 6
1422602_a_at	105.233	83.6667	45.5333	48.7	18.8667	17.9333	Wnt5b	Mm.321818	wingless-related MMTV integration site 5B
1433814_at	57.3667	80.0333	64.5333	63	79.3	79.1333	Wnt5b	Mm.321818	Wingless-related MMTV integration site 5B
1439373_x_at	127.733	180.1	130.667	90.86	37.8	46.6667	Wnt5b	Mm.321818	wingless-related MMTV integration site 5B
1443463_at	31.4333	21.2667	18.1	19.68	17.9667	25	Wnt5b	Mm.321818	Wingless-related MMTV integration site 5B
1447644_at	4.53333	21.9	22.6667	12.24	21.4667	8.33333	Wnt5b	Mm.321818	Wingless-related MMTV integration site 5B
1436791_at	158.733	552.567	346.033	240.72	20.6333	40.4333	Wnt5a	Mm.287544	wingless-related MMTV integration site 5A
1448818_at	81.2	200.567	272.2	130.66	19.5333	25.8	Wnt5a	Mm.287544	wingless-related MMTV integration site 5A
1456976_at	32.6667	49.2333	42.6333	54.76	32.9333	31.6333	Wnt5a	Mm.287544	wingless-related MMTV integration site 5A
1441687_at	94.0667	33.9333	51.4667	33	45.5333	51.1333	Wnt4	Mm.20355	wingless-related MMTV integration site 4
1450782_at	353.667	9.8	11.3333	44.54	109.4	64.4333	Wnt4	Mm.20355	wingless-related MMTV integration site 4
1422093_at	34.9667	12.6	83.8	39.84	37.1333	104.033	Wnt3a	Mm.1367	wingless-related MMTV integration site 3A
1446764_at	4.33333	6.76667	4.8	5.34	5.6	4.33333	Wnt3a	Mm.1367	Wingless-related MMTV integration site 3A
1450763_x_at	68.8667	5.7	1.53333	7.72	8.4	3.66667	Wnt3	Mm.159091	wingless-related MMTV integration site 3
1421465_at	16.7333	35.8333	7	23.9	37.1333	24.4667	Wnt2b	Mm.10740	wingless related MMTV integration site 2b
1449425_at	53	8.53333	19.2667	14.38	9505.43	331.9	Wnt2	Mm.33653	wingless-related MMTV integration site 2
1422941_at	29.4	6.5	22.7	11.46	23.0333	13.1	Wnt16	Mm.137403	wingless-related MMTV integration site 16
1450772_at	99.9667	93.7	107.567	76.5	85.0333	163.133	Wnt11	Mm.22182	wingless-related MMTV integration site 11
1426091_a_at	13.9333	12.3333	7.23333	8.88	9	10.1	Wnt10b	Mm.4709	wingless related MMTV integration site 10b
1460657_at	89.1	9.93333	59.6	29.78	54	23.8333	Wnt10a	Mm.5130	wingless related MMTV integration site 10a
1425377_at	20.6333	38.8333	20.9333	32.6	35.2667	28	Wnt1	Mm.1123	wingless-related MMTV integration site 1
1427196_at	51.3	112.833	112.467	77.54	32.8667	91.7	Wnk4	Mm.23656	WNK lysine deficient protein kinase 4
1444133_at	23.3333	28.5667	21.8	22.48	43.9667	13.4667	Wnk4	Mm.23656	WNK lysine deficient protein kinase 4
1443924_at	238.4	15.3333	16.6	36.72	17.5667	5.9	Wnk3	Mm.101344	WNK lysine deficient protein kinase 3
1453355_at	421.6	317.167	310.533	329.48	93.9	45.7333	Wnk2	Mm.342723	WNK lysine deficient protein kinase 2
1455424_at	137.3	70.4667	57.5333	41.46	5.96667	17.1	Wnk2	Mm.342723	WNK lysine deficient protein kinase 2
1433676_at	15589.4	15543.9	14398.4	7808.62	10052.6	12021.5	Wnk1	Mm.333349	WNK lysine deficient protein kinase 1
1436746_at	5743.3	3968.27	7313.5	1927.78	4309.57	3704.9	Wnk1	Mm.333349	WNK lysine deficient protein kinase 1
1437888_at	132.9	62.0667	52.8667	71.2	97.4333	56.9	Wnk1	Mm.333349	WNK lysine deficient protein kinase 1
1439970_at	270.333	61.6667	106.433	48.64	50.8333	335.767	Wnk1	Mm.333349	WNK lysine deficient protein kinase 1
1418202_a_at	264.133	263.367	260.033	220.54	247.2	217.933	Wiz	Mm.274948	widely-interspaced zinc finger motifs
1430330_at	44.5	55.2667	77.4667	60.34	23.5333	47.7	Wiz	Mm.274948	widely-interspaced zinc finger motifs
1434280_at	26.3333	20	20.6	20.24	17.9	29	Wiz	Mm.274948	Widely-interspaced zinc finger motifs
1419015_at	73.2333	53.9333	72.2	66.5	22.3	520.733	Wisp2	Mm.13828	WNT1 inducible signaling pathway protein 2
1448593_at	37.9333	27.6	43.9	13.7	1293.93	88.5333	Wisp1	Mm.10222	WNT1 inducible signaling pathway protein 1
1448594_at	16.9667	27.2333	21.5	20.74	875.467	44.0333	Wisp1	Mm.10222	WNT1 inducible signaling pathway protein 1
1428882_at	150.467	113.8	89.5	209.56	145.6	62.6333	Wipi2	Mm.29432	WD repeat domain, phosphoinositide interacting 2
1429367_at	1406	698.167	797.6	871.02	1166.7	817.933	Wipi2	Mm.29432	WD repeat domain, phosphoinositide interacting 2
1456999_at	115.433	108.3	85.6	95.2	152.233	154.4	Wipi2	Mm.29432	WD repeat domain, phosphoinositide interacting 2
1424917_a_at	293.533	116.333	213.5	304.52	180.367	85.9	Wipi1	Mm.35817	WD repeat domain, phosphoinositide interacting 1
1427323_s_at	437.933	222.867	222.2	314.76	323.433	180.2	Wipi1	Mm.35817	WD repeat domain, phosphoinositide interacting 1
1438709_at	188.767	73.1	190.633	145.92	115.167	59.4667	Wipi1	Mm.35817	WD repeat domain, phosphoinositide interacting 1
1439060_s_at	1635.63	953.933	1819.67	1621.98	1155.47	731	Wipi1	Mm.35817	WD repeat domain, phosphoinositide interacting 1
1452392_a_at	293	118.9	156.067	149.56	104.933	92.8667	Wipi1	Mm.35817	WD repeat domain, phosphoinositide interacting 1
1456624_at	265.233	158.967	186.467	224.24	327.467	107.433	Wipi1	Mm.35817	WD repeat domain, phosphoinositide interacting 1
1455301_at	341.933	54.6	53.3333	37.28	106.3	393.5	Wipf3	Mm.374909	WAS/WASL interacting protein family, member 3
1437298_at	807.167	491.067	701.967	433.7	335.733	560.7	Wipf2	Mm.28661	WAS/WASL interacting protein family, member 2
1442520_at	4.96667	31.7	30.8667	30.14	43.4667	10.1333	Wipf2	Mm.28661	WAS/WASL interacting protein family, member 2
1453737_at	56.3	64.5333	78.4	53.14	96.7	91.8333	Wipf2	Mm.28661	WAS/WASL interacting protein family, member 2
1436953_at	1179.83	683.367	706.033	874.8	1433.93	1172.97	Wipf1	Mm.223504	WAS/WASL interacting protein family, member 1
1436954_at	1214.37	658.633	576.467	673.78	1060.43	1039.5	Wipf1	Mm.223504	WAS/WASL interacting protein family, member 1
1447274_at	171.1	35.8667	18.2	39.46	165.7	179.233	Wipf1	Mm.223504	WAS/WASL interacting protein family, member 1
1447348_at	146.733	35.1	5.9	23.88	36.7333	179.033	Wipf1	Mm.223504	WAS/WASL interacting protein family, member 1
1425425_a_at	18.0333	2.16667	1.9	37.52	2.36667	120	Wif1	Mm.32831	Wnt inhibitory factor 1
1453315_at	6.7	7.83333	4.93333	19.1	4.46667	7.8	Wibg	Mm.27358	within bgcn homolog (Drosophila)
1427248_at	513.8	1436.8	628.433	1169.14	1059.23	713.967	Whsc2	Mm.332320	Wolf-Hirschhorn syndrome candidate 2 (human)
1442085_at	173	248.833	328.033	200.54	235.833	271.867	Whsc1l1	Mm.217337	Wolf-Hirschhorn syndrome candidate 1-like 1 (human)
1447931_at	1254.57	2147.03	2219.5	2407.8	1597.53	2597.97	Whsc1l1	Mm.217337	Wolf-Hirschhorn syndrome candidate 1-like 1 (human)
1455668_at	959.367	1179.1	873.5	711.4	1177.87	1236.03	Whsc1l1	Mm.217337	Wolf-Hirschhorn syndrome candidate 1-like 1 (human)
1457630_at	78.1	13.3	47.7333	31.88	60.0667	58.4333	Whsc1l1	Mm.217337	Wolf-Hirschhorn syndrome candidate 1-like 1 (human)
1457793_a_at	78.8333	56.3667	118.767	58.5	57.6	109.867	Whsc1l1	Mm.217337	Wolf-Hirschhorn syndrome candidate 1-like 1 (human)
1457794_at	182.067	78.4333	65.3667	43.9	71.8667	201.333	Whsc1l1	Mm.217337	Wolf-Hirschhorn syndrome candidate 1-like 1 (human)
1459907_a_at	49.9333	27.6333	31.2	79.46	76	107.733	Whsc1l1	Mm.217337	Wolf-Hirschhorn syndrome candidate 1-like 1 (human)
1428827_at	204.467	288.767	223.333	469.66	341.1	289.633	Whsc1	Mm.19892	Wolf-Hirschhorn syndrome candidate 1 (human)
1435136_at	432.733	119.7	133.833	122.04	123.433	186.767	Whsc1	Mm.19892	Wolf-Hirschhorn syndrome candidate 1 (human)
1436036_at	290.367	209.367	115.533	187.1	146.633	83.7333	Whsc1	Mm.332320	Wolf-Hirschhorn syndrome candidate 1 (human)
1443741_x_at	36.3	38.1667	50.1	32	60	38.0667	Whsc1	Mm.19892	Wolf-Hirschhorn syndrome candidate 1 (human)
1455228_at	627.9	227.333	170.167	291.06	215.067	202.567	Whsc1	Mm.19892	Wolf-Hirschhorn syndrome candidate 1 (human)
1432555_at	200.567	71.0333	205.5	96.22	106.367	147.2	Whrn	Mm.300397	whirlin
1436485_s_at	33.5667	1.63333	19.9	15.18	9.3	8.03333	Whrn	Mm.300397	whirlin
1436486_x_at	24.4667	7.83333	19.4667	50.86	25.2333	7.7	Whrn	Mm.300397	Whirlin
1442507_at	5.93333	7.96667	16.6667	7.46	10.3	10.2333	Whrn	Mm.300397	whirlin
1447438_at	30.4333	61.6	43.9	26.96	34.9667	20.8667	Whrn	Mm.300397	Whirlin
1436792_at	77.7333	120.233	105.133	104.96	225.833	131.8	Whdc1	Mm.181641	WAS protein homology region 2 domain containing 1
1438433_at	81.8667	69.3667	154.867	39.18	128.633	93.3667	Whdc1	Mm.181641	WAS protein homology region 2 domain containing 1
1448411_at	1115.5	658.5	842.533	668	733.6	521.667	Wfs1	Mm.20916	Wolfram syndrome 1 homolog (human)
1428811_at	29.3	48.4	60.3333	75.76	29.9	60.4667	Wfikkn2	Mm.342216	WAP, follistatin/kazal, immunoglobulin, kunitz and netrin domain containing 2
1427566_at	72.1667	55.2667	79.4667	92.7	173.167	161.067	Wfikkn1	Mm.328871	WAP, FS, Ig, KU, and NTR-containing protein 1
1457766_at	50.6	43.2667	37.7333	24.9	35.5	65.4	Wfdc6a	Mm.293365	WAP four-disulfide core domain 6A
1425418_at	20.4667	13.6	28.4667	10.42	29.7	9.33333	Wfdc5	Mm.218273	WAP four-disulfide core domain 5
1430224_at	65.8667	55.6333	63.7667	50.22	67.9	56.2333	Wfdc3	Mm.330770	WAP four-disulfide core domain 3
1460012_at	47.1667	51.2333	35.9	45.76	43.5667	44.0333	Wfdc3	Mm.330770	WAP four-disulfide core domain 3
1424351_at	74.8333	25.8333	48.7	20.44	16.0333	435.733	Wfdc2	Mm.27289	WAP four-disulfide core domain 2
1419195_at	40.6667	41.4667	30.6	33.12	49.1333	22.6667	Wfdc15b	Mm.330764	WAP four-disulfide core domain 15B
1436288_at	84.8333	60.5	66.3667	64.36	85.0333	68.1	Wfdc15a	Mm.142735	WAP four-disulfide core domain 15A
1449191_at	35.1333	13.2	22.3333	25.98	22.5667	55.6667	Wfdc12	Mm.6433	WAP four-disulfide core domain 12
1431335_a_at	167.067	4104.3	2802.7	1162.78	99.3333	378.567	Wfdc1	Mm.87599	WAP four-disulfide core domain 1
1416773_at	367.333	955.467	1303.93	1492.1	284.3	866.233	Wee1	Mm.287173	wee 1 homolog (S. pombe)
1416774_at	20.1667	45.5333	16.9	89.08	32.7667	48.9333	Wee1	Mm.287173	wee 1 homolog (S. pombe)
1434560_at	121.067	46.8	173.4	93.54	84.3667	79.9	Wdtc1	Mm.226576	WD and tetratricopeptide repeats 1
1453113_at	590.733	1258.83	995.6	1380.9	1587.73	673.2	Wdsub1	Mm.288734	WD repeat, SAM and U-box domain containing 1
1435442_at	2051.67	2549.57	2405	3716.28	3329.73	2103.27	Wdsof1	Mm.321937	WD repeats and SOF domain containing 1
1458778_at	27.7667	39.0667	23.8333	13.68	28.3	45.5	Wdsof1	---	WD repeats and SOF domain containing 1
1426767_at	287.833	290.767	233.533	344.58	225.667	208.467	Wdr90	---	WD repeat domain 90
1453433_at	119.9	127.3	94.4667	74.28	82.1	59.5333	Wdr89	Mm.341719	WD repeat domain 89
1429220_at	290.033	165.667	161.533	168.26	260.567	183.033	Wdr85	Mm.389248	WD40 repeat domain 85
1429221_at	4.56667	11.3333	5.5	7.88	8.93333	5.46667	Wdr85	Mm.389248	WD40 repeat domain 85
1452189_at	773.267	1278.37	1005.87	1310.58	1050.2	802.733	Wdr82	Mm.265125	WD repeat domain containing 82
1460234_at	684.6	420.667	502.9	331.2	951.1	462.933	Wdr81	Mm.340378	WD repeat domain 81
1423923_a_at	613.2	512.567	346.933	553.6	604.833	250.667	Wdr8	Mm.46508	WD repeat domain 8
1423808_at	486.967	172.067	111.767	197.2	186.633	54.8	Wdr79	Mm.31586	WD repeat domain 79
1456724_x_at	314.233	151.4	132.033	89.04	135.267	61.7667	Wdr79	Mm.31586	WD repeat domain 79
1434793_at	161.767	170.967	134.667	63.3	56.3	127.1	Wdr78	Mm.374877	WD repeat domain 78
1458621_at	3.5	3.96667	6.73333	3.36	4.23333	2.86667	Wdr78	Mm.374877	WD repeat domain 78
1422844_a_at	961.667	602.7	347.7	1008.64	593.1	444.033	Wdr77	Mm.5110	WD repeat domain 77
1430289_a_at	24.4	14.6333	11.9333	34.92	18.2	18.6667	Wdr77	Mm.5110	WD repeat domain 77
1434552_at	467.8	210.967	127.967	169.84	289.7	176.133	Wdr77	Mm.5110	WD repeat domain 77
1430304_at	25.0667	29	18.5667	34.98	45.4333	42.4667	Wdr76	---	WD repeat domain 76
1455674_at	57.3667	60.0333	48	48.18	98.9333	64.6667	Wdr76	---	WD repeat domain 76
1442296_at	98.0333	53.2667	58.3667	57.98	67.9333	73.2667	Wdr75	Mm.270376	WD repeat domain 75
1451649_a_at	549.233	765	769.8	804.34	653.067	534.467	Wdr75	Mm.270376	WD repeat domain 75
1416890_at	750.767	508.7	398.6	924.3	780.1	607.733	Wdr74	Mm.29627	WD repeat domain 74
1428677_at	370.533	226.6	228.5	230.04	560	264.733	Wdr73	Mm.274226	WD repeat domain 73
1428678_s_at	229.167	179.467	153.967	199.36	285.167	173.5	Wdr73	Mm.274226	WD repeat domain 73
1428858_at	572.333	490.467	601.967	461.88	394.6	437.8	Wdr70	Mm.321312	WD repeat domain 70
1455097_at	265.767	181.2	194.9	255.42	273.633	231.667	Wdr70	Mm.321312	WD repeat domain 70
1458981_at	19.1	21.2333	31.3	20.84	28.4333	60.0667	Wdr70	Mm.321312	WD repeat domain 70
1435028_at	2789.8	1201.43	1016.8	1252.92	1299.53	1040.03	Wdr7	Mm.30850	WD repeat domain 7
1441775_at	42.1667	25.9667	21.8333	22.84	32.1333	50.5333	Wdr7	Mm.30850	WD repeat domain 7
1429151_at	2870.43	3456.53	3879.97	2797.18	3003.57	2624.7	Wdr68	Mm.307455	WD repeat domain 68
1429385_at	187.8	104.233	67.0333	219.4	109.833	69.7667	Wdr68	Mm.307455	WD repeat domain 68
1429386_at	6.2	20.0667	16.3667	9.14	25.7667	14.6	Wdr68	Mm.307455	WD repeat domain 68
1439664_at	178.533	116.333	106.133	89.32	60.9333	108.1	Wdr68	Mm.307455	WD repeat domain 68
1434241_at	324.833	171.6	166.133	137.12	355.5	167.1	Wdr67	Mm.390835	WD repeat domain 67
1442286_at	128.5	54.3667	91.4	50.14	79.8333	57.7667	Wdr67	Mm.390835	WD repeat domain 67
1444689_at	71.1333	50.8	49.1667	21.5	35.4	22.9333	Wdr67	Mm.390835	WD repeat domain 67
1458158_at	63.8333	61.5	84.1333	46.06	95.9333	50.0333	Wdr67	Mm.390835	WD repeat domain 67
1430112_at	87.3333	25.9	48.4667	20.46	33.4667	28.6333	Wdr66	Mm.416118	WD repeat domain 66
1433062_at	72.3	42.5	58.3333	52.52	67.4333	81.6333	Wdr66	Mm.416118	WD repeat domain 66
1433063_at	37.3	21.2	65.9	44.24	42.8667	55.8333	Wdr66	Mm.416118	WD repeat domain 66
1447215_at	44.5333	34.8	16.6333	25.86	14.0667	15.7667	Wdr66	Mm.416118	WD repeat domain 66
1430082_at	37.9667	79.7667	65.8333	52.36	64.2333	69.3333	Wdr64	Mm.50361	WD repeat domain 64
1436675_at	45.0333	5.26667	9.5	3.68	11.4333	13.7667	Wdr63	Mm.235040	WD repeat domain 63
1424849_at	22.1667	33.1667	27.0667	55.1	67.4667	75.9333	Wdr62	Mm.271677	WD repeat domain 62
1431376_at	24.0667	8.53333	11.8	12.9	35.4	8.2	Wdr62	Mm.271677	WD repeat domain 62
1434433_x_at	179.9	77.6	92.1333	96.22	62.7667	77.5667	Wdr61	Mm.28437	WD repeat domain 61
1448102_a_at	4008.63	6872.67	6416.8	5451.74	4416	4604.9	Wdr61	Mm.28437	WD repeat domain 61
1454954_at	100.967	41.0667	47.3333	52.26	47.1333	84.5667	Wdr61	Mm.28437	WD repeat domain 61
1459985_at	1331.17	1644.9	1304.6	1752.42	1470.63	963.3	Wdr61	Mm.28437	WD repeat domain 61
1436396_at	200.667	145.1	145.433	181.22	178	126.7	Wdr60	Mm.436729	WD repeat domain 60
1415770_at	1557.53	525.833	462.9	1315.96	686.767	407	Wdr6	Mm.335454	WD repeat domain 6
1455940_x_at	4843.2	1703.4	2597.83	2563.4	1511.73	1445	Wdr6	Mm.335454	WD repeat domain 6
1453058_at	74.4	95.2	34.6667	43.02	72.5333	28.7667	Wdr5b	Mm.37802	WD repeat domain 5B
1456638_at	253.067	322.8	406.367	324.42	1158.13	397.933	Wdr59	Mm.247294	WD repeat domain 59
1428264_at	541.133	446.267	326.1	853.24	624.533	441.8	Wdr57	Mm.423019	WD repeat domain 57 (U5 snRNP specific)
1452713_a_at	2269.9	1631.43	1518.33	1892.94	1276.53	1936.3	Wdr57	Mm.423019	WD repeat domain 57 (U5 snRNP specific)
1426496_at	355.767	233.267	283.867	359.8	263.167	233.767	Wdr55	Mm.271719	WD repeat domain 55
1422616_s_at	281.467	151.733	118.367	105.72	75.7	83.3333	Wdr54	Mm.130665	WD repeat domain 54
1425980_at	33.0667	39.8333	41.2667	38.22	50.8667	31.7333	Wdr54	Mm.130665	WD repeat domain 54
1428839_at	66.1333	222	76.4667	92.2	149.967	83.1	Wdr53	Mm.159860	WD repeat domain 53
1428840_s_at	351.367	340.367	268.133	245.92	376.5	230.967	Wdr53	Mm.159860	WD repeat domain 53
1429325_at	86.5333	113.9	78.6333	139.7	138.867	88.8333	Wdr51b	---	WD repeat domain 51B
1453110_at	276.967	204.4	230.233	236.9	287.567	192.133	Wdr51b	---	WD repeat domain 51B
1432202_a_at	54.9	67.4333	37.3333	177.94	71.3	98.7333	Wdr51a	Mm.23054	WD repeat domain 51A
1416581_at	895.967	1378.3	1300.9	1599.62	1964.37	1010.6	Wdr5	Mm.28265	WD repeat domain 5
1448389_at	89.6333	79.5333	49.3333	135.62	121.1	41.3667	Wdr5	Mm.28265	WD repeat domain 5
1426723_at	492.467	582.733	481.267	360.44	511.3	333.167	Wdr48	Mm.104789	WD repeat domain 48
1443836_x_at	1908.13	2812.2	1344.6	1085.62	1943.3	916.2	Wdr48	Mm.104789	WD repeat domain 48
1447765_at	6.13333	8.23333	24.5	14.82	8.83333	18.9333	Wdr48	Mm.104789	WD repeat domain 48
1452162_at	284.867	411.933	292.767	467.96	315.4	303.733	Wdr48	Mm.104789	WD repeat domain 48
1434558_at	1345.27	605.233	424.9	323.94	390.9	464.8	Wdr47	Mm.285968	WD repeat domain 47
1437257_at	54.9333	27.3667	17.1	16.04	47.8333	26.1667	Wdr47	Mm.285968	WD repeat domain 47
1422709_a_at	130.4	86.1667	122.867	190.68	171.733	111.767	Wdr46	Mm.2437	WD repeat domain 46
1437828_s_at	800.433	525.267	446.2	991.96	702.533	497.167	Wdr46	Mm.2437	WD repeat domain 46
1416281_at	4124.6	5441.47	5223.83	7751.36	5554.3	7058.4	Wdr45l	Mm.103986	Wdr45 like
1424786_s_at	1425.4	1309.6	1528.37	1214.78	1276.3	1766.37	Wdr45	Mm.305725	WD repeat domain 45
1451754_a_at	1109.5	1019.3	826.267	995.3	979	1012.17	Wdr45	Mm.305725	WD repeat domain 45
1430775_at	32.2	3.26667	15.3	11.32	17.3667	26.0667	Wdr44	Mm.423	WD repeat domain 44
1435051_at	658.767	677.967	783.833	381.52	791.467	749.7	Wdr44	Mm.423	WD repeat domain 44
1428389_s_at	614.933	563.533	755.5	547.02	501.367	552.4	Wdr43	Mm.257762	WD repeat domain 43
1428390_at	639.433	1013.87	1079.97	1165.5	1050.8	964.5	Wdr43	Mm.257762	WD repeat domain 43
1434133_s_at	397.933	270.3	201.2	317.78	380.233	160.167	Wdr42a	Mm.159915	WD repeat domain 42A
1434134_at	716.9	807.2	945.367	662.66	940	684.533	Wdr42a	Mm.159915	WD repeat domain 42A
1433620_at	497.3	191.067	131.167	305	276	195.5	Wdr41	Mm.33856	WD repeat domain 41
1433621_at	255.867	67.7333	37.3667	130.7	121	73.7333	Wdr41	Mm.33856	WD repeat domain 41
1434170_at	1189	57.9333	52.0333	186.76	41.8333	10.6333	Wdr40b	Mm.55685	WD repeat domain 40B
1454869_at	879.633	16.2	45.0667	108.1	6.16667	13.8333	Wdr40b	Mm.55685	WD repeat domain 40B
1429392_at	230.933	225.967	253.4	465.56	371.767	232.233	Wdr40a	Mm.28891	WD repeat domain 40A
1429393_at	163.7	140.167	82.9333	209.08	179.967	95	Wdr40a	Mm.28891	WD repeat domain 40A
1430059_at	64.2667	141.9	119.633	49.02	120	206.7	Wdr40a	Mm.28891	WD repeat domain 40A
1438669_at	460.867	631.433	397.8	767.92	632.367	308.1	Wdr40a	Mm.28891	WD repeat domain 40A
1423138_at	299.133	230.567	203.2	349.26	272.633	173.7	Wdr4	Mm.143771	WD repeat domain 4
1423139_at	52.2	74.0333	59.0333	81.32	78.9667	52.5667	Wdr4	Mm.143771	WD repeat domain 4
1434522_at	91.3	23.7667	34.6	75.38	30.4	40.2	Wdr4	Mm.143771	WD repeat domain 4
1445109_at	16.2	21.3	42.1333	15.54	31.3333	20.8333	Wdr4	Mm.143771	WD repeat domain 4
1432614_at	28.6	14.7	23.0667	21.14	29.3	19.4667	Wdr37	Mm.284654	WD repeat domain 37
1432615_at	41.4	60.6333	88.7333	70.52	87.6333	98.9	Wdr37	Mm.284654	WD repeat domain 37
1434076_at	765.633	2311.83	2098.43	1587.98	1101.03	2500.07	Wdr37	Mm.284654	WD repeat domain 37
1434077_at	259.033	364.4	283.2	279.16	184.467	306.167	Wdr37	Mm.284654	WD repeat domain 37
1453024_at	177.833	443.733	499.567	304.58	139.167	357.933	Wdr37	Mm.284654	WD repeat domain 37
1454823_at	105.667	289.5	273.833	159.38	88.5333	256.167	Wdr37	Mm.284654	WD repeat domain 37
1455278_at	420.467	519.433	757.6	231.02	199.9	441.633	Wdr37	Mm.284654	WD repeat domain 37
1457609_at	70.2667	60.5	72.5667	81.78	94.5	69.1	Wdr37	Mm.284654	WD repeat domain 37
1423735_a_at	446.7	508.167	466.967	600.48	691.833	743.8	Wdr36	Mm.38816	WD repeat domain 36
1451087_at	324.167	246.033	228.3	309.02	371.333	282.5	Wdr36	Mm.38816	WD repeat domain 36
1440318_at	144.3	25.7667	24.7667	29.6	7.16667	67.4333	Wdr35	Mm.87389	WD repeat domain 35
1454790_at	470.967	25.8	30.0667	85.44	4.8	96.2	Wdr35	Mm.87389	WD repeat domain 35
1429174_at	389.4	50.3	56.0333	135.72	111.167	50.6667	Wdr34	Mm.88053	WD repeat domain 34
1418338_at	1251.1	1560.13	1965.7	1395.82	1269.57	1867.07	Wdr33	Mm.277705	WD repeat domain 33
1423874_at	66.4333	41.8667	62.6	43.44	29	27.7	Wdr33	Mm.277705	WD repeat domain 33
1444434_at	11.3333	78.5667	112.167	77.14	76.3	73.1667	Wdr33	Mm.277705	WD repeat domain 33
1444558_at	33.2	50.6	56.9	44.88	59.4667	40.3	Wdr33	Mm.277705	WD repeat domain 33
1453322_at	207.767	149.867	169.533	110.84	79.1667	189.233	Wdr33	Mm.277705	WD repeat domain 33
1453554_a_at	271.1	353.233	197	341.46	219.833	191.267	Wdr33	Mm.277705	WD repeat domain 33
1455281_at	169.633	103.367	81	51.4	88.5333	79.6667	Wdr33	Mm.277705	WD repeat domain 33
1456488_at	213.233	119.133	143.433	176.92	134.2	221.167	Wdr33	Mm.277705	WD repeat domain 33
1456825_at	344.3	81.1667	80.5	76.78	63.1	150.867	Wdr33	Mm.277705	WD repeat domain 33
1458255_at	4.1	7.2	7.96667	5.08	7.8	7.23333	Wdr33	Mm.277705	WD repeat domain 33
1438727_at	327.867	536.8	543.733	551.32	492.567	395.4	Wdr32	Mm.317668	WD repeat domain 32
1423636_at	84.4	44.4667	59.0333	60.04	16.2	51.2	Wdr31	Mm.155573	WD repeat domain 31
1459664_at	48.8	3.83333	7.6	22.46	2.56667	6.43333	Wdr31	Mm.155573	WD repeat domain 31
1433746_at	1331.23	1022.17	1591.5	1015.94	854.433	1120.17	Wdr3	Mm.24591	WD repeat domain 3
1445813_at	37.4	20.1333	20.1667	21.16	22.3667	20.3667	Wdr27	Mm.432548	WD repeat domain 27
1423961_at	823.9	793.3	441.233	1834.48	1006	1273.5	Wdr26	---	WD repeat domain 26
1423962_at	431.033	222.7	220.2	345.7	295.867	341.733	Wdr26	---	WD repeat domain 26
1423963_at	174.067	142.967	161.933	422.7	201.767	195.967	Wdr26	---	WD repeat domain 26
1435478_at	2176.83	3012.53	3758.77	4968.56	3434.83	3891.9	Wdr26	---	WD repeat domain 26
1438234_at	231.167	136.133	126.833	150.22	259.667	341.233	Wdr26	Mm.289082	WD repeat domain 26
1451188_at	3878.3	4767.67	5833.57	9240.9	7800.63	5890.27	Wdr26	Mm.289082	WD repeat domain 26
1456645_at	82.9	59.2333	77.8	72.04	85.5333	72.9	Wdr25	Mm.342082	WD repeat domain 25
1455212_at	586.333	438.433	267.467	509.16	486.867	367.6	Wdr24	Mm.95512	WD repeat domain 24
1448418_s_at	2192.9	2180.43	2112.17	2031.68	2381.43	1397.53	Wdr23	Mm.11535	WD repeat domain 23
1460189_at	1483.87	1089.77	1001.2	1074.18	1237.37	770.667	Wdr23	Mm.11535	WD repeat domain 23
1427649_at	23.5333	31.8333	47.8333	37.46	59.4	21.7	Wdr22	Mm.220310	WD repeat domain 22
1436438_s_at	943.8	355.3	369.433	359.38	291.033	223.733	Wdr22	Mm.220310	WD repeat domain 22
1446876_at	32.9	12.8667	12.5	9.2	4.7	19.6333	Wdr22	Mm.220310	WD repeat domain 22
1452435_at	52.5667	90.1	125.8	79.4	140.1	87.5667	Wdr22	Mm.220310	WD repeat domain 22
1455354_at	320.933	669.833	1110.7	763.82	855.567	562.333	Wdr22	Mm.220310	WD repeat domain 22
1455702_at	53.2	29.9	38.3667	28.44	42.2333	4.43333	Wdr22	Mm.220310	WD repeat domain 22
1424777_at	596.9	262.7	200.867	300.8	319.833	151.833	Wdr21	Mm.38238	WD repeat domain 21
1430004_s_at	32.3333	30.4	42.5	43.46	38	42.4333	Wdr20b	Mm.219475	WD repeat domain 20b
1453693_at	11.2	19.8667	6.4	16.84	13.7333	12.3333	Wdr20b	Mm.219475	WD repeat domain 20b
1428039_at	18.9333	2.93333	25	16.52	23.8667	10.3667	Wdr20a	---	WD repeat domain 20a
1431227_at	38.6	45.7333	14.9667	49.72	42.5333	61.6	Wdr20a	Mm.435546	WD repeat domain 20a
1449197_at	622.667	619	600.233	392.84	568.333	703.8	Wdr20a	Mm.435546	WD repeat domain 20a
1451220_at	866.6	1208.83	899.267	617.64	774.167	663.867	Wdr20a	Mm.435546	WD repeat domain 20a
1455669_at	337.367	393.7	311.167	263.32	231.267	156.333	Wdr19	Mm.127550	WD repeat domain 19
1459034_at	29.2	30.4	40.1	36.4	35.8	24.7667	Wdr19	Mm.127550	WD repeat domain 19
1433635_at	534.367	331.233	248.8	567.28	417.6	234.5	Wdr18	Mm.35828	WD repeat domain 18
1443758_at	13	18.7667	28.3333	25.62	36.4	29.6667	Wdr18	Mm.35828	WD repeat domain 18
1454695_at	256.4	234.8	161.233	127.98	248.1	136.933	Wdr18	Mm.35828	WD repeat domain 18
1460622_x_at	85.1333	131.933	168.4	133.14	77.4	130.733	Wdr18	Mm.35828	WD repeat domain 18
1435392_at	269.233	18.8667	8.93333	17.72	9.16667	21.3	Wdr17	Mm.95281	WD repeat domain 17
1453537_a_at	17.0333	8.66667	26.3667	13.44	20.1	22.6667	Wdr17	Mm.95281	WD repeat domain 17
1429552_at	109.6	29.2667	14.6	47.38	13.5333	52.1333	Wdr16	---	WD repeat domain 16
1432217_a_at	8.3	4.1	2.56667	9.54	8.46667	1.53333	Wdr16	---	WD repeat domain 16
1425490_a_at	44.6333	18.6667	26.0667	47.68	39.6667	41.0333	Wdr13	Mm.284162	WD repeat domain 13
1451728_at	1219.73	928.467	827.133	952.16	654.7	843.933	Wdr13	Mm.284162	WD repeat domain 13
1417270_at	106.267	90.6333	88.0667	75.1	34.3	47.5	Wdr12	Mm.281079	WD repeat domain 12
1448646_at	313.2	198.667	200.867	350.26	225.1	180.367	Wdr12	Mm.281079	WD repeat domain 12
1459762_x_at	6.46667	8.6	5.26667	6.72	11.6	5.16667	Wdr12	Mm.281079	WD repeat domain 12
1423054_at	640.9	792.5	521.267	2695.66	1001.9	783.767	Wdr1	Mm.2654	WD repeat domain 1
1437591_a_at	214.5	219.433	213.3	449.14	278.533	230.833	Wdr1	Mm.2654	WD repeat domain 1
1450851_at	730.067	1235.73	684.767	2090.96	1202.83	646.867	Wdr1	Mm.2654	WD repeat domain 1
1435114_at	287.533	116.567	165.9	255.54	175.9	268.3	Wdhd1	Mm.265615	WD repeat and HMG-box DNA binding protein 1
1435582_at	250.867	5.06667	11.6	24.7	72.5667	522.3	Wdfy4	---	WD repeat and FYVE domain containing 4
1427456_at	932.067	671.3	570.7	440.82	349.1	500.633	Wdfy3	Mm.332522	WD repeat and FYVE domain containing 3
1428517_at	3312.57	2031	2783.9	1746.72	1895.37	2476.37	Wdfy3	Mm.332522	WD repeat and FYVE domain containing 3
1445718_at	311.367	263.633	197.433	112.72	317.8	316.8	Wdfy3	Mm.332522	WD repeat and FYVE domain containing 3
1446109_at	57.9	33.3333	58.7333	45.78	59.1	60.2333	Wdfy3	Mm.332522	WD repeat and FYVE domain containing 3
1447433_at	56.3	110.067	111.267	96.36	116.8	101.4	Wdfy3	Mm.332522	WD repeat and FYVE domain containing 3
1458952_at	78.9667	58.5333	134.033	50.68	55.9333	101.733	Wdfy3	Mm.332522	WD repeat and FYVE domain containing 3
1459287_at	13.2	12.8	13.7333	13.4	25.9667	9.36667	Wdfy3	Mm.332522	WD repeat and FYVE domain containing 3
1459414_at	345.367	196.8	145.367	101.54	227.133	325.167	Wdfy3	Mm.332522	WD repeat and FYVE domain containing 3
1434517_at	1223.47	573.533	591.867	809.96	1791.23	917.867	Wdfy2	Mm.392194	WD repeat and FYVE domain containing 2
1424749_at	534.8	429.067	598.867	838.4	294.5	462.833	Wdfy1	Mm.293273	WD repeat and FYVE domain containing 1
1435588_at	494.1	278.033	141.9	412.4	148.367	195.933	Wdfy1	Mm.293273	WD repeat and FYVE domain containing 1
1437358_at	1896.7	1206.67	1001.63	1763.44	772.767	918.433	Wdfy1	Mm.293273	WD repeat and FYVE domain containing 1
1447543_at	12.1667	12.4	39.9	33.72	23.0333	26.0333	Wdfy1	Mm.293273	WD repeat and FYVE domain containing 1
1453426_a_at	51.5667	19.3333	12.3	20.32	26.2667	15.5667	Wdfy1	Mm.293273	WD repeat and FYVE domain containing 1
1454234_at	36.5333	24.6333	50.8667	24.04	33.8333	28	Wbscr28	Mm.159750	Williams-Beuren syndrome chromosome region 28 (human)
1418359_at	98.4667	73.6667	47	233.14	205.367	164.067	Wbscr27	Mm.34235	Williams Beuren syndrome chromosome region 27 (human)
1430644_at	6.93333	6.33333	19.6	29.04	59.1	22.3	Wbscr25	---	Williams Beuren syndrome chromosome region 25 (human)
1423575_a_at	688.8	727.4	704.233	928.38	1293.73	672.7	Wbscr22	Mm.178012	Williams Beuren syndrome chromosome region 22
1418081_at	1309.67	1433.97	1223.23	1203.36	1258.37	958.1	Wbscr18	---	Williams-Beuren syndrome chromosome region 18 homolog (human)
1416622_at	391.5	312.233	261	387.38	372.467	305.467	Wbscr16	Mm.29508	Williams-Beuren syndrome chromosome region 16 homolog (human)
1452916_at	800.767	1079.97	1006.17	810.74	1088.47	1062.03	Wbp7	Mm.168688	WW domain binding protein 7
1451230_a_at	6933.77	15133.4	20448.3	14112.3	13727.2	6268.13	Wbp5	Mm.512	WW domain binding protein 5
1419374_at	913	2516	2972.6	2102.56	1768.5	2358.8	Wbp4	Mm.20938	WW domain binding protein 4
1419375_at	1039.4	1296.67	1051.77	831.1	947.733	691.533	Wbp4	Mm.20938	WW domain binding protein 4
1431578_at	95.4	151.467	126.933	69.78	137.467	195.867	Wbp2nl	Mm.159315	WBP2 N-terminal like
1448121_at	2838.37	1520.33	1466.1	1673.3	1561.07	940.8	Wbp2	Mm.284792	WW domain binding protein 2
1415799_at	2190.1	2858	2474.03	2585.64	2866.17	2262.63	Wbp11	Mm.141197	WW domain binding protein 11
1430987_s_at	79.6667	85.5667	112.067	90.46	82	120.367	Wbp11	Mm.141197	WW domain binding protein 11
1447401_at	40.1333	61.4333	120.333	19.78	18.2667	105.733	Wbp11	Mm.141197	WW domain binding protein 11
1449441_a_at	1222.97	1185.13	1279.93	1839.72	1159.17	717.5	Wbp1	Mm.1109	WW domain binding protein 1
1426776_at	2484.77	3644.07	4344.07	3480.18	6038.97	3630.83	Wasl	Mm.1574	Wiskott-Aldrich syndrome-like (human)
1426777_a_at	686.933	671.3	642.4	629.06	1127.4	600.6	Wasl	Mm.1574	Wiskott-Aldrich syndrome-like (human)
1432155_at	105.4	205.7	265.1	187.2	213.033	145.433	Wasl	Mm.1574	Wiskott-Aldrich syndrome-like (human)
1439832_at	129.9	75.6	80.0667	54.18	92.4333	174.7	Wasl	Mm.1574	Wiskott-Aldrich syndrome-like (human)
1452193_a_at	6016.83	7694.13	11666.3	6344.44	10428.7	8286.17	Wasl	Mm.1574	Wiskott-Aldrich syndrome-like (human)
1425061_at	11	39.4	22.1333	22.6	10.7667	20.7333	Wasf3	Mm.332849	WAS protein family, member 3
1444243_at	4.7	16.4667	12.6667	5.1	7.8	9.06667	Wasf3	Mm.332849	WAS protein family, member 3
1438683_at	271.533	696.8	859	538.44	300.567	621.767	Wasf2	Mm.23566	WAS protein family, member 2
1454673_at	3684.93	10295.7	8511.13	6857.04	5599.23	8610.37	Wasf2	Mm.23566	WAS protein family, member 2
1418545_at	2478.37	57.6333	58.9	138.3	24.7333	47.0667	Wasf1	Mm.41353	WASP family 1
1440438_at	25.8333	2.86667	18.3	9.54	10.0667	2.2	Wasf1	Mm.41353	WASP family 1
1419631_at	184.067	38.4333	38.1667	36.28	112.3	130.333	Was	Mm.4735	Wiskott-Aldrich syndrome homolog (human)
1429279_at	122.567	242.1	192.133	277.68	213.133	157.067	Wars2	Mm.316754	tryptophanyl tRNA synthetase 2 (mitochondrial)
1435273_at	136.667	159.9	109.9	175.22	138.267	84.5667	Wars2	Mm.316754	tryptophanyl tRNA synthetase 2 (mitochondrial)
1415694_at	319.8	300.533	225.8	357.58	520.267	542.367	Wars	Mm.38433	tryptophanyl-tRNA synthetase
1425106_a_at	101.033	102.367	46.7	119.26	239.4	285.133	Wars	Mm.38433	tryptophanyl-tRNA synthetase
1434813_x_at	989.633	1580.9	1209.7	1367.22	2381.03	2994.6	Wars	Mm.38433	tryptophanyl-tRNA synthetase
1437832_x_at	1308.03	1711.53	1320.2	1622.62	2433.07	3053.53	Wars	Mm.38433	tryptophanyl-tRNA synthetase
1434778_at	1579.4	2866.07	2357.1	2002.08	2199.07	3206.73	Wapal	Mm.27957	Wings apart-like homolog (Drosophila)
1434835_at	774.6	2008.47	1805.33	1519.68	1426.23	1986.23	Wapal	Mm.27957	wings apart-like homolog (Drosophila)
1440951_x_at	4.33333	5.96667	12.7	20.02	17.3	18.9	Wapal	Mm.27957	Wings apart-like homolog (Drosophila)
1442426_at	74.5667	78.7	59.6	55.04	107.7	153.533	Wapal	Mm.27957	wings apart-like homolog (Drosophila)
1457320_at	12.2667	15.9333	11.8	21.36	19.4	21.6	Wapal	Mm.27957	Wings apart-like homolog (Drosophila)
1448386_a_at	42.5333	28.8	61.6	26.94	51.3	53.9333	Wap	Mm.268094	whey acidic protein
1437426_at	185.067	277.633	215.133	127.82	233.767	831.467	Wac	Mm.272685	WW domain containing adaptor with coiled-coil
1439249_at	434.633	443	656.767	328.02	341.767	480	Wac	---	WW domain containing adaptor with coiled-coil
1444241_at	337.233	351.333	602.333	296.98	210.367	520.767	Wac	---	WW domain containing adaptor with coiled-coil
1451494_at	2574.7	2707.97	4253.53	2191.46	2427.67	3225.5	Wac	Mm.272685	WW domain containing adaptor with coiled-coil
1451495_at	3097.8	4086.53	5333.7	2001.38	2902.43	3374.17	Wac	Mm.272685	WW domain containing adaptor with coiled-coil
1457559_at	231.833	162.467	192.967	108.56	172.6	460.967	Wac	Mm.272685	WW domain containing adaptor with coiled-coil
1458471_at	37.2	48.1	52.5333	29.82	29.9667	33.1	Wac	Mm.272685	WW domain containing adaptor with coiled-coil
1442439_at	6.96667	6.96667	15.5	14.34	4.83333	11.8667	W91776	---	expressed sequence W91776
1435386_at	608.7	8742.23	6798.37	8793.74	5844.67	31361.5	Vwf	Mm.22339	Von Willebrand factor homolog
1430130_at	5.3	2	7.23333	3.84	5	3.56667	Vwce	Mm.169261	von Willebrand factor C and EGF domains
1441427_at	10.5667	12.8333	8.16667	9.92	22.5333	4.73333	Vwc2	Mm.337851	von Willebrand factor C domain containing 2
1455882_x_at	324.133	23.1333	61.2	32.02	24.9333	41.6333	Vwc2	Mm.337851	von Willebrand factor C domain containing 2
1438567_at	3.8	15.1	29.4667	9	20.4333	23.6	Vwa2	Mm.129534	von Willebrand factor A domain containing 2
1426399_at	647.3	6490.6	5882.97	9447.5	32	62.5	Vwa1	Mm.26515	von Willebrand factor A domain containing 1
1420484_a_at	10658.2	21755.3	1001.47	11805.8	158.033	155.967	Vtn	Mm.3667	vitronectin
1455098_a_at	3979.03	8035.8	245.6	3862.96	40.5	70.7	Vtn	Mm.3667	vitronectin
1449003_a_at	4872.23	6257.4	5801.83	3292.54	5390.37	4999.13	Vti1b	Mm.265929	vesicle transport through interaction with t-SNAREs 1B homolog
1419189_at	134.367	161.267	359.3	137.68	256.067	252.633	Vti1a	Mm.258637	vesicle transport through interaction with t-SNAREs homolog 1A (yeast)
1419190_at	203	246.7	373.433	416.86	300.467	318.3	Vti1a	Mm.258637	vesicle transport through interaction with t-SNAREs homolog 1A (yeast)
1439876_at	55.4667	72.3333	74.4	50.08	44.0333	65.9	Vti1a	Mm.258637	vesicle transport through interaction with t-SNAREs homolog 1A (yeast)
1445374_at	176.167	78.9667	50.8333	41.8	136.833	224.833	Vti1a	Mm.258637	Vesicle transport through interaction with t-SNAREs homolog 1A (yeast)
1446365_at	136.533	91.4667	62.3	41.46	123.3	120.9	Vti1a	Mm.258637	vesicle transport through interaction with t-SNAREs homolog 1A (yeast)
1454077_at	84.8667	99.4333	57.0333	45.48	106.567	65.2667	Vti1a	Mm.258637	vesicle transport through interaction with t-SNAREs homolog 1A (yeast)
1458070_at	9.36667	14.2667	6.43333	7.9	13.9	7.1	Vtcn1	Mm.137467	V-set domain containing T cell activation inhibitor 1
1415722_a_at	2569.43	1752.6	1018.97	2201.26	2571.33	1332.67	Vta1	Mm.227983	Vps20-associated 1 homolog (S. cerevisiae)
1441646_at	196.533	151.333	113.633	121.72	198.5	101.467	Vta1	Mm.227983	Vps20-associated 1 homolog (S. cerevisiae)
1422104_at	5.9	5.46667	7.53333	4.9	5.96667	3.13333	Vsx1	Mm.207061	visual system homeobox 1 homolog (zebrafish)
1450487_at	17.3667	16.3667	20.9	29.06	7.06667	43.1333	Vsx1	Mm.207061	visual system homeobox 1 homolog (zebrafish)
1452065_at	1277.2	2.3	15.8333	27.4	8.96667	21.3	Vstm2	Mm.284015	V-set and transmembrane domain containing 2
1420955_at	4326.47	47.3333	60.3	143.32	6.46667	277.567	Vsnl1	Mm.27005	visinin-like 1
1450055_at	349.033	31.4	21.1333	52.14	25.8667	46.5	Vsnl1	Mm.27005	visinin-like 1
1451651_at	17.9	26.3	39.7	23.34	3553.4	39.5	Vsig4	Mm.26781	V-set and immunoglobulin domain containing 4
1422634_a_at	48.5	1213.87	529.5	315.68	327.333	452.433	Vsig2	Mm.27478	V-set and immunoglobulin domain containing 2
1430553_at	37.9333	23.4	54.1333	38.44	34.6	38.3	Vsig1	Mm.244932	V-set and immunoglobulin domain containing 1
1418121_at	1102	1150.07	949.933	1337.06	1468.67	995.5	Vrk3	Mm.28816	vaccinia related kinase 3
1451929_a_at	53.9	75.8333	16.1	41.48	124.133	61.7	Vrk2	Mm.432040	vaccinia related kinase 2
1453343_s_at	103.867	156.333	136	84.54	243.2	187.2	Vrk2	Mm.432040	vaccinia related kinase 2
1425006_a_at	468.567	614.633	513.267	738.82	497.967	616.533	Vrk1	Mm.2981	vaccinia related kinase 1
1458951_at	242.6	146.667	181.2	150.8	176	151.467	Vrk1	Mm.2981	vaccinia related kinase 1
1434050_at	708.4	538.767	274.767	457.42	1059.07	385.633	Vps8	Mm.235683	vacuolar protein sorting 8 homolog (S. cerevisiae)
1445796_at	156.967	60.3	122.033	76.82	41.4333	123.933	Vps8	Mm.235683	Vacuolar protein sorting 8 homolog (S. cerevisiae)
1454810_s_at	776.267	535	423.7	525.36	915.567	388.3	Vps8	Mm.235683	vacuolar protein sorting 8 homolog (S. cerevisiae)
1418284_at	567	429.133	526.633	1103.2	650.467	474.967	Vps72	Mm.133919	vacuolar protein sorting 72 (yeast)
1418479_at	866.1	1898.13	2395.87	1334.8	1691.2	2302.9	Vps54	Mm.170103	vacuolar protein sorting 54 (yeast)
1438223_at	64.3667	18.3667	6.13333	28.98	34.0333	18.7	Vps54	Mm.170103	Vacuolar protein sorting 54 (yeast)
1439943_at	29.7667	54.1	15.6667	25.58	39.8667	64.9667	Vps54	Mm.170103	vacuolar protein sorting 54 (yeast)
1449095_at	1037.43	2640.17	2259.93	1379.9	1659.97	2126.3	Vps54	Mm.170103	vacuolar protein sorting 54 (yeast)
1456810_at	48.2333	58.9	52.2667	27.44	38.9333	119.6	Vps54	Mm.170103	vacuolar protein sorting 54 (yeast)
1416989_at	1180.7	1022.93	1002.63	1238.12	1026.23	1003.83	Vps53	Mm.46397	vacuolar protein sorting 53 (yeast)
1436327_a_at	93.9	55.8	51.9	98.64	45.3667	68.5333	Vps53	Mm.46397	vacuolar protein sorting 53 (yeast)
1455644_at	425.733	423	499.133	430.32	330.9	328.167	Vps53	Mm.46397	vacuolar protein sorting 53 (yeast)
1417007_a_at	5973.63	9288.3	9983.67	5936.78	8699	8959.63	Vps4b	Mm.18705	vacuolar protein sorting 4b (yeast)
1457067_at	111.3	170.567	235.367	100.76	146.433	206.633	Vps4b	Mm.18705	Vacuolar protein sorting 4b (yeast)
1460104_at	81	77.4333	181.567	57.06	117.2	123.033	Vps4b	Mm.18705	vacuolar protein sorting 4b (yeast)
1417510_at	1674.2	1935.53	1740.9	1629.88	1758.77	1148.6	Vps4a	Mm.236004	vacuolar protein sorting 4a (yeast)
1418143_at	476.4	345.5	267.8	372.12	590.633	233.667	Vps45	Mm.263185	vacuolar protein sorting 45 (yeast)
1433665_at	1100	928.5	722.967	773.46	841.833	606.567	Vps41	Mm.27389	vacuolar protein sorting 41 (yeast)
1433666_s_at	2173.4	1177.37	1168.5	1101.74	1265	927.767	Vps41	Mm.27389	vacuolar protein sorting 41 (yeast)
1437901_a_at	1306.83	615.1	580.733	229	503	485.233	Vps41	Mm.27389	vacuolar protein sorting 41 (yeast)
1425474_a_at	136.467	116.7	67.1333	85.78	198.933	93.1	Vps39	Mm.246131	vacuolar protein sorting 39 (yeast)
1451720_at	1412	1011.03	1182.07	692.94	1459.73	920.767	Vps39	Mm.246131	vacuolar protein sorting 39 (yeast)
1457736_at	427.6	68.7667	90.9	101.38	80.1	93.7667	Vps37d	Mm.44356	vacuolar protein sorting 37D (yeast)
1426227_s_at	541.967	370.733	326.5	497.24	657.667	450	Vps37c	Mm.19091	vacuolar protein sorting 37C (yeast)
1437615_s_at	1598.73	1514.2	2802.43	893.66	1603.47	2070.2	Vps37c	Mm.19091	Vacuolar protein sorting 37C (yeast)
1424380_at	1065.33	911.8	736.5	960.98	867.567	275	Vps37b	Mm.4079	vacuolar protein sorting 37B (yeast)
1419176_at	186.8	165.1	195.3	105.72	112.433	112.4	Vps37a	Mm.294871	vacuolar protein sorting 37A (yeast)
1419177_at	1468.13	1374.1	1320.6	955.68	526.833	683.867	Vps37a	Mm.294871	vacuolar protein sorting 37A (yeast)
1429363_at	338.667	361.333	198.067	238.22	188.6	262.533	Vps37a	Mm.294871	vacuolar protein sorting 37A (yeast)
1451343_at	564.8	1619.2	1525.5	1008.7	866.867	1023.27	Vps36	Mm.41453	vacuolar protein sorting 36 (yeast)
1415783_at	5575.63	4085.43	3016.47	3842.46	4724.63	4195.33	Vps35	Mm.296520	vacuolar protein sorting 35
1415784_at	175.167	117	145	78.58	73.7	88.1667	Vps35	Mm.296520	vacuolar protein sorting 35
1427933_at	339.567	294.967	364.8	268.18	367.8	312.033	Vps33b	Mm.322870	vacuolar protein sorting 33B (yeast)
1434816_at	1019.33	705.867	680.333	604.54	952.467	469.367	Vps33a	Mm.41372	vacuolar protein sorting 33A (yeast)
1443913_at	94.9333	118.967	86.8	49.58	76.9333	104.767	Vps33a	Mm.41372	Vacuolar protein sorting 33A (yeast)
1453742_at	114.967	94.0667	51.3333	100.86	141.433	59.5	Vps33a	Mm.41372	vacuolar protein sorting 33A (yeast)
1459001_at	169.367	72.5667	86.2	30.84	51.5	91.3667	Vps33a	Mm.41372	Vacuolar protein sorting 33A (yeast)
1417659_at	1772.83	907.3	1021.63	1286.46	1611.97	906.733	Vps29	Mm.216528	vacuolar protein sorting 29 (S. pombe)
1417660_s_at	5659.2	5948.1	4962.6	5137.06	7333.9	4725.13	Vps29	Mm.216528	vacuolar protein sorting 29 (S. pombe)
1440641_at	89.5667	61.5667	51.7	43.34	78.7667	105.533	Vps29	Mm.216528	vacuolar protein sorting 29 (S. pombe)
1455302_at	16.6333	18.2	6.8	19.48	21.2	3.7	Vps29	Mm.216528	vacuolar protein sorting 29 (S. pombe)
1448447_at	4842.97	3832.27	3202.93	4599.92	3981.33	2605.37	Vps28	Mm.30028	vacuolar protein sorting 28 (yeast)
1428246_at	1027.4	577.4	612.433	590.72	445.1	384.933	Vps26b	Mm.218717	vacuolar protein sorting 26 homolog B (yeast)
1428247_at	482.3	663.8	504.433	926.82	504.1	400.7	Vps26b	Mm.218717	vacuolar protein sorting 26 homolog B (yeast)
1453762_at	87.5	115.233	70.5	177.4	137.467	101.133	Vps26b	Mm.218717	vacuolar protein sorting 26 homolog B (yeast)
1420495_a_at	2633.9	2058.73	1846.67	1261.16	3090.5	2572.93	Vps26a	Mm.260703	vacuolar protein sorting 26 homolog A (yeast)
1421050_at	116.8	89.2	113.833	85.34	81.4333	79.4	Vps25	Mm.301020	vacuolar protein sorting 25 (yeast)
1421051_s_at	295.767	247.1	196.967	501.98	373.967	264.767	Vps25	Mm.301020	vacuolar protein sorting 25 (yeast)
1428621_a_at	771.367	821.533	819.5	1388.32	1334.87	969.1	Vps25	Mm.301020	vacuolar protein sorting 25 (yeast)
1428165_at	631.967	1106.3	1135.13	668.1	802.567	652.033	Vps24	Mm.181278	vacuolar protein sorting 24 (yeast)
1447062_at	103.433	90	46.0667	29.6	86.7667	132.733	Vps24	Mm.181278	Vacuolar protein sorting 24 (yeast)
1453564_a_at	158.533	568.167	474.567	454.3	366	235.033	Vps24	Mm.181278	vacuolar protein sorting 24 (yeast)
1459584_at	22.5	8.53333	10.8	3.74	17.0333	3.4	Vps24	Mm.181278	vacuolar protein sorting 24 (yeast)
1427304_at	354.4	259.433	265.133	316.5	336.1	161.7	Vps18	Mm.294761	vacuolar protein sorting 18 (yeast)
1442112_at	102.1	121.567	91.0667	54.02	84.6	61.3333	Vps18	Mm.294761	vacuolar protein sorting 18 (yeast)
1455873_a_at	206.567	171.633	165.467	202.8	246.4	170.933	Vps18	Mm.294761	vacuolar protein sorting 18 (yeast)
1416254_a_at	916	852.833	514.833	1029.12	1251.03	760.667	Vps16	Mm.276092	vacuolar protein sorting 16 (yeast)
1436331_at	314.8	512.667	488.4	364.08	368.967	377.4	Vps13d	Mm.431917	vacuolar protein sorting 13 D (yeast)
1439187_at	964.9	1713.93	1441.63	1132.9	1325.93	1644.87	Vps13d	---	vacuolar protein sorting 13 D (yeast)
1446855_at	127.5	146.8	103.5	88.46	58.5333	202.1	Vps13d	---	vacuolar protein sorting 13 D (yeast)
1458195_at	6.53333	12.5333	13.3	6.8	6.5	5.23333	Vps13d	---	vacuolar protein sorting 13 D (yeast)
1456535_at	482.8	36.4667	47.4667	31.9	35.3667	75.8667	Vps13c	Mm.241454	vacuolar protein sorting 13C (yeast)
1430801_at	103.9	90.9667	103.3	51.92	65.2	152.867	Vps13b	Mm.309250	vacuolar protein sorting 13B (yeast)
1434571_at	1177.27	1234.27	920.667	808.46	1015.53	1333.17	Vps13b	Mm.309250	vacuolar protein sorting 13B (yeast)
1443283_at	9.5	13.4667	27.2667	7.08	5.46667	8.53333	Vps13b	Mm.309250	Vacuolar protein sorting 13B (yeast)
1443489_at	88.6	70.3333	53.9333	41.16	79.1667	111.5	Vps13b	Mm.309250	Vacuolar protein sorting 13B (yeast)
1444435_at	10.2667	21.7333	32.9667	17.9	40.1	26.2	Vps13b	Mm.309250	vacuolar protein sorting 13B (yeast)
1446587_at	58.3333	37.0333	72.2667	27.26	37.8	41.9333	Vps13b	Mm.309250	Vacuolar protein sorting 13B (yeast)
1431327_at	52.2667	40.8	29.3667	14.24	25.4	50.1667	Vps13a	Mm.211963	vacuolar protein sorting 13A (yeast)
1440146_at	90.3	137.4	85.6333	77.92	50.8333	96.9	Vps13a	Mm.211963	vacuolar protein sorting 13A (yeast)
1440482_at	107.533	141.2	112	62.66	72.8333	82.6	Vps13a	Mm.211963	vacuolar protein sorting 13A (yeast)
1456592_at	10.3667	2.9	23.7667	14.08	3.53333	18.1667	Vps13a	Mm.211963	Vacuolar protein sorting 13A (yeast)
1457674_at	307	449.767	478.233	278.58	394.033	387.8	Vps13a	Mm.211963	vacuolar protein sorting 13A (yeast)
1428109_at	792.867	851.033	440.733	759.94	975.1	693.833	Vps11	Mm.295013	vacuolar protein sorting 11 (yeast)
1428110_x_at	757.4	840.2	487.033	735.38	860.433	678.3	Vps11	Mm.295013	vacuolar protein sorting 11 (yeast)
1441922_x_at	338.267	230.267	338.8	112.22	214.233	148.8	Vps11	Mm.295013	vacuolar protein sorting 11 (yeast)
1452489_at	10.2	11.9667	10.5333	11.3	10.5333	17.2	Vps11	Mm.295013	vacuolar protein sorting 11 (yeast)
1422921_at	51.6	60.7	81.8	70.36	73.9333	60.6667	Vpreb3	Mm.333851	pre-B lymphocyte gene 3
1422416_s_at	15.3	40.6333	40.8333	30.7	19.6667	16.9333	Vpreb1 /// Vpreb2	Mm.57574	pre-B lymphocyte gene 1 /// pre-B lymphocyte gene 2
1449869_at	4.73333	11.0333	31.6333	26.24	35.8	22.2	Vpreb1	Mm.57574	pre-B lymphocyte gene 1
1434609_at	775.933	1330.67	1184.97	853.04	1000.7	928.833	Vprbp	Mm.436700	Vpr (HIV-1) binding protein
1455764_at	24.8	36.9	8.8	25.12	13.3667	40	Vprbp	Mm.436700	Vpr (HIV-1) binding protein
1420723_at	16.5	15.8333	7.13333	16.76	16.6333	36.8333	Vnn3	Mm.27334	vanin 3
1418486_at	229.133	22.0333	33.6	43.82	38	90.7	Vnn1	Mm.27154	vanin 1
1447845_s_at	72.6667	1.33333	2.4	6.52	5.53333	12.2	Vnn1	Mm.27154	vanin 1
1417900_a_at	1296.03	8.6	8.43333	36.08	12.6	242.733	Vldlr	Mm.4141	very low density lipoprotein receptor
1434465_x_at	4521.37	42.7667	61.4667	97.6	44.9333	1095.17	Vldlr	Mm.4141	very low density lipoprotein receptor
1435893_at	1592.63	6.23333	23.8667	30.16	27.1667	175.7	Vldlr	Mm.393599	very low density lipoprotein receptor
1438258_at	1099.97	19.7	30.0667	33.14	7.4	123	Vldlr	Mm.393599	very low density lipoprotein receptor
1442169_at	163.067	21.6	28.4333	16.84	15.4667	85.6333	Vldlr	Mm.4141	very low density lipoprotein receptor
1451156_s_at	49.8	5.66667	9.2	18.68	46.4667	43.4	Vldlr	Mm.4141	very low density lipoprotein receptor
1429092_at	261.3	405.467	507.833	464.68	224.933	402.1	Vkorc1l1	Mm.288718	vitamin K epoxide reductase complex, subunit 1-like 1
1434916_at	403	373.333	410.7	260.02	308.167	301.4	Vkorc1l1	Mm.288718	vitamin K epoxide reductase complex, subunit 1-like 1
1452770_at	4625.1	2907.17	3058.17	3063.84	3040.4	2833.27	Vkorc1	Mm.29703	vitamin K epoxide reductase complex, subunit 1
1426231_at	50.6	13.9333	10.8	22.12	10.7	28.0667	Vit	Mm.292983	vitrin
1421391_at	29.6	32.7667	39.3667	10.1	57.6	59.5333	Vipr2	Mm.123425	vasoactive intestinal peptide receptor 2
1423004_at	6.6	3.33333	3.43333	6.96	17.3667	4.26667	Vipr1	Mm.282007	vasoactive intestinal peptide receptor 1
1428664_at	4847.97	31.1	71.0333	43.42	35.8667	62.8	Vip	Mm.98916	vasoactive intestinal polypeptide
1438118_x_at	4722.07	22126.6	22043.5	17197.4	9517.97	31478.4	Vim	Mm.268000	vimentin
1450641_at	4168.8	20354.4	17741.7	22948.9	7640.57	33392.8	Vim	Mm.268000	vimentin
1456292_a_at	2372.33	13764	13274.3	11248.1	5047.83	24644	Vim	Mm.268000	vimentin
1426022_a_at	84.5	65.2	83.9333	49.42	77.3667	59.2	Vill	Mm.83817	villin-like
1450850_at	1760.47	913.767	890.667	620.14	1066.27	2658.23	Vil2	Mm.277812	villin 2
1456725_x_at	609.2	356.9	1087.23	456.02	376.367	738.967	Vil2	Mm.277812	villin 2
1448837_at	18.5333	535.167	459.367	163.62	10.5333	39.9333	Vil1	---	villin 1
1421071_at	88.3	83.9333	66.6333	75.14	87.3	66.9	Vhlh	Mm.29407	von Hippel-Lindau syndrome homolog
1434708_at	1175.63	596.4	414.367	649.52	461.733	417.1	Vhlh	Mm.29407	von Hippel-Lindau syndrome homolog
1445514_at	218.267	110.933	114.533	80.22	108.433	186.3	Vhlh	Mm.29407	von Hippel-Lindau syndrome homolog
1455992_at	1686.33	1811.37	1855.77	2781.32	2214.5	2760.6	Vgll4	---	vestigial like 4 (Drosophila)
1430596_s_at	77.5333	36.4667	17.9667	20.74	23.4667	540.667	Vgll3	Mm.25670	vestigial like 3 (Drosophila)
1453593_at	53.1667	26.2667	20.3667	17.98	3.73333	450.267	Vgll3	Mm.25670	vestigial like 3 (Drosophila)
1455299_at	79.4333	54.2333	42.3667	21.42	21.9667	526.667	Vgll3	Mm.392787	vestigial like 3 (Drosophila)
1436361_at	25.8667	98.8	73.0333	79.6	54.8333	69.1	Vgll2	Mm.87237	vestigial like 2 homolog (Drosophila)
1421607_at	12.7333	4.33333	20.2667	4.34	6.8	14.0667	Vgll1	Mm.190616	vestigial like 1 homolog (Drosophila)
1436094_at	809.1	6.66667	9	48.1	11.5667	4.46667	Vgf	Mm.389697	VGF nerve growth factor inducible
1438197_at	185.933	152.5	118.067	290.64	451.867	149.167	Vezt	Mm.256845	vezatin, adherens junctions transmembrane protein
1438881_at	1.63333	8.9	6.9	12.16	19.1333	9.33333	Vezt	Mm.256845	vezatin, adherens junctions transmembrane protein
1445513_at	32.1667	23.5333	36.1	27.24	29.6333	32.4	Vezt	Mm.256845	Vezatin, adherens junctions transmembrane protein
1429084_at	413.733	562.2	347.267	228.58	604.2	595.267	Vezf1	Mm.46628	vascular endothelial zinc finger 1
1429085_at	3715.23	5117.73	5376.77	3282.78	4942.3	8188.83	Vezf1	Mm.46628	vascular endothelial zinc finger 1
1444663_at	71.3	50.9333	37.2	55.74	64.8333	88.6667	Vezf1	Mm.46628	Vascular endothelial zinc finger 1
1432088_at	42.8333	23.5667	14.8	23.52	6.93333	17.0667	Veph1	Mm.276776	ventricular zone expressed PH domain homolog 1 (zebrafish)
1419417_at	141.933	1640.67	1448.9	1255.84	357.467	6477.47	Vegfc	Mm.1402	vascular endothelial growth factor C
1439766_x_at	294.4	2371.2	3527.3	1201.88	515.867	8840.4	Vegfc	Mm.1402	vascular endothelial growth factor C
1440739_at	197.1	1795.8	2290.9	1075.3	522.733	7206.23	Vegfc	Mm.1402	vascular endothelial growth factor C
1451803_a_at	534.9	172.033	159.533	180.14	495.733	163.1	Vegfb	Mm.15607	vascular endothelial growth factor B
1420909_at	698.633	33.7333	44.1667	66.6	172.067	3120.33	Vegfa	Mm.282184	vascular endothelial growth factor A
1451959_a_at	97.6667	7.73333	18.8	32.98	20.9333	422.3	Vegfa	Mm.282184	vascular endothelial growth factor A
1418175_at	30.9	42.8667	16.1	20.28	14.3333	170.033	Vdr	Mm.245084	vitamin D receptor
1418176_at	38.5667	24.0667	8.8	13.08	8.63333	260.267	Vdr	Mm.245084	vitamin D receptor
1424274_at	1163.27	1545.7	1079.1	1154.18	1471.9	1897.73	Vdp	Mm.15868	vesicle docking protein
1416175_a_at	7695.2	8011.6	9038.43	7458.52	6452.7	6068.57	Vdac3	Mm.227704	voltage-dependent anion channel 3
1415990_at	8811.93	9659.87	9072.13	13479.6	10200.5	8186.77	Vdac2	Mm.262327	voltage-dependent anion channel 2
1415998_at	1909.5	1009.23	799.067	2712.94	1124.83	466.6	Vdac1	Mm.3555	voltage-dependent anion channel 1
1436992_x_at	8809.8	7008.03	6237.23	10161.7	6358.47	4744.73	Vdac1	Mm.3555	voltage-dependent anion channel 1
1437192_x_at	3972.1	2888.43	1333.93	7245.34	2806.83	1238.77	Vdac1	Mm.3555	voltage-dependent anion channel 1
1437452_x_at	17	15.3667	17.0667	15.92	22.8667	23.6333	Vdac1	Mm.3555	voltage-dependent anion channel 1
1437947_x_at	2688.03	1468.5	960.367	3120.4	1476.9	767.633	Vdac1	Mm.3555	voltage-dependent anion channel 1
1434706_at	885.867	754.9	839.833	448.98	1689.17	724.733	Vcpip1	Mm.274493	valosin containing protein (p97)/p47 complex interacting protein 1
1442251_at	53.9667	52.8333	73.3667	24.38	125.6	98.1333	Vcpip1	Mm.274493	valosin containing protein (p97)/p47 complex interacting protein 1
1456607_at	584.333	475.967	433.1	215.96	687.133	348.333	Vcpip1	Mm.274493	valosin containing protein (p97)/p47 complex interacting protein 1
1459849_x_at	7.36667	14.6667	13.2667	8.62	17.8333	11.2333	Vcpip1	Mm.274493	valosin containing protein (p97)/p47 complex interacting protein 1
1416156_at	3900.73	12964.7	12048.8	10370.5	9008.77	20097.9	Vcl	Mm.279361	vinculin
1416157_at	43.2333	42.9	57.5333	91.58	54.1667	62.7667	Vcl	Mm.279361	vinculin
1421694_a_at	246.6	29.0333	5.53333	19.46	35.0333	78.4333	Vcan	Mm.158700	versican
1427256_at	2370.2	9.3	50.9	53.56	14.8667	270.533	Vcan	Mm.158700	versican
1427257_at	148.1	4.93333	14.7333	7.64	4.66667	8.83333	Vcan	Mm.158700	versican
1433043_at	17.3333	26.9	24.1333	8.92	56.8667	47.4333	Vcan	---	versican
1433044_at	29.3	13.7	24.5	22.34	21.9667	17.8667	Vcan	Mm.410783	versican
1447586_at	6.46667	3.46667	4.36667	4.56	4.6	3.1	Vcan	Mm.158700	versican
1447887_x_at	6.66667	1.93333	9.36667	6.64	7.6	3.53333	Vcan	Mm.158700	versican
1459767_x_at	16.5667	7.43333	5.8	9.02	15.2	18.6667	Vcan	Mm.158700	versican
1415989_at	444.833	263.333	293.167	159.6	906.067	1081.03	Vcam1	Mm.76649	vascular cell adhesion molecule 1
1436003_at	46	81.8333	105.6	27.68	92.2333	332.6	Vcam1	Mm.76649	vascular cell adhesion molecule 1
1448162_at	3304.83	1385.27	2730.67	551.82	5356.3	9565.8	Vcam1	Mm.76649	vascular cell adhesion molecule 1
1451314_a_at	129.767	253.333	300.067	77	472.8	1271.8	Vcam1	Mm.76649	vascular cell adhesion molecule 1
1421750_a_at	8568.73	6436.97	5376.87	6658.44	4540.23	5152.37	Vbp1	Mm.8294	von Hippel-Lindau binding protein 1
1443232_at	7.1	7.86667	14.9	10.32	13.2333	10.3667	Vax2os1	Mm.185937	Vax2 opposite strand transcript 1
1446754_a_at	8.8	7.53333	6.43333	7.68	7.93333	11.3667	Vax2os1	Mm.185937	Vax2 opposite strand transcript 1
1445218_at	27.7333	7.53333	36.0667	23.84	22.8667	18.3	Vax2	Mm.307165	Ventral anterior homeobox containing gene 2
1450303_at	10	18	12	15.76	12.8333	36.8333	Vax2	Mm.307165	ventral anterior homeobox containing gene 2
1421774_at	40.1	11.9	6.43333	8.52	14.5667	3.2	Vax1	Mm.23801	ventral anterior homeobox containing gene 1
1417122_at	117.7	15.8	25.7333	129.8	1740.4	1293.77	Vav3	Mm.282257	vav 3 oncogene
1417123_at	36.8	26.2	42.2333	33.56	122.1	56.2667	Vav3	Mm.282257	vav 3 oncogene
1446795_at	23.7333	7.33333	30.6333	9.06	19.3667	11.4	Vav3	Mm.282257	Vav 3 oncogene
1448600_s_at	183.967	43.7	23.7667	245.56	2268.87	1332.6	Vav3	Mm.282257	vav 3 oncogene
1458630_at	49.2667	14.5333	27.9333	16.94	58.5333	119.633	Vav3	Mm.282257	Vav 3 oncogene
1421272_at	7.26667	5.3	6.53333	7.2	8.36667	7.06667	Vav2	Mm.179011	vav 2 oncogene
1435065_x_at	60.1	108.733	139.4	88.8	111.567	144.5	Vav2	Mm.179011	Vav 2 oncogene
1435244_at	245.833	83.5	74.2667	212.16	399.367	220.733	Vav2	Mm.179011	vav 2 oncogene
1458758_at	21.6	49.6333	34.5	34.36	56.2333	17.1	Vav2	Mm.179011	Vav 2 oncogene
1422932_a_at	323.867	3.56667	10.9	12.22	65.0333	80.7333	Vav1	Mm.248172	vav 1 oncogene
1423726_at	203.567	642.1	772.967	804.98	570.2	421.433	Vat1	Mm.29210	vesicle amine transport protein 1 homolog (T californica)
1438165_x_at	340.9	1222.67	1835.23	1437.46	922.8	1066.7	Vat1	Mm.29210	vesicle amine transport protein 1 homolog (T californica)
1441930_x_at	1745.43	3839.2	7670.7	2992.08	2676.17	3342.5	Vat1	Mm.29210	Vesicle amine transport protein 1 homolog (T californica)
1451097_at	718.1	1158.93	744.533	3347.68	1261.07	734.1	Vasp	Mm.9684	vasodilator-stimulated phosphoprotein
1427894_at	337.633	302.967	229.367	548.72	128.067	741.6	Vasn	Mm.248337	vasorin
1455812_x_at	1241.73	1336.77	1714.4	1281.9	194.467	4429.1	Vasn	Mm.248337	vasorin
1451105_at	111.533	45.1	24.4	74.72	24.6667	50.8	Vash2	Mm.22856	vasohibin 2
1435195_at	1833.97	1749.4	1981.5	8966.28	2351.2	1261.57	Vash1	Mm.216101	vasohibin 1
1445143_at	164.067	123.8	84.9	375.44	504.233	280.033	Vash1	Mm.216101	vasohibin 1
1434349_at	154.467	101.467	126.433	89.12	127.033	89.2	Vars2	Mm.32002	valyl-tRNA synthetase 2, mitochondrial (putative)
1454936_at	96.4333	43.2667	39.4	149.76	127.3	65.8	Vars2	Mm.32002	valyl-tRNA synthetase 2, mitochondrial (putative)
1448472_at	399.767	206.967	188.1	434.5	377.033	304.033	Vars	Mm.28420	valyl-tRNA synthetase
1423152_at	309.833	394.9	348.933	497.58	926.567	252.067	Vapb	Mm.260456	vesicle-associated membrane protein, associated protein B and C
1436079_s_at	855.933	540.167	659.167	387.54	728.933	426.4	Vapb	Mm.260456	vesicle-associated membrane protein, associated protein B and C
1445370_at	67.5	48.9	50.7	33.5	67.7667	38.9667	Vapb	Mm.260456	Vesicle-associated membrane protein, associated protein B and C
1458501_at	618.033	270	418.3	142.7	229.767	285.9	Vapb	Mm.260456	vesicle-associated membrane protein, associated protein B and C
1416465_a_at	8384.53	7597.4	10736.9	5614.32	6063.67	7920.9	Vapa	Mm.391032	vesicle-associated membrane protein, associated protein A
1416466_at	3226.23	2469.43	2464.07	2440.4	2398.7	2941.3	Vapa	Mm.391032	vesicle-associated membrane protein, associated protein A
1448349_at	52.0667	36.4	57.3333	24.4	41.3	32.1333	Vapa	Mm.391032	vesicle-associated membrane protein, associated protein A
1419218_at	183.6	152.1	171	242.74	158	166.867	Vangl2	Mm.36148	vang-like 2 (van gogh, Drosophila)
1436118_at	392.8	456.233	425.7	626.32	339.933	225	Vangl2	Mm.392110	vang-like 2 (van gogh, Drosophila)
1455592_at	181.7	148.433	155.667	236.76	136.567	88.5667	Vangl2	Mm.36148	vang-like 2 (van gogh, Drosophila)
1427234_at	323.6	902.367	818.933	699.58	999.833	662.367	Vangl1	Mm.331266	vang-like 1 (van gogh, Drosophila)
1420624_a_at	871.2	2446.6	2299.47	2386.5	2375.23	2116.93	Vamp8	Mm.1838	vesicle-associated membrane protein 8
1430522_a_at	307.633	2422.63	1793.77	2103.02	8476.3	918.233	Vamp5	Mm.42184	vesicle-associated membrane protein 5
1449993_at	23.1333	117.833	102.667	53.62	211.7	74.4	Vamp5	Mm.42184	vesicle-associated membrane protein 5
1422895_at	2573.1	3907.7	4585.47	2404.58	2327.53	1962.27	Vamp4	Mm.10699	vesicle-associated membrane protein 4
1434796_at	2194.47	1529.83	1831.97	642.14	701.833	699.333	Vamp4	Mm.10699	vesicle-associated membrane protein 4
1421102_a_at	105.033	196.767	213.933	194.52	187.1	117.633	Vamp3	Mm.273930	vesicle-associated membrane protein 3
1433693_x_at	236.9	273.233	301	290.58	297.033	207.067	Vamp3	Mm.273930	vesicle-associated membrane protein 3
1433916_at	2610.5	5628.1	5052.03	5417.7	4603.43	3015.03	Vamp3	Mm.273930	vesicle-associated membrane protein 3
1437708_x_at	5791.1	10104.3	19103.3	6825.18	6074.13	7084.17	Vamp3	Mm.273930	vesicle-associated membrane protein 3
1456245_x_at	7320.63	14258.1	22799.3	10767.9	9458.4	8791.57	Vamp3	Mm.273930	vesicle-associated membrane protein 3
1457391_at	21.4667	24.3667	26.4	19.58	31.1	10.4667	Vamp3	Mm.273930	Vesicle-associated membrane protein 3
1420833_at	175.367	56.2667	72.4	35.04	41.0667	53.3667	Vamp2	Mm.28643	vesicle-associated membrane protein 2
1420834_at	2628.23	805.967	888.3	576.98	689.267	598.167	Vamp2	Mm.28643	vesicle-associated membrane protein 2
1421862_a_at	20.9	10.3	24.1	13.24	56.3667	17.6667	Vamp1	Mm.32321	vesicle-associated membrane protein 1
1421863_at	291.467	42.1667	78.0667	35.74	48.9667	105.633	Vamp1	Mm.32321	vesicle-associated membrane protein 1
1416231_at	191.333	171.4	162.4	271.54	284.3	229.667	Vac14	Mm.274894	Vac14 homolog (S. cerevisiae)
1450338_x_at	5.46667	8.63333	8.5	6.8	9.16667	6.9	V2r8 /// V2r9	---	vomeronasal 2, receptor, 8 /// vomeronasal 2, receptor, 9
1427681_s_at	7.96667	2.66667	5.33333	2.02	3.76667	3	V2r3	---	vomeronasal 2, receptor, 3
1421701_at	18.0667	6.56667	28.9333	22.64	13.9667	40.6667	V2r16	Mm.261598	vomeronasal 2, receptor, 16
1421764_at	13.3	10.1333	7.1	16.14	25.0333	33.0667	V1rd9	Mm.379267	vomeronasal 1 receptor, D9
1421724_at	10.5333	16.7	27.2	16.66	22.8333	22.6	V1rd7	Mm.160377	vomeronasal 1 receptor, D7
1421716_at	51.7333	46.7333	63.3333	48.34	71.3667	49	V1rd6	Mm.160378	vomeronasal 1 receptor, D6
1421717_at	4.8	22.3667	18.9333	8.68	6.7	6.83333	V1rd4	Mm.261621	vomeronasal 1 receptor, D4
1421736_at	5.66667	13.0667	18.5	13.7	10.6667	8.73333	V1rd3	Mm.160380	vomeronasal 1 receptor, D3
1460301_at	8.23333	14.4333	2.9	30.8	15.1667	19.6	V1rd2	Mm.160381	vomeronasal 1 receptor, D2
1450315_at	54.0667	50.3333	52.8	53.06	59.7333	40.4	V1rd14	Mm.160376	vomeronasal 1 receptor, D14
1450343_at	16.4	27.7333	25.3	23.82	9.43333	14.6333	V1rd1	Mm.160382	vomeronasal 1 receptor, D1
1422388_at	10.3667	10.6333	22.0667	19.2	43.4333	13.9333	V1rc8	Mm.431972	vomeronasal 1 receptor, C8
1450602_at	2.46667	13.1667	19.0333	6.32	11.0667	19.4333	V1rc7	Mm.431974	vomeronasal 1 receptor, C7
1422392_at	8.7	21.9333	9.1	11.1	19.7	9.93333	V1rc6	Mm.377160	vomeronasal 1 receptor, C6
1422390_at	20.0333	11.3	13.4333	13.58	7.46667	11.7333	V1rc5	Mm.431976	vomeronasal 1 receptor, C5
1422391_at	4.13333	3.2	5.73333	5.12	7.03333	6.46667	V1rc3	Mm.377157	vomeronasal 1 receptor, C3
1422395_at	4.03333	1.26667	1.36667	6.48	3.1	2.73333	V1rc22 /// V1rc8	Mm.389764	vomeronasal 1 receptor, C8 /// vomeronasal 1 receptor, C22
1422387_at	13	6.53333	4.76667	10.2	10.7333	6.4	V1rc2	Mm.377156	vomeronasal 1 receptor, C2
1450595_at	20.2333	10.3667	9.9	12.2	33.8	30.4667	V1rc1	Mm.436285	vomeronasal 1 receptor, C1
1422379_x_at	5.43333	11.4667	4	4.12	4	3.56667	V1rb9	Mm.377154	vomeronasal 1 receptor, B9
1450601_at	4.63333	10.0667	3.2	4.74	4.1	2.2	V1rb8	Mm.377153	vomeronasal 1 receptor, B8
1422378_at	12.5333	9.36667	28.6333	6.7	13.9667	22.9333	V1rb7	Mm.377152	vomeronasal 1 receptor, B7
1422383_at	6.56667	18.7667	8.6	13.7	28.5	5.36667	V1rb6	Mm.423723	vomeronasal 1 receptor, B6
1422380_at	5.33333	20.4333	13.2667	10.78	10.4333	8.26667	V1rb5	---	vomeronasal 1 receptor, B5
1422377_at	120.9	137.467	18.5333	59.46	151.833	59.5333	V1rb4	Mm.377151	vomeronasal 1 receptor, B4
1450599_at	28.6667	12.5667	3.7	9.66	14	8	V1rb3	Mm.434332	vomeronasal 1 receptor, B3
1421778_at	2.66667	4.36667	2.2	3.8	1.53333	20.2333	V1rb2	Mm.89985	vomeronasal 1, receptor B2
1422356_at	1	1.66667	1.33333	1.84	2.2	1.63333	V1rb10 /// V1rb9	Mm.377154	vomeronasal 1 receptor, B9 /// vomeronasal 1 receptor, B10
1422376_at	8.73333	9.7	9.6	16.24	6.93333	1.73333	V1rb1	Mm.377149	vomeronasal 1 receptor, B1
1422366_at	34.8	36.3667	59.1	43.98	15.7	48.6333	V1ra9	Mm.377148	vomeronasal 1 receptor, A9
1422369_at	27.4333	27.6667	21.3667	26.08	2.66667	11.9333	V1ra6	Mm.349358	vomeronasal 1 receptor, A6
1422368_at	12.5333	1.53333	17.6333	17.54	11	10.2333	V1ra5	Mm.431989	vomeronasal 1 receptor, A5
1450598_at	7.36667	8.36667	27.9667	5.22	16.1	29.1333	V1ra4	Mm.377143	vomeronasal 1 receptor, A4
1450603_s_at	6.7	4.2	2.46667	3.32	28	7	V1ra3 /// V1ra4	Mm.425336	vomeronasal 1 receptor, A3 /// vomeronasal 1 receptor, A4
1427675_at	1.23333	2.16667	19.0333	5.92	5.03333	14.0667	V1ra2	Mm.431981	vomeronasal 1 receptor, A2
1450558_at	9.73333	15.3333	4.86667	4.92	19.9	16.7667	V1ra1	Mm.20471	vomeronasal 1 receptor, A1
1418986_a_at	428.667	378.7	346.167	899.92	637.167	488.333	Uxt	Mm.34779	ubiquitously expressed transcript
1426275_a_at	246.067	344.367	401.767	604.38	405.633	391.867	Uxs1	Mm.387202	UDP-glucuronate decarboxylase 1
1452011_a_at	919.967	1073.8	1102.33	768.18	1144.93	811.633	Uxs1	Mm.387202	UDP-glucuronate decarboxylase 1
1454706_at	969.667	2636.27	2408.83	2543.12	3474.3	3069.8	Uvrag	Mm.323072	UV radiation resistance associated gene
1422247_a_at	24.8	93.5667	65.1333	59.68	94.4667	63.8333	Uty	Mm.20477	ubiquitously transcribed tetratricopeptide repeat gene, Y chromosome
1426598_at	41.8667	176.433	165.567	84.98	166.8	171.833	Uty	Mm.20477	ubiquitously transcribed tetratricopeptide repeat gene, Y chromosome
1457582_at	11.7667	19.1	29	18.98	13.9333	15.1333	Uty	Mm.20477	Ubiquitously transcribed tetratricopeptide repeat gene, Y chromosome
1459565_at	45.7	65.7667	26.2	34.96	41.6667	87.5333	Uty	Mm.20477	ubiquitously transcribed tetratricopeptide repeat gene, Y chromosome
1427235_at	994.767	1026.43	931.1	830.78	730.133	933.533	Utx	Mm.257498	ubiquitously transcribed tetratricopeptide repeat gene, X chromosome
1427672_a_at	1435.5	2151.7	1943.8	1569.98	692.767	1398.1	Utx	Mm.257498	ubiquitously transcribed tetratricopeptide repeat gene, X chromosome
1440524_at	6.73333	6.16667	8.5	7.16	6.36667	7	Utx	Mm.257498	ubiquitously transcribed tetratricopeptide repeat gene, X chromosome
1441201_at	1.96667	22.1667	17.6	16.12	31.8333	8.33333	Utx	Mm.257498	Ubiquitously transcribed tetratricopeptide repeat gene, X chromosome
1445198_at	87	126.167	161.933	59.08	56.2667	166.9	Utx	Mm.417709	ubiquitously transcribed tetratricopeptide repeat gene, X chromosome
1446234_at	158.967	185.9	146.333	73.82	110.3	332.267	Utx	Mm.257498	Ubiquitously transcribed tetratricopeptide repeat gene, X chromosome
1446278_at	97.9333	101.3	93	49.96	47.3	146.367	Utx	Mm.257498	Ubiquitously transcribed tetratricopeptide repeat gene, X chromosome
1451863_at	8.33333	31.7	37.8	11.28	9.43333	7.53333	Uts2r	Mm.20122	urotensin 2 receptor
1421799_at	2.83333	6.86667	4.13333	4.98	3.43333	6.63333	Uts2	Mm.89984	urotensin 2
1426892_at	84.3667	414.333	898.933	218.36	102.333	264.267	Utrn	Mm.331784	utrophin
1427569_a_at	80.3333	131.733	165.367	47.86	87.3333	72.8333	Utrn	Mm.331784	utrophin
1452222_at	2741.17	19774.4	17790	7599.3	3981.83	10580.1	Utrn	Mm.331784	utrophin
1424500_at	429.767	465.767	409.7	467.4	416.333	319.367	Utp6	Mm.274961	UTP6, small subunit (SSU) processome component, homolog (yeast)
1424501_at	787.7	563.933	535.033	490.3	556.933	548.6	Utp6	Mm.274961	UTP6, small subunit (SSU) processome component, homolog (yeast)
1451378_at	122.767	85.4333	72.7	119.58	164.2	61.7333	Utp6	Mm.274961	UTP6, small subunit (SSU) processome component, homolog (yeast)
1452252_at	653.267	537.967	419.8	660.54	598.4	690.433	Utp20	Mm.29631	UTP20, small subunit (SSU) processome component, homolog (yeast)
1459028_at	18.8667	26	26.2667	4.54	6.23333	9.9	Utp20	Mm.29631	UTP20, small subunit (SSU) processome component, homolog (yeast)
1447266_at	27.3333	21.3667	46	18.1	38.7667	37.4667	Utp18	Mm.379350	UTP18, small subunit (SSU) processome component, homolog (yeast)
1454817_at	890.333	674.8	1170.67	1645.08	965.633	772.633	Utp18	Mm.379350	UTP18, small subunit (SSU) processome component, homolog (yeast)
1434125_at	396	435.567	572.533	780.46	669.533	354.867	Utp15	Mm.28221	UTP15, U3 small nucleolar ribonucleoprotein, homolog (yeast)
1454846_at	541.167	549.667	447.867	794.5	462.333	382.833	Utp15	Mm.28221	UTP15, U3 small nucleolar ribonucleoprotein, homolog (yeast)
1438579_at	477.6	587.567	1042.6	578.1	224.167	283.867	Utp14b	---	UTP14, U3 small nucleolar ribonucleoprotein, homolog B (yeast)
1432250_at	66.3	61.9	83.1667	61.9	66.9667	109	Utp14a	Mm.336045	UTP14, U3 small nucleolar ribonucleoprotein, homolog A (yeast)
1435099_at	956.7	1581.5	1878	2816.92	1216.7	1371.77	Utp14a	Mm.336045	UTP14, U3 small nucleolar ribonucleoprotein, homolog A (yeast)
1429485_a_at	844.533	1545.57	1285.2	1437.08	3265.2	862.367	Utp11l	Mm.259121	UTP11-like, U3 small nucleolar ribonucleoprotein, (yeast)
1453162_at	439.867	838.033	556.867	321.4	985.467	359.5	Utp11l	Mm.259121	UTP11-like, U3 small nucleolar ribonucleoprotein, (yeast)
1459944_at	22.1	33.4	12.8667	13.98	25.8667	23.3667	Utp11l	Mm.259121	UTP11-like, U3 small nucleolar ribonucleoprotein, (yeast)
1416899_at	27.2333	61.1	16.5	34.68	59.4	23.2667	Utf1	Mm.10205	undifferentiated embryonic cell transcription factor 1
1443786_at	3.76667	10.0333	5.6	3.68	9.23333	5.73333	Utf1	Mm.10205	undifferentiated embryonic cell transcription factor 1
1458333_x_at	33	22.4	36.4333	26.5	13.9333	25.5667	Utf1	Mm.10205	undifferentiated embryonic cell transcription factor 1
1437293_x_at	97.9333	27.8	10.4333	17.3	81.9667	16.6	Ust	Mm.41163	uronyl-2-sulfotransferase
1458897_at	285.4	106.833	133.067	80.2	144.5	179.633	Ust	Mm.41163	uronyl-2-sulfotransferase
1433927_at	1092.67	1242.1	1255.87	681	1326.27	1044.6	Uspl1	Mm.29402	ubiquitin specific peptidase like 1
1452509_at	8.96667	17.1667	22	10.3	19.2	21.9667	Usp9y	Mm.347376	ubiquitin specific peptidase 9, Y chromosome
1420922_at	1062.47	666.1	456.867	414.58	593.9	659.967	Usp9x	Mm.242646	ubiquitin specific peptidase 9, X chromosome
1420923_at	19.9333	35.5667	25.2667	33.52	37.9667	48.8667	Usp9x	Mm.242646	ubiquitin specific peptidase 9, X chromosome
1428193_at	521.3	326.1	206.667	297.66	310.667	364.233	Usp9x	Mm.242646	ubiquitin specific peptidase 9, X chromosome
1428194_at	1103.27	681.867	429.867	358.34	513.3	527.267	Usp9x	Mm.242646	ubiquitin specific peptidase 9, X chromosome
1450037_at	33.7667	12.6333	1.23333	13.16	29.3333	46.6	Usp9x	Mm.242646	ubiquitin specific peptidase 9, X chromosome
1450038_s_at	88.4333	50.4667	28.2333	34.82	22.5	34.8	Usp9x	Mm.242646	ubiquitin specific peptidase 9, X chromosome
1450039_at	283.833	501.6	379	762.66	460.267	942.233	Usp9x	Mm.242646	ubiquitin specific peptidase 9, X chromosome
1422883_at	794.8	1002.37	456.533	717.42	891.833	793.633	Usp8	Mm.272629	ubiquitin specific peptidase 8
1443420_at	11.0667	1.76667	3.16667	4.36	3.53333	7.53333	Usp8	Mm.272629	Ubiquitin specific peptidase 8
1446807_at	258.533	194.467	80.0667	117.4	146	121.967	Usp8	Mm.272629	ubiquitin specific peptidase 8
1447386_at	19.8667	13.7667	9.1	19.08	25.1667	25.4	Usp8	Mm.272629	Ubiquitin specific peptidase 8
1419920_s_at	3216.2	4975.67	5657.7	4878.62	4486.93	5454.6	Usp7	Mm.295330	ubiquitin specific peptidase 7
1419921_s_at	105.267	158	209.733	117.28	188.1	220	Usp7	Mm.295330	Ubiquitin specific peptidase 7
1434371_x_at	1039.43	1293.17	1375.57	1490.46	893.367	1305.63	Usp7	Mm.295330	ubiquitin specific peptidase 7
1437118_at	364.833	527.467	744.9	713.8	159.7	762.633	Usp7	Mm.295330	ubiquitin specific peptidase 7
1454948_at	1023.3	1355.87	1600.77	1795.62	965.967	1776.27	Usp7	Mm.295330	ubiquitin specific peptidase 7
1454949_at	339.467	392.967	639.3	370.64	481.033	747.833	Usp7	Mm.392837	Ubiquitin specific peptidase 7
1440883_at	475.1	1135.73	1265	1192.96	338.967	538.867	Usp6nl	Mm.40673	USP6 N-terminal like
1455580_at	1341.83	3373.93	3684.27	2503.84	1154.93	1333.1	Usp6nl	Mm.40673	USP6 N-terminal like
1428731_at	3920.6	3913.13	2694.57	678.42	1710.5	936.667	Usp54	Mm.301173	ubiquitin specific peptidase 54
1444507_at	302.7	699.933	680.1	295.3	221.067	293.5	Usp53	Mm.219684	ubiquitin specific peptidase 53
1446572_at	12.6667	29.8667	94.1333	19.46	4.1	19.8	Usp53	Mm.219684	Ubiquitin specific peptidase 53
1452385_at	491.9	701.933	1098.17	369	66.7667	117.167	Usp53	Mm.219684	ubiquitin specific peptidase 53
1458899_at	92.9	172.667	155.833	84.6	45.3667	103.6	Usp53	Mm.219684	ubiquitin specific peptidase 53
1426700_a_at	360.3	765	436.033	755.5	705.733	830.167	Usp52	Mm.244183	ubiquitin specific peptidase 52
1430760_a_at	4.76667	16.4	12.7333	9.16	8.03333	4.86667	Usp50	Mm.389373	ubiquitin specific peptidase 50
1453670_at	3	5.93333	17.5333	12.16	41.6333	17.6667	Usp50	Mm.389373	ubiquitin specific peptidase 50
1448311_at	1090.7	548.733	610.633	874.96	813.567	459.9	Usp5	Mm.3571	ubiquitin specific peptidase 5 (isopeptidase T)
1419277_at	449.4	398.5	662.267	327.68	348.633	470.7	Usp48	Mm.218478	ubiquitin specific peptidase 48
1419278_at	1510.03	1697.53	1582.47	1022.24	1616.03	1511.33	Usp48	Mm.218478	ubiquitin specific peptidase 48
1424056_at	1094.73	865.733	796.667	697.06	842.067	867.567	Usp48	Mm.218478	ubiquitin specific peptidase 48
1426976_at	2826.77	3513.27	3988	3737.18	2798.47	3404	Usp47	Mm.16974	ubiquitin specific peptidase 47
1426977_at	1012.6	2171.23	2696.4	2402.34	1657.87	1869.03	Usp47	Mm.16974	ubiquitin specific peptidase 47
1457454_at	152.4	138.467	80.2	81.46	89.8667	268.2	Usp47	Mm.16974	ubiquitin specific peptidase 47
1435325_at	1069.87	1856.37	2307.93	2015.64	1118.1	738.533	Usp46	Mm.48795	ubiquitin specific peptidase 46
1436518_at	1269.9	1249.17	1611.97	1300.42	586.533	564.667	Usp46	Mm.430855	Ubiquitin specific peptidase 46
1440416_at	21.8667	55.6333	54.1667	29.58	32.6	18.4333	Usp46	Mm.48795	Ubiquitin specific peptidase 46
1427990_at	976.1	918.933	657	731.6	1030.2	984.9	Usp45	Mm.154306	ubiquitin specific petidase 45
1427991_s_at	1393.27	957.833	958.933	831.38	1207.2	1328.07	Usp45	Mm.154306	ubiquitin specific petidase 45
1430708_a_at	65.6333	92.2	97.6	57.22	95.1667	68.9	Usp45	Mm.154306	ubiquitin specific petidase 45
1457308_at	10.4667	9.03333	11.7	6.84	5.7	13.6667	Usp45	Mm.154306	Ubiquitin specific petidase 45
1424866_at	47.6333	245.3	284.167	199.22	49.5333	165.867	Usp43	Mm.158885	ubiquitin specific peptidase 43
1451514_at	13.0667	67.2667	32.2	46.36	10.3	29.9333	Usp43	Mm.158885	ubiquitin specific peptidase 43
1434782_at	713.6	1024.1	1157.17	870.28	977	961.267	Usp42	Mm.259620	ubiquitin specific peptidase 42
1459934_at	11.3333	12.3667	20.6333	11.58	27.2333	16.6333	Usp42	Mm.259620	ubiquitin specific peptidase 42
1435901_at	360.567	432.367	402.967	258.08	297.867	116.1	Usp40	Mm.80484	ubiquitin specific peptidase 40
1438242_at	208.7	142.967	119.667	125.82	173.533	106.467	Usp40	Mm.80484	ubiquitin specific peptidase 40
1446209_at	121.167	41.3	47.3333	49.06	70.1	73.1	Usp40	Mm.80484	ubiquitin specific peptidase 40
1458079_at	91.7	24.9	30.5	32.18	46.9333	57.8667	Usp40	Mm.80484	ubiquitin specific peptidase 40
1442319_at	138.867	66.9333	62.3333	44.36	66.3	81.9333	Usp4	---	ubiquitin specific peptidase 4 (proto-oncogene)
1450892_a_at	1051.37	1523.6	1317.4	1702.78	1557.4	1152.1	Usp4	Mm.3974	ubiquitin specific peptidase 4 (proto-oncogene)
1437007_x_at	3041.13	4194.33	4982.83	3305.46	2876.5	2681.43	Usp39	Mm.281900	ubiquitin specific peptidase 39
1460209_at	729.533	803.033	648.5	924.62	815.067	534.967	Usp39	Mm.281900	ubiquitin specific peptidase 39
1428592_s_at	335.367	316.3	345.5	543.98	540.833	296.7	Usp38	Mm.432021	ubiquitin specific peptidase 38
1434242_at	329.367	436.733	237.9	314.18	251.7	249.767	Usp37	Mm.66568	ubiquitin specific peptidase 37
1438212_at	379.567	424.433	486.767	302.5	154.433	498.267	Usp37	Mm.66568	ubiquitin specific peptidase 37
1455237_at	402.7	332.833	238.267	415.22	374.167	356	Usp36	Mm.232293	ubiquitin specific peptidase 36
1456094_at	273.367	165.733	321.233	193.18	135.6	239.633	Usp36	Mm.232293	ubiquitin specific peptidase 36
1458311_at	242.467	259.467	223.3	150.8	240.567	349.8	Usp36	Mm.232293	ubiquitin specific peptidase 36
1434392_at	2414.83	3334.4	4324.83	3014.9	1909.83	3809.93	Usp34	Mm.119155	ubiquitin specific peptidase 34
1434393_at	329.667	654.533	620.867	505.3	177.833	631.933	Usp34	Mm.119155	ubiquitin specific peptidase 34
1444437_at	329.733	212.933	198.3	80	88.3	122.067	Usp34	Mm.119155	ubiquitin specific peptidase 34
1426709_a_at	1382.97	1082.43	1086.47	749.14	1221.4	1625.83	Usp33	Mm.258320	ubiquitin specific peptidase 33
1430403_at	183.533	99.4	121.5	45.08	58.9	197.733	Usp32	Mm.178524	ubiquitin specific peptidase 32
1436159_at	4241.57	2486.2	2988.7	1967.12	2325.63	3218.43	Usp32	Mm.178524	ubiquitin specific peptidase 32
1443689_at	51.4	20.9	23.3333	21.54	21.3333	29.5	Usp32	Mm.178524	Ubiquitin specific peptidase 32
1459857_at	480.1	113.1	215.833	64.88	160.267	431.4	Usp32	Mm.178524	ubiquitin specific peptidase 32
1419828_at	15.3667	9.76667	6.16667	3.72	15.2333	5.26667	Usp31	Mm.122538	ubiquitin specific peptidase 31
1431129_at	54.9	71.5	63.7667	46.2	59.2667	76.5333	Usp31	Mm.122538	ubiquitin specific peptidase 31
[truncated: 43,102 more rows]
